# Supplementary material for: Octopamine integrates the status of internal energy supply into the formation of food-related memories
Source: eLife. 2024 Apr 24;12:RP88247. doi: 10.7554/eLife.88247 (PMC11042807; doi:10.7554/eLife.88247)
Supplement: Figure 1—source data 1. [file elife-88247-fig1-data1.xlsx]

## Sheet: Figure 1 raw data
Figure 1B
	Training	Test
	STM	2 min
		2M sucrose					2M sucrose								2M sucrose
		Reinforced					Reinforced								Reinforced					2M sucrose
Genotype	Starvation	3OCT	MCH	AI		3OCT	MCH	AI		LI			Genotype	Starvation	3OCT	MCH	AI		3OCT	Reinforced	AI		LI
w1118	16 h	41	16	0.438596		11	15	0.153846		0.296221			w1118	40 h	30	10	0.5		17	40	0.403509		0.451754
w1118	16 h	30	26	0.0714286		10	22	0.375		0.223214			w1118	40 h	20	29	-0.183673		6	30	0.666667		0.241497
w1118	16 h	32	14	0.391304		9	32	0.560976		0.47614			w1118	40 h	38	11	0.55102		3	20	0.73913		0.645075
w1118	16 h	40	17	0.403509		7	50	0.754386		0.578947			w1118	40 h	44	6	0.76		3	31	0.823529		0.791765
w1118	16 h	35	16	0.372549		29	32	0.0491803		0.210865			w1118	40 h	12	9	0.142857		0	15	1		0.571429
w1118	16 h	32	22	0.185185		19	28	0.191489		0.188337			w1118	40 h	24	9	0.454545		11	37	0.541667		0.498106
w1118	16 h	38	12	0.52		23	29	0.115385		0.317692			w1118	40 h	23	20	0.0697674		6	64	0.828571		0.449169
w1118	16 h	39	17	0.392857		15	32	0.361702		0.37728			w1118	40 h	30	5	0.714286		17	41	0.413793		0.564039
w1118	16 h	40	11	0.568627		16	22	0.157895		0.363261			w1118	40 h	7	0	1		6	30	0.666667		0.833333
w1118	16 h	64	6	0.828571		21	32	0.207547		0.518059			w1118	40 h	4	1	0.6		5	28	0.69697		0.648485
w1118	16 h	36	29	0.107692		2	28	0.866667		0.487179			w1118	40 h	3	2	0.2		3	15	0.666667		0.433333
w1118	16 h	33	17	0.32		31	44	0.173333		0.246667			w1118	40 h	26	8	0.529412		1	15	0.875		0.702206
w1118	16 h	4	4	0		13	7	-0.3		-0.15			w1118	40 h	15	4	0.578947		7	4	-0.272727		0.15311
w1118	16 h	10	4	0.428571		2	2	0		0.214286			w1118	40 h	20	0	1		2	4	0.333333		0.666667
		2M sucrose					2M sucrose								2M sucrose					2M sucrose
		Reinforced					Reinforced								Reinforced					Reinforced
Genotype	Starvation	3OCT	MCH	AI		3OCT	MCH	AI		LI			Genotype	Starvation time	3OCT	MCH	AI		3OCT	MCH	AI		LI
TßhnM18	16 h	28	7	0.6		17	10	-0.259259		0.17037			TßhnM18	40 h	25	8	0.515152		12	13	0.04		0.277576
TßhnM18	16 h	12	9	0.142857		12	18	0.2		0.171429			TßhnM18	40 h	14	15	-0.0344828		5	15	0.5		0.232759
TßhnM18	16 h	18	18	0		26	21	-0.106383		-0.0531915			TßhnM18	40 h	18	0	1		1	15	0.875		0.9375
TßhnM18	16 h	26	20	0.130435		24	15	-0.230769		-0.0501672			TßhnM18	40 h	6	2	0.5		4	30	0.764706		0.632353
TßhnM18	16 h	4	12	-0.5		13	9	-0.181818		-0.340909			TßhnM18	40 h	15	2	0.764706		4	17	0.619048		0.691877
TßhnM18	16 h	13	11	0.0833333		15	21	0.166667		0.125			TßhnM18	40 h	7	2	0.555556		6	20	0.538462		0.547009
TßhnM18	16 h	16	6	0.454545		12	17	0.172414		0.31348			TßhnM18	40 h	6	9	-0.2		0	21	1		0.4
TßhnM18	16 h	25	13	0.315789		16	7	-0.391304		-0.0377574			TßhnM18	40 h	5	8	-0.230769		15	21	0.166667		-0.0320513
TßhnM18	16 h	15	10	0.2		20	14	-0.176471		0.0117647			TßhnM18	40 h	6	8	-0.142857		6	11	0.294118		0.0756303
TßhnM18	16 h	40	23	0.269841		27	26	-0.0188679		0.125487			TßhnM18	40 h	31	9	0.55		17	20	0.0810811		0.315541
TßhnM18	16 h	54	15	0.565217		44	20	-0.375		0.0951087			TßhnM18	40 h	18	9	0.333333		9	36	0.6		0.466667
TßhnM18	16 h	6	1	0.714286		11	9	-0.1		0.307143			TßhnM18	40 h	7	11	-0.222222		2	17	0.789474		0.283626
TßhnM18	16 h	2	4	-0.333333		23	8	-0.483871		-0.408602			TßhnM18	40 h	14	5	0.473684		3	35	0.842105		0.657895
Figure 1B
	Training	Test
	STM	6 h
		Reinforced					2M sucrose								2M sucrose
		2M sucrose					Reinforced								Reinforced					Reinforced
Genotype	Starvation	3OCT	MCH	AI		3OCT	MCH	AI		LI			Genotype	Starvation	3OCT	MCH	AI		3OCT	MCH	AI		LI
w1118	16 h	8	9	-0.0588235		29	11	-0.45		-0.254412			w1118	40 h	13	0	1		1	3	0.5		0.75
w1118	16 h	16	17	-0.030303		5	12	0.411765		0.190731			w1118	40 h	4	1	0.6		1	7	0.75		0.675
w1118	16 h	17	7	0.416667		14	11	-0.12		0.148333			w1118	40 h	3	5	-0.25		1	8	0.777778		0.263889
w1118	16 h	7	14	-0.333333		15	16	0.0322581		-0.150538			w1118	40 h	4	2	0.333333		0	1	1		0.666667
w1118	16 h	22	16	0.157895		9	17	0.307692		0.232794			w1118	40 h	5	6	-0.0909091		4	18	0.636364		0.272727
w1118	16 h	30	16	0.304348		10	45	0.636364		0.470356			w1118	40 h	5	7	-0.166667		1	5	0.666667		0.25
w1118	16 h	23	25	-0.0416667		18	40	0.37931		0.168822			w1118	40 h	11	9	0.1		14	10	-0.166667		-0.0333333
w1118	16 h	19	12	0.225806		4	21	0.68		0.452903			w1118	40 h	15	4	0.578947		6	17	0.478261		0.528604
w1118	16 h	19	18	0.027027		11	24	0.371429		0.199228			w1118	40 h	12	4	0.5		10	21	0.354839		0.427419
		2M sucrose					2M sucrose								2M sucrose					2M sucrose
		Reinforced					Reinforced								Reinforced					Reinforced
Genotype	Starvation	3OCT	MCH	AI		3OCT	MCH	AI		LI			Genotype	Starvation	3OCT	MCH	AI		3OCT	MCH	AI		LI
TßhnM18	16 h	7	1	0.75		25	9	-0.470588		0.139706			TßhnM18	40 h	4	2	0.333333		2	4	0.333333		0.333333
TßhnM18	16 h	23	14	0.243243		16	17	0.030303		0.136773			TßhnM18	40 h	4	6	-0.2		3	10	0.538462		0.169231
TßhnM18	16 h	15	7	0.363636		9	17	0.307692		0.335664			TßhnM18	40 h	13	5	0.444444		3	12	0.6		0.522222
TßhnM18	16 h	18	14	0.125		9	25	0.470588		0.297794			TßhnM18	40 h	17	0	1		1	3	0.5		0.75
TßhnM18	16 h	9	20	-0.37931		12	21	0.272727		-0.0532915			TßhnM18	40 h	3	1	0.5		0	24	1		0.75
TßhnM18	16 h	22	12	0.294118		10	8	-0.111111		0.0915033			TßhnM18	40 h	4	8	-0.333333		2	4	0.333333		0
TßhnM18	16 h	16	18	-0.0588235		10	20	0.333333		0.137255			TßhnM18	40 h	7	5	0.166667		4	4	0		0.0833333
TßhnM18	16 h	26	8	0.529412		5	23	0.642857		0.586134			TßhnM18	40 h	1	2	-0.333333		1	2	0.333333		0
TßhnM18	16 h	16	5	0.52381		10	6	-0.25		0.136905			TßhnM18	40 h	13	3	0.625		7	7	0		0.3125
TßhnM18	16 h	18	3	0.714286		15	18	0.0909091		0.402597			TßhnM18	40 h	14	10	0.166667		5	21	0.615385		0.391026
Figure 1B
	Training	Test
	STM	24 h
		2M sucrose					2M sucrose								2M sucrose					2M sucrose
		Reinforced					Reinforced								Reinforced					Reinforced
Genotype	Starvation	3OCT	MCH	AI		3OCT	MCH	AI		LI			Genotype	Starvation	3OCT	MCH	AI		3OCT	MCH	AI		LI
w1118	16 h	15	22	-0.189189		7	29	0.611111		0.210961			w1118	40 h	4	4	0		8	7	-0.0666667		-0.0333333
w1118	16 h	20	8	0.428571		20	37	0.298246		0.363409			w1118	40 h	8	5	0.230769		8	2	-0.6		-0.184615
w1118	16 h	7	19	-0.461538		17	42	0.423729		-0.0189048			w1118	40 h	3	6	-0.333333		5	1	-0.666667		-0.5
w1118	16 h	7	28	-0.6		6	18	0.5		-0.05			w1118	40 h	5	12	-0.411765		2	4	0.333333		-0.0392157
w1118	16 h	25	25	0		7	8	0.0666667		0.0333333			w1118	40 h	7	3	0.4		5	8	0.230769		0.315385
w1118	16 h	1	8	-0.777778		17	25	0.190476		-0.293651			w1118	40 h	10	12	-0.0909091		8	20	0.428571		0.168831
w1118	16 h	17	29	-0.26087		16	17	0.030303		-0.115283			w1118	40 h	4	6	-0.2		8	3	-0.454545		-0.327273
w1118	16 h	17	17	0		31	31	0		0			w1118	40 h	5	5	0		3	8	0.454545		0.227273
w1118	16 h	15	26	-0.268293		24	25	0.0204082		-0.123942			w1118	40 h	6	4	0.2		8	7	-0.0666667		0.0666667
w1118	16 h	36	16	0.384615		18	42	0.4		0.392308			w1118	40 h	17	16	0.030303		5	6	0.0909091		0.0606061
w1118	16 h	21	42	-0.333333		32	37	0.0724638		-0.130435			w1118	40 h	35	33	0.0294118		41	45	0.0465116		0.0379617
w1118	16 h	43	46	-0.0337079		28	35	0.111111		0.0387016			w1118	40 h	8	18	-0.384615		27	29	0.0357143		-0.174451
w1118	16 h	32	42	-0.135135		12	35	0.489362		0.177113			w1118	40 h	20	7	0.481481		8	13	0.238095		0.359788
w1118	16 h	43	59	-0.156863		31	45	0.184211		0.0136739			w1118	40 h	35	32	0.0447761		12	14	0.0769231		0.0608496
													w1118	40 h	32	18	0.28		22	40	0.290323		0.285161
													w1118	40 h	18	20	-0.0526316		19	35	0.296296		0.121832
													w1118	40 h	35	13	0.458333		12	31	0.44186		0.450097
			2M sucrose					2M sucrose							2M sucrose					2M sucrose
			Reinforced					Reinforced							Reinforced					Reinforced
Genotype	Starvation	3OCT	MCH	AI		3OCT	MCH	AI		LI			Genotype	Starvation	3OCT	MCH	AI		3OCT	MCH	AI		LI
TßhnM18	16 h	7	7	0		5	12	0.411765		0.205882			TßhnM18	40 h	5	2	0.428571		2	7	0.555556		0.492063
TßhnM18	16 h	4	4	0		1	15	0.875		0.4375			TßhnM18	40 h	5	3	0.25		2	1	-0.333333		-0.0416667
TßhnM18	16 h	7	8	-0.0666667		2	10	0.666667		0.3			TßhnM18	40 h	2	3	-0.2		2	2	0		-0.1
TßhnM18	16 h	32	13	0.422222		1	8	0.777778		0.6			TßhnM18	40 h	1	2	-0.333333		2	4	0.333333		0
TßhnM18	16 h	24	25	-0.0204082		2	14	0.75		0.364796			TßhnM18	40 h	5	1	0.666667		1	2	0.333333		0.5
TßhnM18	16 h	7	2	0.555556		2	4	0.333333		0.444444			TßhnM18	40 h	2	0	1		1	2	0.333333		0.666667
TßhnM18	16 h	8	5	0.230769		4	10	0.428571		0.32967			TßhnM18	40 h	2	3	-0.2		0	2	1		0.4
TßhnM18	16 h	14	4	0.555556		0	25	1		0.777778			TßhnM18	40 h	4	1	0.6		2	4	0.333333		0.466667
TßhnM18	16 h	2	3	-0.2		4	6	0.2		0			TßhnM18	40 h	2	2	0		1	8	0.777778		0.388889
TßhnM18	16 h	8	6	0.142857		6	13	0.368421		0.255639			TßhnM18	40 h	6	5	0.0909091		3	4	0.142857		0.116883
TßhnM18	16 h	4	3	0.142857		4	20	0.666667		0.404762			TßhnM18	40 h	3	2	0.2		1	8	0.777778		0.488889
TßhnM18	16 h	8	3	0.454545		15	34	0.387755		0.42115			TßhnM18	40 h	4	2	0.333333		17	26	0.209302		0.271318
TßhnM18	16 h	2	1	0.333333		4	6	0.2		0.266667			TßhnM18	40 h	22	0	1		7	28	0.6		0.8
TßhnM18	16 h	1	2	-0.333333		7	21	0.5		0.0833333			TßhnM18	40 h	21	22	-0.0232558		6	28	0.647059		0.311902
													TßhnM18	40 h	32	6	0.684211		9	35	0.590909		0.63756

## Sheet: Sensory acuity
Sensory perception
Genotype	Treatment	3-Oct [1:100]	MCH [1:80]	Balance	Sucrose preference 0.15 M	Sucrose preference 2 M	N
w1118	16 h starved	-0.35 ± 0.09a	-0.30 ± 0.08a	-0.07 ± 0.06	0.35 ± 0.09a	0.31 ± 0.06a	6 - 15
TβhnM18	16 h starved	-0.65 ± 0.04a	-0.68 ± 0.06a	0.08 ± 0.16	0.21 ± 0.05a	0.31 ± 0.07a	6 - 10
w1118	40 h starved	-0.58 ± 0.10a	-0.37 ± 0.15a	0.03 ± 0.15	0.29 ± 0.06a	0.36 ± 0.1a	6 - 10
TβhnM18	40 h starved	-0.32 ± 0.08a	-0.36 ± 0.08a	-0.06 ± 0.12	0.23 ± 0.05a	0.17 ± 0.04a	8 - 9
Sucrose Intake
Genotype	Treatment	Sucrose Intake 2M	N
w1118	16 h starved	0.63 ± 0.05	11
TβhnM18	16 h starved	0.72 ± 0.04	11
w1118	40 h starved	0.52 ± 0.08	12
TβhnM18	40 h starved	0.66 ± 0.07	12
a difference from random choice
