# Supplementary material for: Octopamine integrates the status of internal energy supply into the formation of food-related memories
Source: eLife. 2024 Apr 24;12:RP88247. doi: 10.7554/eLife.88247 (PMC11042807; doi:10.7554/eLife.88247)
Supplement: Figure 2—source data 1. [file elife-88247-fig2-data1.xlsx]

## Sheet: Figure 2 
Figure 2A
	Training	cold-shock	Test
	STM	no/yes	3h
			2M sucrose					2M sucrose									2M sucrose					2M sucrose									2M sucrose					2M sucrose
			Reinforced					Reinforced									Reinforced					Reinforced									Reinforced					Reinforced
Genotype	Starvation	cold-shock	3OCT	MCH	AI		3OCT	MCH	AI		LI			Genotype	Starvation	cold-shock	3OCT	MCH	AI		3OCT	MCH	AI		LI			Genotype	Starvation	cold-shock	3OCT	MCH	AI		3OCT	MCH	AI		LI
w1118	16 h	no	14	7	0.333333		11	21	0.3125		0.322917			w1118	16 h	2 min	4	15	-0.578947		8	26	0.529412		-0.0247678			w1118	16 h	2 h	20	23	-0.0697674		8	16	0.333333		0.131783
w1118	16 h	no	17	13	0.133333		11	27	0.421053		0.277193			w1118	16 h	2 min	9	13	-0.181818		14	22	0.222222		0.020202			w1118	16 h	2 h	19	34	-0.283019		14	9	-0.217391		-0.250205
w1118	16 h	no	30	21	0.176471		10	21	0.354839		0.265655			w1118	16 h	2 min	12	26	-0.368421		18	39	0.368421		0			w1118	16 h	2 h	17	19	-0.0555556		18	12	-0.2		-0.127778
w1118	16 h	no	12	4	0.5		17	22	0.128205		0.314103			w1118	16 h	2 min	15	22	-0.189189		13	15	0.0714286		-0.0588803			w1118	16 h	2 h	13	16	-0.103448		11	8	-0.157895		-0.130672
w1118	16 h	no	17	14	0.0967742		6	15	0.428571		0.262673			w1118	16 h	2 min	6	9	-0.2		11	14	0.12		-0.04			w1118	16 h	2 h	10	14	-0.166667		13	21	0.235294		0.0343137
w1118	16 h	no	17	31	-0.291667		11	22	0.333333		0.0208333			w1118	16 h	2 min	11	15	-0.153846		15	11	-0.153846		-0.153846			w1118	16 h	2 h	11	16	-0.185185		22	13	-0.257143		-0.221164
w1118	16 h	no	18	11	0.241379		11	23	0.352941		0.29716			w1118	16 h	2 min	25	15	0.25		19	17	-0.0555556		0.0972222			w1118	16 h	2 h	17	20	-0.0810811		10	3	-0.538462		-0.309771
w1118	16 h	no	26	24	0.04		18	24	0.142857		0.0914286			w1118	16 h	2 min	20	28	-0.166667		23	21	-0.0454545		-0.106061			w1118	16 h	2 h	23	40	-0.269841		12	38	0.52		0.125079
w1118	16 h	no	9	15	-0.25		16	22	0.157895		-0.0460526			w1118	16 h	2 min	19	25	-0.136364		14	21	0.2		0.0318182
w1118	16 h	no	26	18	0.181818		10	19	0.310345		0.246082			w1118	16 h	2 min	14	19	-0.151515		25	16	-0.219512		-0.185514
			2M sucrose					2M sucrose									2M sucrose					2M sucrose									2M sucrose					2M sucrose
			Reinforced					Reinforced									Reinforced					Reinforced									Reinforced					Reinforced
Genotype	Starvation	cold-shock	3OCT	MCH	AI		3OCT	MCH	AI		LI			Genotype	Starvation	cold-shock	3OCT	MCH	AI		3OCT	MCH	AI		LI			Genotype	Starvation	cold-shock	3OCT	MCH	AI		3OCT	MCH	AI		LI
TßhnM18	16 h	no	26	13	0.333333		3	13	0.625		0.479167			TßhnM18	16 h	2 min	12	24	-0.333333		10	40	0.6		0.133333			TßhnM18	16 h	2 h	36	12	0.5		6	8	0.142857		0.321429
TßhnM18	16 h	no	25	10	0.428571		15	21	0.166667		0.297619			TßhnM18	16 h	2 min	23	46	-0.333333		1	6	0.714286		0.190476			TßhnM18	16 h	2 h	4	3	0.142857		4	6	0.2		0.171429
TßhnM18	16 h	no	31	19	0.24		2	8	0.6		0.42			TßhnM18	16 h	2 min	15	21	-0.166667		17	30	0.276596		0.0549645			TßhnM18	16 h	2 h	15	6	0.428571		5	7	0.166667		0.297619
TßhnM18	16 h	no	11	2	0.692308		9	24	0.454545		0.573427			TßhnM18	16 h	2 min	7	11	-0.222222		25	5	-0.666667		-0.444444			TßhnM18	16 h	2 h	12	24	-0.333333		5	11	0.375		0.0208333
TßhnM18	16 h	no	8	7	0.0666667		12	17	0.172414		0.11954			TßhnM18	16 h	2 min	6	8	-0.142857		6	11	0.294118		0.0756303			TßhnM18	16 h	2 h	22	6	0.571429		3	17	0.7		0.635714
TßhnM18	16 h	no	17	14	0.0967742		10	9	-0.0526316		0.0220713			TßhnM18	16 h	2 min	10	15	-0.2		3	17	0.7		0.25			TßhnM18	16 h	2 h	4	6	-0.2		5	15	0.5		0.15
TßhnM18	16 h	no	41	16	0.438596		28	20	-0.166667		0.135965			TßhnM18	16 h	2 min	9	13	-0.181818		9	15	0.25		0.0340909			TßhnM18	16 h	2 h	29	29	0		20	53	0.452055		0.226027
TßhnM18	16 h	no	6	24	-0.6		7	16	0.391304		-0.104348			TßhnM18	16 h	2 min	4	15	-0.578947		6	7	0.0769231		-0.251012			TßhnM18	16 h	2 h	28	34	-0.0967742		21	29	0.16		0.0316129
TßhnM18	16 h	no	27	23	0.08		12	24	0.333333		0.206667			TßhnM18	16 h	2 min	11	25	-0.388889		7	22	0.517241		0.0641762			TßhnM18	16 h	2 h	4	3	0.142857		6	8	0.142857		0.142857
TßhnM18	16 h	no	11	10	0.047619		5	14	0.473684		0.260652			TßhnM18	16 h	2 min	12	31	-0.44186		14	21	0.2		-0.12093			TßhnM18	16 h	2 h	9	10	-0.0526316		3	8	0.454545		0.200957
														TßhnM18	16 h	2 min	5	11	-0.375		3	9	0.5		0.0625
			2M sucrose					2M sucrose									2M sucrose					2M sucrose										2M sucrose					2M sucrose
			Reinforced					Reinforced									Reinforced					Reinforced										Reinforced					Reinforced
Genotype	Starvation	cold-shock	3OCT	MCH	AI		3OCT	MCH	AI		LI			Genotype	Starvation	cold-shock	3OCT	MCH	AI		3OCT	MCH	AI		LI			Genotype	Starvation	cold-shock	3OCT	MCH	AI		3OCT	MCH	AI		LI
w1118	40 h	no	4	6	-0.2		14	28	0.333333		0.0666667			w1118	40 h	2 min	12	24	-0.333333		15	41	0.464286		0.0654762			w1118	40 h	2 h	11	22	-0.333333		16	20	0.111111		-0.111111
w1118	40 h	no	17	34	-0.333333		12	8	-0.2		-0.266667			w1118	40 h	2 min	5	7	-0.166667		10	30	0.5		0.166667			w1118	40 h	2 h	17	11	0.214286		24	32	0.142857		0.178571
w1118	40 h	no	11	21	-0.3125		17	36	0.358491		0.0229953			w1118	40 h	2 min	12	30	-0.428571		22	21	-0.0232558		-0.225914			w1118	40 h	2 h	29	19	0.208333		36	6	-0.714286		-0.252976
w1118	40 h	no	8	6	0.142857		10	15	0.2		0.171429			w1118	40 h	2 min	20	35	-0.272727		11	32	0.488372		0.107822			w1118	40 h	2 h	15	3	0.666667		16	16	0		0.333333
w1118	40 h	no	32	7	0.641026		2	12	0.714286		0.677656			w1118	40 h	2 min	23	24	-0.0212766		3	2	-0.2		-0.110638			w1118	40 h	2 h	36	18	0.333333		17	16	-0.030303		0.151515
w1118	40 h	no	30	12	0.428571		10	36	0.565217		0.496894			w1118	40 h	2 min	11	23	-0.352941		14	37	0.45098		0.0490196			w1118	40 h	2 h	22	10	0.375		6	36	0.714286		0.544643
w1118	40 h	no	22	33	-0.2		4	24	0.714286		0.257143			w1118	40 h	2 min	16	15	0.0322581		12	23	0.314286		0.173272			w1118	40 h	2 h	17	10	0.259259		13	24	0.297297		0.278278
w1118	40 h	no	25	10	0.428571		15	18	0.0909091		0.25974			w1118	40 h	2 min	14	10	0.166667		16	24	0.2		0.183333			w1118	40 h	2 h	18	8	0.384615		5	17	0.545455		0.465035
w1118	40 h	no	17	7	0.416667		10	32	0.52381		0.470238			w1118	40 h	2 min	27	15	0.285714		48	13	-0.57377		-0.144028			w1118	40 h	2 h	24	12	0.333333		14	19	0.151515		0.242424
w1118	40 h	no	9	19	-0.357143		21	23	0.0454545		-0.155844			w1118	40 h	2 min	31	12	0.44186		20	19	-0.025641		0.20811			w1118	40 h	2 h	36	6	0.714286		9	45	0.666667		0.690476
w1118	40 h	no	31	17	0.291667		15	15	0		0.145833			w1118	40 h	2 min	25	5	0.666667		14	14	0		0.333333			w1118	40 h	2 h	19	7	0.461538		15	24	0.230769		0.346154
w1118	40 h	no	14	7	0.333333		6	22	0.571429		0.452381			w1118	40 h	2 min	32	9	0.560976		24	1	-0.92		-0.179512			w1118	40 h	2 h	25	12	0.351351		25	10	-0.428571		-0.03861
w1118	40 h	no	24	6	0.6		13	26	0.333333		0.466667			w1118	40 h	2 min	10	29	-0.487179		9	12	0.142857		-0.172161			w1118	40 h	2 h	15	32	-0.361702		17	32	0.306122		-0.0277898
w1118	40 h	no	26	12	0.368421		3	27	0.8		0.584211			w1118	40 h	2 min	22	20	0.047619		7	19	0.461538		0.254579			w1118	40 h	2 h	25	5	0.666667		12	22	0.294118		0.480392
w1118	40 h	no	30	15	0.333333		14	27	0.317073		0.325203			w1118	40 h	2 min	15	18	-0.0909091		12	19	0.225806		0.0674487			w1118	40 h	2 h	18	17	0.0285714		10	15	0.2		0.114286
w1118	40 h	no	28	7	0.6		5	25	0.666667		0.633333			w1118	40 h	2 min	10	21	-0.354839		22	20	-0.047619		-0.201229			w1118	40 h	2 h	12	24	-0.333333		5	11	0.375		0.0208333
w1118	40 h	no	13	12	0.04		9	22	0.419355		0.229677																	w1118	40 h	2 h	24	6	0.6		14	20	0.176471		0.388235
																												w1118	40 h	2 h	23	12	0.314286		9	27	0.5		0.407143
			2M sucrose					2M sucrose									2M sucrose					2M sucrose									2M sucrose					2M sucrose
			Reinforced					Reinforced									Reinforced					Reinforced									Reinforced					Reinforced
Genotype	Starvation	cold-shock	3OCT	MCH	AI		3OCT	MCH	AI		LI			Genotype	Starvation	cold-shock	3OCT	MCH	AI		3OCT	MCH	AI		LI			Genotype	Starvation	cold-shock	3OCT	MCH	AI		3OCT	MCH	AI		LI
TßhnM18	40 h	no	12	18	-0.2		12	12	0		-0.1			TßhnM18	40 h	2 min	32	11	0.488372		17	38	0.381818		0.435095			TßhnM18	40 h	2 h	4	5	-0.111111		4	7	0.272727		0.0808081
TßhnM18	40 h	no	18	19	-0.027027		10	20	0.333333		0.153153			TßhnM18	40 h	2 min	3	30	-0.818182		10	30	0.5		-0.159091			TßhnM18	40 h	2 h	12	16	-0.142857		11	50	0.639344		0.248244
TßhnM18	40 h	no	2	10	-0.666667		13	25	0.315789		-0.175439			TßhnM18	40 h	2 min	12	36	-0.5		21	42	0.333333		-0.0833333			TßhnM18	40 h	2 h	51	10	0.672131		5	25	0.666667		0.669399
TßhnM18	40 h	no	19	17	0.0555556		5	21	0.615385		0.33547			TßhnM18	40 h	2 min	12	21	-0.272727		7	21	0.5		0.113636			TßhnM18	40 h	2 h	24	13	0.297297		17	16	-0.030303		0.133497
TßhnM18	40 h	no	16	8	0.333333		13	13	0		0.166667			TßhnM18	40 h	2 min	11	14	-0.12		12	18	0.2		0.04			TßhnM18	40 h	2 h	33	11	0.5		27	18	-0.2		0.15
TßhnM18	40 h	no	21	13	0.235294		7	31	0.631579		0.433437			TßhnM18	40 h	2 min	9	14	-0.217391		2	20	0.818182		0.300395			TßhnM18	40 h	2 h	21	14	0.2		15	12	-0.111111		0.0444444
TßhnM18	40 h	no	24	15	0.230769		19	23	0.0952381		0.163004			TßhnM18	40 h	2 min	8	40	-0.666667		3	31	0.823529		0.0784314			TßhnM18	40 h	2 h	5	25	-0.666667		14	29	0.348837		-0.158915
TßhnM18	40 h	no	37	3	0.85		7	35	0.666667		0.758333			TßhnM18	40 h	2 min	4	35	-0.794872		3	41	0.863636		0.0343823			TßhnM18	40 h	2 h	21	19	0.05		10	20	0.333333		0.191667
TßhnM18	40 h	no	21	9	0.4		10	22	0.375		0.3875			TßhnM18	40 h	2 min	11	18	-0.241379		5	40	0.777778		0.268199			TßhnM18	40 h	2 h	48	12	0.6		4	32	0.777778		0.688889
TßhnM18	40 h	no	37	16	0.396226		11	37	0.541667		0.468947			TßhnM18	40 h	2 min	38	10	0.583333		25	35	0.166667		0.375			TßhnM18	40 h	2 h	30	10	0.5		5	27	0.6875		0.59375
TßhnM18	40 h	no	39	13	0.5		2	11	0.692308		0.596154			TßhnM18	40 h	2 min	29	7	0.611111		15	29	0.318182		0.464646			TßhnM18	40 h	2 h	35	3	0.842105		4	24	0.714286		0.778195
TßhnM18	40 h	no	13	11	0.0833333		8	39	0.659574		0.371454			TßhnM18	40 h	2 min	24	6	0.6		13	18	0.16129		0.380645			TßhnM18	40 h	2 h	12	9	0.142857		10	30	0.5		0.321429
TßhnM18	40 h	no	17	8	0.36		6	25	0.612903		0.486452			TßhnM18	40 h	2 min	12	22	-0.294118		9	27	0.5		0.102941			TßhnM18	40 h	2 h	23	7	0.533333		9	17	0.307692		0.420513
														TßhnM18	40 h	2 min	21	10	0.354839		17	34	0.333333		0.344086			TßhnM18	40 h	2 h	4	16	-0.6		7	28	0.6		0
														TßhnM18	40 h	2 min	20	15	0.142857		12	15	0.111111		0.126984
														TßhnM18	40 h	2 min	19	18	0.027027		13	21	0.235294		0.131161
														TßhnM18	40 h	2 min	17	15	0.0625		28	13	-0.365854		-0.151677
Figure 2B
				Test
	STM	30 min	5 h 30
	20°C	31°C	20°C	20°C
		2 M Sucrose					2 M Sucrose								2 M Sucrose					2 M Sucrose								2 M Sucrose					2 M Sucrose								2 M Sucrose					2 M Sucrose
		Reinforced					Reinforced								Reinforced					Reinforced								Reinforced					Reinforced								Reinforced					Reinforced
Genotype	Starvation	3OCT	MCH	AI		3OCT	MCH	AI		LI			Genotype	Starvation	3OCT	MCH	AI		3OCT	MCH	AI		LI			Genotype	Starvation	3OCT	MCH	AI		3OCT	MCH	AI		LI			Genotype	Starvation	3OCT	MCH	AI		3OCT	MCH	AI		LI
w1118; R15A04-G4/+	16 h	17	35	-0.346154		13	18	0.16129		-0.0924318			wTbhhnM18; R15A04-G4/+	16 h	20	19	0.025641		9	11	0.1		0.0628205			wTbhhnM18; UAS-Shits/+	16 h	17	16	0.030303		8	12	0.2		0.115152			wTbhhnM18; UAS-Shits/R15A04-G4	16 h	9	15	-0.25		22	12	-0.294118		-0.272059
w1118; R15A04-G4/+	16 h	15	26	-0.268293		16	21	0.135135		-0.0665788			wTbhhnM18; R15A04-G4/+	16 h	14	21	-0.2		9	24	0.454545		0.127273			wTbhhnM18; UAS-Shits/+	16 h	19	20	-0.025641		15	16	0.0322581		0.00330852			wTbhhnM18; UAS-Shits/R15A04-G4	16 h	18	22	-0.1		14	17	0.0967742		-0.0016129
w1118; R15A04-G4/+	16 h	12	27	-0.384615		17	12	-0.172414		-0.278515			wTbhhnM18; R15A04-G4/+	16 h	19	16	0.0857143		11	14	0.12		0.102857			wTbhhnM18; UAS-Shits/+	16 h	7	6	0.0769231		6	17	0.478261		0.277592			wTbhhnM18; UAS-Shits/R15A04-G4	16 h	19	19	0		14	25	0.282051		0.141026
w1118; R15A04-G4/+	16 h	12	14	-0.0769231		16	20	0.111111		0.017094			wTbhhnM18; R15A04-G4/+	16 h	10	18	-0.285714		8	19	0.407407		0.0608466			wTbhhnM18; UAS-Shits/+	16 h	11	4	0.466667		18	19	0.027027		0.246847			wTbhhnM18; UAS-Shits/R15A04-G4	16 h	17	25	-0.190476		13	15	0.0714286		-0.0595238
w1118; R15A04-G4/+	16 h	11	30	-0.463415		15	21	0.166667		-0.148374			wTbhhnM18; R15A04-G4/+	16 h	18	18	0		15	24	0.230769		0.115385			wTbhhnM18; UAS-Shits/+	16 h	16	12	0.142857		11	15	0.153846		0.148352			wTbhhnM18; UAS-Shits/R15A04-G4	16 h	20	11	0.290323		12	11	-0.0434783		0.123422
w1118; R15A04-G4/+	16 h	15	20	-0.142857		13	17	0.133333		-0.0047619			wTbhhnM18; R15A04-G4/+	16 h	10	4	0.428571		14	17	0.0967742		0.262673			wTbhhnM18; UAS-Shits/+	16 h	16	15	0.0322581		12	13	0.04		0.036129			wTbhhnM18; UAS-Shits/R15A04-G4	16 h	26	28	-0.037037		20	23	0.0697674		0.0163652
w1118; R15A04-G4/+	16 h	13	29	-0.380952		12	32	0.454545		0.0367965			wTbhhnM18; R15A04-G4/+	16 h	11	13	-0.0833333		7	18	0.44		0.178333			wTbhhnM18; UAS-Shits/+	16 h	6	3	0.333333		5	9	0.285714		0.309524			wTbhhnM18; UAS-Shits/R15A04-G4	16 h	12	22	-0.294118		16	25	0.219512		-0.0373027
w1118; R15A04-G4/+	16 h	22	14	0.222222		17	20	0.0810811		0.151652			wTbhhnM18; R15A04-G4/+	16 h	18	17	0.0285714		18	26	0.181818		0.105195			wTbhhnM18; UAS-Shits/+	16 h	15	7	0.363636		12	9	-0.142857		0.11039			wTbhhnM18; UAS-Shits/R15A04-G4	16 h	14	12	0.0769231		7	8	0.0666667		0.0717949
w1118; R15A04-G4/+	16 h	19	39	-0.344828		19	23	0.0952381		-0.124795			wTbhhnM18; R15A04-G4/+	16 h	9	14	-0.217391		7	16	0.391304		0.0869565			wTbhhnM18; UAS-Shits/+	16 h	17	11	0.214286		15	13	-0.0714286		0.0714286			wTbhhnM18; UAS-Shits/R15A04-G4	16 h	14	15	-0.0344828		12	16	0.142857		0.0541872
w1118; R15A04-G4/+	16 h	22	26	-0.0833333		19	31	0.24		0.0783333			wTbhhnM18; R15A04-G4/+	16 h	11	11	0		7	14	0.333333		0.166667			wTbhhnM18; UAS-Shits/+	16 h	13	10	0.130435		17	19	0.0555556		0.0929952			wTbhhnM18; UAS-Shits/R15A04-G4	16 h	16	10	0.230769		16	16	0		0.115385
w1118; R15A04-G4/+	16 h	12	40	-0.538462		19	23	0.0952381		-0.221612			wTbhhnM18; R15A04-G4/+	16 h	16	13	0.103448		6	9	0.2		0.151724			wTbhhnM18; UAS-Shits/+	16 h	13	13	0		10	13	0.130435		0.0652174			wTbhhnM18; UAS-Shits/R15A04-G4	16 h	11	19	-0.266667		7	15	0.363636		0.0484848
w1118; R15A04-G4/+	16 h	18	33	-0.294118		17	23	0.15		-0.0720588			wTbhhnM18; R15A04-G4/+	16 h	15	9	0.25		5	17	0.545455		0.397727			wTbhhnM18; UAS-Shits/+	16 h	4	5	-0.111111		10	21	0.354839		0.121864
w1118; R15A04-G4/+	16 h	18	34	-0.307692		3	7	0.4		0.0461538																wTbhhnM18; UAS-Shits/+	16 h	15	11	0.153846		3	8	0.454545		0.304196

## Sheet: Sensory acuity
At 31°C
Genotype	3-Oct [1:100]	MCH [1:100]	Balance	Sucrose preference 2 M	N
w1118; R15A04	-0,33 ± 0,03a	-0,11 ± 0,1a	-0,11 ± 0,11	0,71 ± 0,07a	9 - 24
w1118, TβhnM18; R15A04	-0,30 ± 0,04a	-0,53 ± 0,06a	-0,10 ± 0,06	0,64 ± 0,06a	9 - 24
w1118, TβhnM18; UAS-Shits	-0,29 ± 0,05a	-0,50 ± 0,04a	0,07 ± 0,08	0,80 ± 0,06a	9 - 24
w1118, TβhnM18; UAS-Shits; R15A04	-0,21 ± 0,04a	-0,36 ± 0,06a	-0,06 ± 0,07	0,78 ± 0,05a	9 - 24
a =difference from random choice

## Sheet: Figure 2- figure suppl 1
Figure S1	for Figure 2B
	Training	no HS		Test
	STM		5 h 30
	20°C	20°C	20°C	20°C
			2 M Sucrose					2 M Sucrose							2 M Sucrose					2 M Sucrose								2 M Sucrose					2 M Sucrose
			Reinforced					Reinforced							Reinforced					Reinforced								Reinforced					Reinforced
	Genotype	Starvation	3OCT	MCH	AI		3OCT	MCH	AI		LI		Genotype	Starvation	3OCT	MCH	AI		3OCT	MCH	AI		LI			Genotype	Starvation	3OCT	MCH	AI		3OCT	MCH	AI		LI
	wTbhhnM18; R15A04-G4/+	16 h	14	10	0.166667		9	15	0.25		0.208333		wTbhhnM18; UAS-Shits/+	16 h	18	17	0.0285714		14	32	0.391304		0.209938			wTbhhnM18; UAS-Shits/R15A04-G4	16 h	19	7	0.461538		12	25	0.351351		0.406445
	wTbhhnM18; R15A04-G4/+	16 h	18	18	0		26	28	0.037037		0.0185185		wTbhhnM18; UAS-Shits/+	16 h	25	19	0.136364		13	17	0.133333		0.134848			wTbhhnM18; UAS-Shits/R15A04-G4	16 h	21	8	0.448276		16	12	-0.142857		0.152709
	wTbhhnM18; R15A04-G4/+	16 h	23	18	0.121951		23	23	0		0.0609756		wTbhhnM18; UAS-Shits/+	16 h	27	20	0.148936		21	23	0.0454545		0.0971954			wTbhhnM18; UAS-Shits/R15A04-G4	16 h	29	18	0.234043		28	15	-0.302326		-0.0341415
	wTbhhnM18; R15A04-G4/+	16 h	13	12	0.04		18	18	0		0.02		wTbhhnM18; UAS-Shits/+	16 h	21	32	-0.207547		21	20	-0.0243902		-0.115969			wTbhhnM18; UAS-Shits/R15A04-G4	16 h	25	14	0.282051		27	29	0.0357143		0.158883
	wTbhhnM18; R15A04-G4/+	16 h	13	11	0.0833333		26	23	-0.0612245		0.0110544		wTbhhnM18; UAS-Shits/+	16 h	24	13	0.297297		25	11	-0.388889		-0.0457958			wTbhhnM18; UAS-Shits/R15A04-G4	16 h	18	21	-0.0769231		18	29	0.234043		0.0785597
	wTbhhnM18; R15A04-G4/+	16 h	28	12	0.4		8	16	0.333333		0.366667		wTbhhnM18; UAS-Shits/+	16 h	24	21	0.0666667		20	35	0.272727		0.169697			wTbhhnM18; UAS-Shits/R15A04-G4	16 h	14	13	0.037037		10	24	0.411765		0.224401
	wTbhhnM18; R15A04-G4/+	16 h	25	10	0.428571		9	12	0.142857		0.285714		wTbhhnM18; UAS-Shits/+	16 h	30	15	0.333333		23	24	0.0212766		0.177305			wTbhhnM18; UAS-Shits/R15A04-G4	16 h	15	8	0.304348		25	26	0.0196078		0.161978
	wTbhhnM18; R15A04-G4/+	16 h	14	8	0.272727		21	15	-0.166667		0.0530303		wTbhhnM18; UAS-Shits/+	16 h	15	30	-0.333333		11	28	0.435897		0.0512821			wTbhhnM18; UAS-Shits/R15A04-G4	16 h	21	15	0.166667		15	19	0.117647		0.142157
	wTbhhnM18; R15A04-G4/+	16 h	20	17	0.0810811		17	18	0.0285714		0.0548263		wTbhhnM18; UAS-Shits/+	16 h	14	25	-0.282051		8	33	0.609756		0.163852			wTbhhnM18; UAS-Shits/R15A04-G4	16 h	29	8	0.567568		16	21	0.135135		0.351351
	wTbhhnM18; R15A04-G4/+	16 h	29	13	0.380952		10	21	0.354839		0.367896		wTbhhnM18; UAS-Shits/+	16 h	34	18	0.307692		13	17	0.133333		0.220513			wTbhhnM18; UAS-Shits/R15A04-G4	16 h	20	19	0.025641		13	24	0.297297		0.161469
	wTbhhnM18; R15A04-G4/+	16 h	15	16	-0.0322581		7	28	0.6		0.283871		wTbhhnM18; UAS-Shits/+	16 h	13	29	-0.380952		12	25	0.351351		-0.0148005			wTbhhnM18; UAS-Shits/R15A04-G4	16 h	17	4	0.619048		11	18	0.241379		0.430213
	wTbhhnM18; R15A04-G4/+	16 h	21	9	0.4		11	22	0.333333		0.366667															wTbhhnM18; UAS-Shits/R15A04-G4	16 h	9	17	-0.307692		5	17	0.545455		0.118881
	wTbhhnM18; R15A04-G4/+	16 h	11	18	-0.241379		10	16	0.230769		-0.00530504															wTbhhnM18; UAS-Shits/R15A04-G4	16 h	11	15	-0.153846		12	19	0.225806		0.0359801
