# Supplementary material for: Octopamine integrates the status of internal energy supply into the formation of food-related memories
Source: eLife. 2024 Apr 24;12:RP88247. doi: 10.7554/eLife.88247 (PMC11042807; doi:10.7554/eLife.88247)
Supplement: Figure 3—source data 1. [file elife-88247-fig3-data1.xlsx]

## Sheet: Figure 3
Figure 3A
			2 M Sucrose					2 M Sucrose									2 M Sucrose					2 M Sucrose
			Reinforced					Reinforced									Reinforced					Reinforced
Genotype	Starvation	Feeding	3OCT	MCH	AI		3OCT	MCH	AI		LI			Genotype	Starvation	Feeding	3OCT	MCH	AI		3OCT	MCH	AI		LI
w1118	16 h	H2O	18	6	0.5		16	16	0		0.25			w1118	16 h	3 mM Epinastine 1 h	16	11	0.185185		8	20	0.428571		0.306878
w1118	16 h	H2O	20	11	0.290323		10	8	-0.111111		0.0896057			w1118	16 h	3 mM Epinastine 1 h	27	7	0.588235		10	15	0.2		0.394118
w1118	16 h	H2O	19	14	0.151515		11	24	0.371429		0.261472			w1118	16 h	3 mM Epinastine 1 h	12	3	0.6		13	23	0.277778		0.438889
w1118	16 h	H2O	19	10	0.310345		11	11	0		0.155172			w1118	16 h	3 mM Epinastine 1 h	24	19	0.116279		13	26	0.333333		0.224806
w1118	16 h	H2O	21	17	0.105263		13	12	-0.04		0.0326316			w1118	16 h	3 mM Epinastine 1 h	4	14	-0.555556		6	22	0.571429		0.00793651
w1118	16 h	H2O	5	13	-0.444444		6	21	0.555556		0.0555556			w1118	16 h	3 mM Epinastine 1 h	19	25	-0.136364		16	23	0.179487		0.0215618
w1118	16 h	H2O	12	15	-0.111111		14	17	0.0967742		-0.00716846			w1118	16 h	3 mM Epinastine 1 h	21	17	0.105263		2	16	0.777778		0.44152
w1118	16 h	H2O	18	15	0.0909091		12	21	0.272727		0.181818			w1118	16 h	3 mM Epinastine 1 h	11	7	0.222222		5	17	0.545455		0.383838
w1118	16 h	H2O	15	21	-0.166667		20	21	0.0243902		-0.0711382			w1118	16 h	3 mM Epinastine 1 h	23	23	0		15	25	0.25		0.125
w1118	16 h	H2O	20	16	0.111111		12	18	0.2		0.155556			w1118	16 h	3 mM Epinastine 1 h	28	20	0.166667		27	32	0.0847458		0.125706
w1118	16 h	H2O	16	17	-0.030303		29	30	0.0169492		-0.00667694			w1118	16 h	3 mM Epinastine 1 h	19	24	-0.116279		13	23	0.277778		0.0807494
w1118	16 h	H2O	17	13	0.133333		17	22	0.128205		0.130769			w1118	16 h	3 mM Epinastine 1 h	16	15	0.0322581		9	37	0.608696		0.320477
														w1118	16 h	3 mM Epinastine 1 h	21	18	0.0769231		8	17	0.36		0.218462
			2 M Sucrose					2 M Sucrose									2 M Sucrose					2 M Sucrose
			Reinforced					Reinforced								after training	Reinforced					Reinforced
Genotype	Starvation	Feeding	3OCT	MCH	AI		3OCT	MCH	AI		LI			Genotype	Starvation	Feeding	3OCT	MCH	AI		3OCT	MCH	AI		LI
Tbhnm18	16 h	H2O	14	28	-0.333333		10	20	0.333333		0			Tbhnm18	16 h	3 mM OA 6h	8	19	-0.407407		4	10	0.428571		0.010582
Tbhnm18	16 h	H2O	13	39	-0.5		2	9	0.636364		0.0681818			Tbhnm18	16 h	3 mM OA 6h	8	24	-0.5		7	25	0.5625		0.03125
Tbhnm18	16 h	H2O	11	12	-0.0434783		3	9	0.5		0.228261			Tbhnm18	16 h	3 mM OA 6h	11	23	-0.352941		9	25	0.470588		0.0588235
Tbhnm18	16 h	H2O	8	14	-0.272727		6	27	0.636364		0.181818			Tbhnm18	16 h	3 mM OA 6h	2	13	-0.733333		3	16	0.684211		-0.0245614
Tbhnm18	16 h	H2O	3	7	-0.4		8	28	0.555556		0.0777778			Tbhnm18	16 h	3 mM OA 6h	5	8	-0.230769		6	15	0.428571		0.0989011
Tbhnm18	16 h	H2O	13	27	-0.35		0	21	1		0.325			Tbhnm18	16 h	3 mM OA 6h	6	15	-0.428571		7	23	0.533333		0.052381
Tbhnm18	16 h	H2O	11	16	-0.185185		10	34	0.545455		0.180135			Tbhnm18	16 h	3 mM OA 6h	11	19	-0.266667		18	24	0.142857		-0.0619048
Tbhnm18	16 h	H2O	16	14	0.0666667		9	30	0.538462		0.302564			Tbhnm18	16 h	3 mM OA 6h	14	15	-0.0344828		9	28	0.513514		0.239515
Figure 3B
3-Oct [1:100]; MCH [1:100]			2 M Sucrose														2 M Sucrose					2 M Sucrose
			Reinforced					Reinforced								before training	Reinforced					Reinforced
Genotype	Starvation	Feeding	3OCT	MCH	AI		3OCT	MCH	AI		LI			Genotype	Starvation	Feeding	3OCT	MCH	AI		3OCT	MCH	AI		LI
w1118	16 h	H2O 30 min.	10	9	0.0526316		6	20	0.538462		0.295547			w1118	16 h	3 mM OA 30 min.	11	15	-0.153846		10	8	-0.111111		-0.132479
w1118	16 h	H2O 30 min.	13	6	0.368421		8	23	0.483871		0.426146			w1118	16 h	3 mM OA 30 min.	16	16	0		13	26	0.333333		0.166667
w1118	16 h	H2O 30 min.	17	13	0.133333		17	29	0.26087		0.197101			w1118	16 h	3 mM OA 30 min.	35	12	0.489362		13	28	0.365854		0.427608
w1118	16 h	H2O 30 min.	19	12	0.225806		13	39	0.5		0.362903			w1118	16 h	3 mM OA 30 min.	27	14	0.317073		9	10	0.0526316		0.184852
w1118	16 h	H2O 30 min.	19	10	0.310345		14	20	0.176471		0.243408			w1118	16 h	3 mM OA 30 min.	20	20	0		21	13	-0.235294		-0.117647
w1118	16 h	H2O 30 min.	23	21	0.0454545		8	14	0.272727		0.159091			w1118	16 h	3 mM OA 30 min.	21	16	0.135135		8	22	0.466667		0.300901
w1118	16 h	H2O 30 min.	18	13	0.16129		14	25	0.282051		0.221671			w1118	16 h	3 mM OA 30 min.	20	17	0.0810811		15	13	-0.0714286		0.00482625
w1118	16 h	H2O 30 min.	16	15	0.0322581		10	17	0.259259		0.145759			w1118	16 h	3 mM OA 30 min.	23	23	0		17	22	0.128205		0.0641026
w1118	16 h	H2O 30 min.	19	16	0.0857143		8	29	0.567568		0.326641			w1118	16 h	3 mM OA 30 min.	18	15	0.0909091		17	26	0.209302		0.150106
w1118	16 h	H2O 30 min.	20	15	0.142857		9	30	0.538462		0.340659			w1118	16 h	3 mM OA 30 min.	15	16	-0.0322581		14	13	-0.037037		-0.0346476

## Sheet: Figure 3- figure suppl. 2 
Figure S2
OA	17 h + 1h OA			TA	17 h + 1h TA
	3h 5% sucrose				3h 5% sucrose
	H2O	10mg/ml OA			H2O	10 mg/ml TA	100 mg/ml TA
	0.690485	0.0345294			0.2415	0.186531	0.251058
	0.501036	0.0480789			0.295625	0.351233	0.278922
	0.529331	0.0566311			0.314415	0.366184	0.389748
	0.469503	0.0473076			0.36976	0.37004	0.39606
	0.566303	0.0340537			0.392254	0.381353	0.404904
	0.702312	0.119406			0.468165	0.402539	0.407012
	0.702878	0.0458292			0.507747	0.423238	0.414828
	0.476414	0.0103957			0.525329	0.427697	0.437248
	0.564072	0.0542837			0.587141	0.498131	0.446157
	0.438719	0.0932896			0.592232	0.499842	0.449869
	0.540523	0.0627111			0.606218	0.52514	0.453806
	0.502072	0.0486969			0.608944	0.576343	0.544924
	0.664477	0.1249			0.611494	0.58421	0.545937
					0.613893	0.598454	0.570751
					0.637259	0.619755	0.571715
					0.726441	0.625405	0.579852
					0.734257	0.629754	0.58817
					0.752496	0.669735	0.602979
					0.82805	0.767111	0.603429
					0.838591	0.772103	0.705459
Mean	0.56524	0.0600086			0.562591	0.51374	0.482141
SEM	0.156769	0.0166434			0.125799	0.114876	0.10781
