# Supplementary material for: Octopamine integrates the status of internal energy supply into the formation of food-related memories
Source: eLife. 2024 Apr 24;12:RP88247. doi: 10.7554/eLife.88247 (PMC11042807; doi:10.7554/eLife.88247)
Supplement: Figure 4—source data 1. [file elife-88247-fig4-data1.xlsx]

## Sheet: Figure 4
Figure 4A
Glycogen content
whole body
Genotype	Starvation	per mg fly (µg/mg)		Genotype	Starvation	per mg fly (µg/mg)
w1118	0 h	2.22105		TßhnM18	0 h	2.99134
w1118	0 h	2.20322		TßhnM18	0 h	2.82714
w1118	0 h	2.00714		TßhnM18	0 h	2.66294
Genotype	Starvation	per mg fly (µg/mg)		Genotype	Starvation	per mg fly (µg/mg)
w1118	16 h	1.88682		TßhnM18	16 h	2.42147
w1118	16 h	1.94475		TßhnM18	16 h	2.23312
w1118	16 h	1.93584		TßhnM18	16 h	2.18
Genotype	Starvation	per mg fly (µg/mg)		Genotype	Starvation	per mg fly (µg/mg)
w1118	40 h	1.56151		TßhnM18	40 h	1.66808
w1118	40 h	1.40553		TßhnM18	40 h	1.82262
w1118	40 h	1.3788		TßhnM18	40 h	1.90472
Figure 4B
									µl/mg fly
	w1118				w1118				w1118				Tbhnm18				Tbhnm18				Tbhnm18						PI Sucrose								Total intake
	sated				18h starved				40h starved				sated				18h starved				40h starved						w1118	w1118	w1118	Tbhnm18	Tbhnm18	Tbhnm18			w1118	w1118	w1118	Tbhnm18	Tbhnm18	Tbhnm18
	5% Yeast	5% Sucrose	PI Sucrose	total intake	5% Yeast	5% Sucrose	PI Sucrose	total intake	5% Yeast	5% Sucrose	PI Sucrose	total intake	5% Yeast	5% Sucrose	PI Sucrose	total intake	5% Yeast	5% Sucrose	PI Sucrose	total intake	5% Yeast	5% Sucrose	PI Sucrose	total intake			sated	18h starved	40h starved	sated	18h starved	40h starved			sated	18h starved	40h starved	sated	18h starved	40h starved
	0.16025	0.574263	56.3656	0.734514	0.114726	0.954426	78.5389	1.06915	0.499971	0.412686	-9.56382	0.912657	0	0.285866	100	0.285866	0.42971	1.06781	42.6105	1.49752	0.591606	1.33084	38.4527	1.92244		MEAN	87.9662	53.845	38.7551	73.759	37.5314	30.6338		MEAN	1.90942	1.11388	0.737925	2.81089	1.50649	0.73039
	0.000561156	0.483116	99.768	0.483677	0.333246	0.881059	45.1134	1.2143	0.702338	0.543106	-12.7852	1.24544	0.0191128	0.463224	92.0749	0.482336	0.107356	0.80421	76.4459	0.911566	0.757236	0.9934	13.4902	1.75064		STDEV	23.1899	37.0214	34.6718	22.6881	30.5454	25.4668		STDEV	1.0364	0.360461	0.196644	1.00106	0.48344	0.313759
	0.0262942	0.658317	92.3185	0.684611	0.0761328	0.561907	76.1354	0.63804	0.108312	0.45528	61.5637	0.563592	0.117239	0.292773	42.8117	0.410012	0.696615	0.737987	2.88385	1.4346	0.864544	1.21635	16.9064	2.08089		SEM	3.86498	6.00566	5.4821	4.0749	5.16312	4.30468		SEM	0.163869	0.0584745	0.0327739	0.16921	0.0817162	0.0563528
	0.0039281	0.233241	96.6875	0.237169	0.251844	0.605901	41.2776	0.857745	0.739024	0.724535	-0.98998	1.46356	0.0286257	0.397024	86.5496	0.42565	0.249858	1.40424	69.7893	1.6541	0.840985	1.13504	14.8811	1.97603
	0	0.571858	100	0.571858	0.330216	0.842071	43.6629	1.17229	0.578211	0.428053	-14.9223	1.00626	0	0.0464787	100	0.0464787	0.0860953	0.604678	75.0728	0.690773	0.934359	1.14711	10.2211	2.08147
	0.132233	0.694992	68.0298	0.827225	-0.0609852	-0.0194942	-51.5548	-0.0804795	0.235204	0.703855	49.9065	0.939059	0.13266	0.784492	71.0713	0.917151	0.682537	0.93048	15.3714	1.61302	1.52092	3.81092	42.9495	5.33184
	0.0493818	0.939576	90.0134	0.988958	0.177424	0.852345	65.5411	1.02977	0.533731	0.594216	5.36237	1.12795	0.0562957	0.670206	84.5022	0.726502	0.79042	0.488607	-23.597	1.27903	1.24128	1.86568	20.097	3.10696
	0.273524	0.611661	38.1996	0.885184	0.402002	0.461934	6.93703	0.863936	0.701116	0.348599	-33.5821	1.04971	0.122104	0.589411	65.6777	0.711516	0.590744	1.48368	43.0451	2.07443	0.215439	0.72638	54.2504	0.941819
	0	0.65976	100	0.65976	0.506454	0.638435	11.5278	1.14489	0.652042	0.47099	-16.1217	1.12303	0.00664602	0.664081	98.0183	0.670727	0.975012	1.37537	17.0337	2.35038	1.75734	2.74222	21.8883	4.49956
	0.0535904	0.703169	85.8369	0.75676	0.107745	0.820337	76.7812	0.928082	0.835297	0.985024	8.22531	1.82032	0.0826192	0.689493	78.5992	0.772112	0.983775	1.00618	1.12614	1.98996	1.69268	1.24203	-15.3561	2.93471
	0	0.647855	100	0.647855	-0.113628	0.495039	159.583	0.38141	0.264899	1.23592	64.6995	1.50082	0.10803	0.544192	66.8731	0.652223	0.885342	2.23931	43.3318	3.12465	1.76182	1.38557	-11.9544	3.14739
	0.0104215	0.570776	96.4138	0.581198	0.11938	1.03126	79.2498	1.15064	0.427702	1.32637	51.2332	1.75407	0.0324482	0.224922	74.7848	0.257371	0.533427	0.966824	28.8883	1.50025	1.74115	1.23119	-17.1569	2.97235
	0.0278574	0.900856	94.0009	0.928714	0.46066	0.634264	15.8553	1.09492	0.341588	0.585133	26.2804	0.926721	0.368007	0.682846	29.9603	1.05085	0.286633	0.991101	55.1342	1.27773	0.8697	3.5558	60.6959	4.4255
	0	0.703049	100	0.703049	0.0628732	0.9031	86.9824	0.965973	0.904912	1.49696	24.6495	2.40188	0.146082	1.13686	77.227	1.28294	0.640735	0.855494	14.3534	1.49623	1.31508	0.915157	-17.932	2.23024
	0	0.954848	100	0.954848	0.320381	1.05642	53.46	1.3768	0.883854	3.21087	56.8296	4.09472	0.277309	0.800911	48.5618	1.07822	0.742727	1.00288	14.9033	1.74561	1.03953	1.27588	10.2079	2.31541
	0.0590016	0.77628	85.8726	0.835281	0.167984	0.576308	54.8608	0.744292	0.514147	0.673028	13.3831	1.18718	0.0531682	0.61391	84.0594	0.667078	0.273704	1.23904	63.8136	1.51275	0.94708	1.42266	20.069	2.36974
	0	0.447162	100	0.447162	0.282578	0.865429	50.7706	1.14801	0.503205	1.33224	45.1679	1.83544	0.0345333	0.732627	90.9971	0.76716	0.497801	0.834234	25.257	1.33203	1.1065	4.26971	58.8372	5.37621
	0	0.492254	100	0.492254	0.282578	1.06854	58.1711	1.35112	0.474944	1.20729	43.5342	1.68224	0.00299723	0.541977	98.9	0.544974	0.609275	1.23488	33.9236	1.84415	0.574479	2.59825	63.7864	3.17272
	0.414454	0.280017	-19.3582	0.694471	0.62478	0.869117	16.3556	1.4939	0.993116	1.27025	12.2443	2.26336	0.0461312	0.693532	87.5264	0.739663	0.403997	0.963664	40.9215	1.36766	0.22606	1.90363	78.7706	2.12968
	0.0109025	0.546967	96.0914	0.55787	0.166667	0.637689	58.559	0.804355	0.632552	0.914954	18.2489	1.54751	0.02072	0.799478	94.9476	0.820198	0.179038	1.52333	78.966	1.70237	0.536587	1.96075	57.0273	2.49734
	0	0.758603	100	0.758603	0.0337197	1.1603	94.3519	1.19402	0.702889	1.21395	26.6618	1.91684	0.017853	0.659129	94.7257	0.676982	0.560114	1.52335	46.2323	2.08346	0.344317	1.12348	53.0839	1.4678
	0	0.655671	100	0.655671	0.21246	1.3372	72.5797	1.54966	0.290189	1.67463	70.4615	1.96482	0.035098	0.727979	90.8009	0.763077	0.317375	1.61512	67.154	1.9325	0.327398	1.99529	71.8087	2.32269
	0	0.59194	100	0.59194	0.147787	0.963383	73.3997	1.11117	0.597822	0.511837	-7.7488	1.10966	0.124103	0.430341	55.2335	0.554444	0.285915	0.876898	50.8236	1.16281	0.95372	2.48026	44.4539	3.43398
	0	0.856846	100	0.856846	0.668335	0.744468	5.38877	1.4128	0.587285	1.7954	50.7039	2.38268	0.0973882	0.575772	71.0654	0.67316	0.208056	0.837681	60.2088	1.04574	0.869763	3.0389	55.4957	3.90867
	0.0638115	1.05513	88.5944	1.11895	0.783983	0.755796	-1.83062	1.53978	0.458277	0.631693	15.9101	1.08997	0.487158	0.793005	23.8913	1.28016	0.406582	1.22525	50.1687	1.63184	0.654382	2.02396	51.1353	2.67834
	0.0123454	0.852878	97.1463	0.865223	0.244731	1.08246	63.1203	1.32719	0.176045	1.89638	83.0107	2.07243	0.176098	0.654742	57.6097	0.83084	0.491097	0.97506	33.0089	1.46616	1.09641	1.77253	23.5669	2.86895
	0.124336	0.716677	70.4318	0.841013	0.774763	0.702845	-4.86718	1.47761	0.257874	2.13283	78.427	2.3907	0.0306673	1.54661	96.1114	1.57728	0.501584	0.09074	-69.3614	0.592324	0.512039	1.44271	47.6108	1.95475
	0	0.985792	100	0.985792	0.155163	1.35458	79.4451	1.50975	0.432648	2.60441	71.5087	3.03706	0.152381	0.641711	61.6214	0.794091	0.258382	0.833276	52.6625	1.09166	1.63887	2.26606	16.0613	3.90493
	0	0.717278	100	0.717278	0.134045	1.10586	78.3782	1.2399	1.24211	1.23624	-0.236885	2.47835	0.101167	0.539805	68.4332	0.640972	0.512932	1.03367	33.6698	1.5466	1.31221	1.55441	8.44887	2.86662
	0.0192396	0.64056	94.168	0.6598	0.427511	0.743502	26.9844	1.17101	0.502915	1.62178	52.6599	2.12469	0.0681978	0.478557	75.0536	0.546755	0.399304	0.565653	17.239	0.964957	0.715851	1.37156	31.4125	2.08741
	0.105938	0.62096	70.8519	0.726898	0.231384	1.07332	64.5309	1.30471	0.362604	2.74898	76.6933	3.11158	0.403887	0.591409	18.8408	0.995297	0.546196	1.33954	42.0707	1.88573	0.702617	1.40057	33.1856	2.10319
	0	1.08139	100	1.08139	0.44042	0.624429	17.2803	1.06485	1.12979	4.26941	58.1498	5.39919					0.329346	0.933688	47.8485	1.26303	1.09275	1.5699	17.9202	2.66265
	0.0149107	0.550615	94.7268	0.565525	0.154856	0.939498	71.6991	1.09435	1.30418	3.48437	45.5292	4.78855					0.110277	0.987271	79.9049	1.09755	0.831265	2.37236	48.1047	3.20363
	0.0352326	0.707298	90.5101	0.74253	0.188312	0.982833	67.8413	1.17115	0.156154	1.30834	78.6747	1.4645					0.256083	0.992011	58.9641	1.24809	1.08861	1.68758	21.5752	2.77619
	0.0594024	0.537989	80.1127	0.597391	0.0638391	0.833597	85.773	0.897436	0.349701	1.0458	49.8817	1.3955					0.501871	0.81417	23.7302	1.31604	1.03353	1.84487	28.1874	2.8784
	0	1.12804	100	1.12804	0.0879434	0.801853	80.2329	0.889796	0.13043	2.29446	89.2424	2.42489
					0.27327	1.79882	73.6238	2.07209	0.132537	0.874371	73.6744	1.00691
					0.140894	0.810151	70.3707	0.951045	0.257932	2.14553	78.5366	2.40347
									0.145466	1.05725	75.8104	1.20272
									0.116029	2.0507	89.29	2.16673
MEAN	0.0460449	0.69188	87.9662	0.737925	0.257276	0.856605	53.845	1.11388	0.521476	1.38794	38.7551	1.90942	0.108023	0.622367	73.759	0.73039	0.466569	1.03993	37.5314	1.50649	0.963089	1.8478	30.6338	2.81089
STDEV	0.0862223	0.20433	23.1899	0.196644	0.210008	0.299944	37.0214	0.360461	0.311085	0.916219	34.6718	1.0364	0.121882	0.26769	22.6881	0.313759	0.237358	0.380927	30.5454	0.48344	0.436229	0.833825	25.4668	1.00106
SEM	0.0143704	0.034055	3.86498	0.0327739	0.0340678	0.0486573	6.00566	0.0584745	0.0491869	0.144867	5.4821	0.163869	0.0218906	0.0480785	4.0749	0.0563528	0.0401208	0.0643884	5.16312	0.0817162	0.0737361	0.140942	4.30468	0.16921
Figure 4C
Females	w1118				Females	Tbhnm18				Males	w1118				Males	Tbhnm18
	Standard food	5% sucrose	5% yeast			Standard food	5% sucrose	5% yeast			Standard food	5% sucrose	5% yeast			0.356299	0.306266	0.852373
	0.984707	0.512204	0.840123			-0.0227661	0.226007	0.387989			1	0.461989	1			0.990681	-0.325055	0.748521
	0.105577	-0.0442436	0.73814			-0.132259	0.0170981	0.708032			1	0.216344	1			0.842005	0.377596	0.912986
	0.103813	0.487415	0.757463			0.938394	-0.140136	0.491273			1	0.916394	1			1	0.317679	1
	0.427288	0.638467	-0.846971			-0.0192308	0.258878	0.774331			1	1	0.846026			0.9407	0.475255	0.926003
	0.295485	0.281069	0.898158			0.444899	0.266577	0.705007			1	1	-1			0.924642	0.276477	0.978906
	-0.0325839	-0.0238136	0.837901			-0.0123503	-0.00467189	0.556863			1	1	0.936942			0.842424	-0.104604	0.9567
	-0.0653429	-0.0777586	0.899673			0.201887	0.00905896	0.579227			0.946698	1	0.338107			0.853348	0.0254914	0.747111
	0.130254	0.333687	0.830016			0.147966	0.109566	0.687343			1	0.939222	0.99392			0.720919	0.409489	1
	0.743787	0.151353	0.53446			0.763251	0.446964	0.738684			1	0.936053	1			0.948319	0.000708239	0.765257
	0.143699	-0.195401	0.683029			-0.00676551	0.702976	0.532724			1	0.803625	1			1	0.328667	0.743152
	0.238778	0.591293	0.510092			0.197908	0.332173	0.792146			1	1	1			1	0.41354	0.939324
	-1	-0.22129	0.589325			-0.259523	0.23665	0.35655			1	1	0.95441			1	0.275112	1
	0.505107	0.538071	0.990719			0.810265	0.284374	0.494805			1	0.505115	1			1	0.204976	0.915958
	0.679285	0.353298	0.927445			0.638911	0.391467	0.401038			1	1	1			0.587183	0.364089	0.756628
	0.461882	0.263781				0.26706	0.16399	0.464712			1	1				1	0.175542
	0.360342	0.0491003				0.263013		0.289174			1	0.837744				1	1
	-0.0519696					0.488882					1	1				1	0.667405
	0.199179					0.692504					1	1				0.747888	0.885154
	0.0856229					0.154507					1	0.973078				0.955331	0.647334
	0.435764					-0.163445					1	0.438231				0.299088
											1					0.462465
	w1118	Females				Tbhnm18	Females				w1118	Males				Tbhnm18	Males
FOOD	Standard food	5% sucrose	5% yeast		FOOD	Standard food	5% sucrose	5% yeast		FOOD	Standard food	5% sucrose	5% yeast		FOOD	Standard food	5% sucrose	5% yeast
MEAN	0.237534	0.227327	0.656398		MEAN	0.269655	0.220065	0.559994		MEAN	0.997462	0.85139	0.790672		MEAN	0.862619	0.337624	0.885039
STDEV	0.402984	0.285851	0.457267		STDEV	0.353101	0.209774	0.159099		STDEV	0.0116315	0.240915	0.544514		STDEV	0.197609	0.322578	0.10691
SEM	0.09011	0.0714627	0.12221		SEM	0.0789558	0.0541635	0.0397747		SEM	0.0025382	0.0538701	0.145528		SEM	0.0431219	0.0740044	0.0285729
