# Supplementary material for: Octopamine integrates the status of internal energy supply into the formation of food-related memories
Source: eLife. 2024 Apr 24;12:RP88247. doi: 10.7554/eLife.88247 (PMC11042807; doi:10.7554/eLife.88247)
Supplement: Figure 5—source data 1. [file elife-88247-fig5-data1.xlsx]

## Sheet: Figure 5
Figure 5 B
	Training	Test
	STM	2 min
		2 M Sucrose					2 M Sucrose							2 M Sucrose					2 M Sucrose
		Reinforced					Reinforced							Reinforced					Reinforced
Genotype	Starvation	3OCT	MCH	AI		3OCT	MCH	AI		LI		Genotype	Starvation	3OCT	MCH	AI		3OCT	MCH	AI		LI
mef2-Gal4/+	16 h	35	26	0.147541		17	31	0.291667		0.219604		mef2-Gal4/+	16 h	20	15	0.142857		7	18	0.44		0.291429
mef2-Gal4/+	16 h	16	2	0.777778		8	15	0.304348		0.541063		mef2-Gal4/+	16 h	25	15	0.25		11	27	0.421053		0.335526
mef2-Gal4/+	16 h	26	14	0.3		22	27	0.102041		0.20102		mef2-Gal4/+	16 h	16	8	0.333333		11	22	0.333333		0.333333
mef2-Gal4/+	16 h	22	18	0.1		28	32	0.0666667		0.0833333		mef2-Gal4/+	16 h	11	8	0.157895		3	14	0.647059		0.402477
mef2-Gal4/+	16 h	16	11	0.185185		7	15	0.363636		0.274411		mef2-Gal4/+	16 h	11	9	0.1		4	9	0.384615		0.242308
mef2-Gal4/+	16 h	15	10	0.2		11	10	-0.047619		0.0761905		mef2-Gal4/+	16 h	16	8	0.333333		14	19	0.151515		0.242424
mef2-Gal4/+	16 h	13	6	0.368421		4	4	0		0.184211		mef2-Gal4/+	16 h	21	12	0.272727		12	18	0.2		0.236364
mef2-Gal4/+	16 h	33	27	0.1		14	38	0.461538		0.280769
		2 M Sucrose					2 M Sucrose							2 M Sucrose					2 M Sucrose
		Reinforced					Reinforced							Reinforced					Reinforced
Genotype	Starvation	3OCT	MCH	AI		3OCT	MCH	AI		LI		Genotype	Starvation	3OCT	MCH	AI		3OCT	MCH	AI		LI
UAS-GlyP-RNAi	16 h	11	7	0.222222		5	8	0.230769		0.226496		UAS-GlyS-RNAi	16 h	24	17	0.170732		11	25	0.388889		0.27981
UAS-GlyP-RNAi	16 h	15	10	0.2		3	11	0.571429		0.385714		UAS-GlyS-RNAi	16 h	9	12	-0.142857		5	13	0.444444		0.150794
UAS-GlyP-RNAi	16 h	21	13	0.235294		14	12	-0.0769231		0.0791855		UAS-GlyS-RNAi	16 h	29	20	0.183673		13	17	0.133333		0.158503
UAS-GlyP-RNAi	16 h	22	18	0.1		16	34	0.36		0.23		UAS-GlyS-RNAi	16 h	19	12	0.225806		9	22	0.419355		0.322581
UAS-GlyP-RNAi	16 h	21	19	0.05		23	23	0		0.025		UAS-GlyS-RNAi	16 h	20	6	0.538462		2	3	0.2		0.369231
UAS-GlyP-RNAi	16 h	25	28	-0.0566038		16	23	0.179487		0.0614417		UAS-GlyS-RNAi	16 h	10	6	0.25		17	17	0		0.125
UAS-GlyP-RNAi	16 h	10	6	0.25		5	15	0.5		0.375		UAS-GlyS-RNAi	16 h	9	4	0.384615		7	14	0.333333		0.358974
UAS-GlyP-RNAi	16 h	3	12	-0.6		4	17	0.619048		0.00952381
		2 M Sucrose					2 M Sucrose							2 M Sucrose					2 M Sucrose
		Reinforced					Reinforced							Reinforced					Reinforced
Genotype	Starvation	3OCT	MCH	AI		3OCT	MCH	AI		LI		Genotype	Starvation	3OCT	MCH	AI		3OCT	MCH	AI		LI
mef2-Gal4/UAS-GlyP-RNAi	16 h	4	3	0.142857		22	11	-0.333333		-0.0952381		mef2-Gal4/UAS-GlyS-RNAi	16 h	12	7	0.263158		8	17	0.36		0.311579
mef2-Gal4/UAS-GlyP-RNAi	16 h	6	18	-0.5		5	42	0.787234		0.143617		mef2-Gal4/UAS-GlyS-RNAi	16 h	20	10	0.333333		11	14	0.12		0.226667
mef2-Gal4/UAS-GlyP-RNAi	16 h	8	6	0.142857		4	13	0.529412		0.336134		mef2-Gal4/UAS-GlyS-RNAi	16 h	10	7	0.176471		4	24	0.714286		0.445378
mef2-Gal4/UAS-GlyP-RNAi	16 h	10	20	-0.333333		4	19	0.652174		0.15942		mef2-Gal4/UAS-GlyS-RNAi	16 h	26	9	0.485714		9	22	0.419355		0.452535
mef2-Gal4/UAS-GlyP-RNAi	16 h	7	12	-0.263158		0	13	1		0.368421		mef2-Gal4/UAS-GlyS-RNAi	16 h	28	7	0.6		7	24	0.548387		0.574194
mef2-Gal4/UAS-GlyP-RNAi	16 h	28	14	0.333333		14	16	0.0666667		0.2		mef2-Gal4/UAS-GlyS-RNAi	16 h	10	8	0.111111		2	28	0.866667		0.488889
												mef2-Gal4/UAS-GlyS-RNAi	16 h	10	1	0.818182		9	12	0.142857		0.480519
												mef2-Gal4/UAS-GlyS-RNAi	16 h	5	2	0.428571		3	19	0.727273		0.577922
												mef2-Gal4/UAS-GlyS-RNAi	16 h	11	10	0.047619		3	9	0.5		0.27381
												mef2-Gal4/UAS-GlyS-RNAi	16 h	23	9	0.4375		8	24	0.5		0.46875
Figure 5 C
	Training	Test
	STM	2 min
		2 M Sucrose					2 M Sucrose							2 M Sucrose					2 M Sucrose
		Reinforced					Reinforced							Reinforced					Reinforced
Genotype	Starvation	3OCT	MCH	AI		3OCT	MCH	AI		LI		Genotype	Starvation	3OCT	MCH	AI		3OCT	MCH	AI		LI
FB-Gal4/+	16 h	11	8	0.157895		5	17	0.545455		0.351675		FB-Gal4/+	16 h	14	7	0.333333		15	25	0.25		0.291667
FB-Gal4/+	16 h	6	9	-0.2		5	13	0.444444		0.122222		FB-Gal4/+	16 h	14	11	0.12		8	36	0.636364		0.378182
FB-Gal4/+	16 h	5	4	0.111111		1	7	0.75		0.430556		FB-Gal4/+	16 h	6	2	0.5		1	18	0.894737		0.697368
FB-Gal4/+	16 h	6	4	0.2		6	12	0.333333		0.266667		FB-Gal4/+	16 h	10	5	0.333333		3	12	0.6		0.466667
FB-Gal4/+	16 h	18	3	0.714286		7	25	0.5625		0.638393		FB-Gal4/+	16 h	19	10	0.310345		2	31	0.878788		0.594566
FB-Gal4/+	16 h	16	14	0.0666667		8	21	0.448276		0.257471		FB-Gal4/+	16 h	20	14	0.176471		10	17	0.259259		0.217865
		2 M Sucrose					2 M Sucrose							2 M Sucrose					2 M Sucrose
		Reinforced					Reinforced							Reinforced					Reinforced
Genotype	Starvation	3OCT	MCH	AI		3OCT	MCH	AI		LI		Genotype	Starvation	3OCT	MCH	AI		3OCT	MCH	AI		LI
UAS-GlyP-RNAi	16 h	9	5	0.285714		4	12	0.5		0.392857		UAS-GlyS-RNAi	16 h	8	5	0.230769		2	11	0.692308		0.461538
UAS-GlyP-RNAi	16 h	19	14	0.151515		2	16	0.777778		0.464646		UAS-GlyS-RNAi	16 h	28	20	0.166667		11	29	0.45		0.308333
UAS-GlyP-RNAi	16 h	11	20	-0.290323		15	22	0.189189		-0.0505667		UAS-GlyS-RNAi	16 h	22	11	0.333333		4	7	0.272727		0.30303
UAS-GlyP-RNAi	16 h	24	13	0.297297		8	12	0.2		0.248649		UAS-GlyS-RNAi	16 h	9	5	0.285714		3	20	0.73913		0.512422
UAS-GlyP-RNAi	16 h	13	9	0.181818		9	11	0.1		0.140909		UAS-GlyS-RNAi	16 h	11	3	0.571429		10	12	0.0909091		0.331169
UAS-GlyP-RNAi	16 h	8	11	-0.157895		4	19	0.652174		0.24714		UAS-GlyS-RNAi	16 h	13	16	-0.103448		2	30	0.875		0.385776
UAS-GlyP-RNAi	16 h	22	11	0.333333		11	14	0.12		0.226667		UAS-GlyS-RNAi	16 h	10	10	0		3	17	0.7		0.35
UAS-GlyP-RNAi	16 h	13	10	0.130435		0	16	1		0.565217		UAS-GlyS-RNAi	16 h	26	10	0.444444		2	17	0.789474		0.616959
UAS-GlyP-RNAi	16 h	42	7	0.714286		4	14	0.555556		0.634921		UAS-GlyS-RNAi	16 h	21	3	0.75		15	30	0.333333		0.541667
UAS-GlyP-RNAi	16 h	9	6	0.2		4	13	0.529412		0.364706		UAS-GlyS-RNAi	16 h	11	8	0.157895		2	19	0.809524		0.483709
UAS-GlyP-RNAi	16 h	14	3	0.647059		4	13	0.529412		0.588235		UAS-GlyS-RNAi	16 h	12	9	0.142857		1	10	0.818182		0.480519
UAS-GlyP-RNAi	16 h	17	22	-0.128205		2	22	0.833333		0.352564		UAS-GlyS-RNAi	16 h	16	16	0		13	33	0.434783		0.217391
UAS-GlyP-RNAi	16 h	30	6	0.666667		5	4	-0.111111		0.277778		UAS-GlyS-RNAi	16 h	5	2	0.428571		10	30	0.5		0.464286
UAS-GlyP-RNAi	16 h	15	10	0.2		2	14	0.75		0.475
UAS-GlyP-RNAi	16 h	11	8	0.157895		1	14	0.866667		0.512281
UAS-GlyP-RNAi	16 h	18	15	0.0909091		6	30	0.666667		0.378788
UAS-GlyP-RNAi	16 h
		2 M Sucrose					2 M Sucrose							2 M Sucrose					2 M Sucrose
		Reinforced					Reinforced							Reinforced					Reinforced
Genotype	Starvation	3OCT	MCH	AI		3OCT	MCH	AI		LI		Genotype	Starvation	3OCT	MCH	AI		3OCT	MCH	AI		LI
FB-Gal4/UAS-GlyP-RNAi	16 h	23	11	0.352941		9	21	0.4		0.376471		FB-Gal4/UAS-GlyS-RNAi	16 h	12	10	0.0909091		9	27	0.5		0.295455
FB-Gal4/UAS-GlyP-RNAi	16 h	3	5	-0.25		7	11	0.222222		-0.0138889		FB-Gal4/UAS-GlyS-RNAi	16 h	10	4	0.428571		8	13	0.238095		0.333333
FB-Gal4/UAS-GlyP-RNAi	16 h	5	3	0.25		2	6	0.5		0.375		FB-Gal4/UAS-GlyS-RNAi	16 h	8	5	0.230769		13	10	-0.130435		0.0501672
FB-Gal4/UAS-GlyP-RNAi	16 h	7	3	0.4		12	12	0		0.2		FB-Gal4/UAS-GlyS-RNAi	16 h	4	3	0.142857		2	5	0.428571		0.285714
FB-Gal4/UAS-GlyP-RNAi	16 h	13	13	0		9	19	0.357143		0.178571		FB-Gal4/UAS-GlyS-RNAi	16 h	12	5	0.411765		12	48	0.6		0.505882
FB-Gal4/UAS-GlyP-RNAi	16 h	10	12	-0.0909091		6	22	0.571429		0.24026		FB-Gal4/UAS-GlyS-RNAi	16 h	6	10	-0.25		2	7	0.555556		0.152778
FB-Gal4/UAS-GlyP-RNAi	16 h	7	4	0.272727		4	11	0.466667		0.369697		FB-Gal4/UAS-GlyS-RNAi	16 h	16	8	0.333333		4	20	0.666667		0.5
FB-Gal4/UAS-GlyP-RNAi	16 h	18	4	0.636364		1	20	0.904762		0.770563		FB-Gal4/UAS-GlyS-RNAi	16 h	13	15	-0.0714286		13	72	0.694118		0.311345
FB-Gal4/UAS-GlyP-RNAi	16 h	26	18	0.181818		2	13	0.733333		0.457576		FB-Gal4/UAS-GlyS-RNAi	16 h	18	10	0.285714		16	20	0.111111		0.198413
FB-Gal4/UAS-GlyP-RNAi	16 h	27	27	0		2	24	0.846154		0.423077		FB-Gal4/UAS-GlyS-RNAi	16 h	18	10	0.285714		11	25	0.388889		0.337302
FB-Gal4/UAS-GlyP-RNAi	16 h	4	17	-0.619048		5	14	0.473684		-0.0726817		FB-Gal4/UAS-GlyS-RNAi	16 h	9	1	0.8		4	22	0.692308		0.746154
FB-Gal4/UAS-GlyP-RNAi	16 h	7	4	0.272727		4	14	0.555556		0.414141		FB-Gal4/UAS-GlyS-RNAi	16 h	15	6	0.428571		5	6	0.0909091		0.25974
FB-Gal4/UAS-GlyP-RNAi	16 h	1	7	-0.75		3	2	-0.2		-0.475		FB-Gal4/UAS-GlyS-RNAi	16 h	16	8	0.333333		8	7	-0.0666667		0.133333
Figure 5 D
	Training	Test
	STM	2 min
		2 M Sucrose					2 M Sucrose							2 M Sucrose					2 M Sucrose
		Reinforced					Reinforced							Reinforced					Reinforced
Genotype	Starvation	3OCT	MCH	AI		3OCT	MCH	AI		LI		Genotype	Starvation	3OCT	MCH	AI		3OCT	MCH	AI		LI
mef2-Gal4; FB-Gal4/+	16 h	13	8	0.238095		12	17	0.172414		0.205255		mef2-Gal4; FB-Gal4/+	16 h	19	6	0.52		18	17	-0.0285714		0.245714
mef2-Gal4; FB-Gal4/+	16 h	10	6	0.25		10	14	0.166667		0.208333		mef2-Gal4; FB-Gal4/+	16 h	21	10	0.354839		8	20	0.428571		0.391705
mef2-Gal4; FB-Gal4/+	16 h	20	17	0.0810811		19	22	0.0731707		0.0771259		mef2-Gal4; FB-Gal4/+	16 h	17	5	0.545455		9	16	0.28		0.412727
mef2-Gal4; FB-Gal4/+	16 h	26	21	0.106383		23	26	0.0612245		0.0838037		mef2-Gal4; FB-Gal4/+	16 h	33	24	0.157895		10	22	0.375		0.266447
mef2-Gal4; FB-Gal4/+	16 h	17	15	0.0625		8	23	0.483871		0.273185		mef2-Gal4; FB-Gal4/+	16 h	30	14	0.363636		24	36	0.2		0.281818
mef2-Gal4; FB-Gal4/+	16 h	19	10	0.310345		10	13	0.130435		0.22039		mef2-Gal4; FB-Gal4/+	16 h	21	19	0.05		11	14	0.12		0.085
mef2-Gal4; FB-Gal4/+	16 h	20	16	0.111111		19	25	0.136364		0.123737		mef2-Gal4; FB-Gal4/+	16 h	22	13	0.257143		12	25	0.351351		0.304247
mef2-Gal4; FB-Gal4/+	16 h	16	12	0.142857		20	27	0.148936		0.145897		mef2-Gal4; FB-Gal4/+	16 h	32	12	0.454545		9	36	0.6		0.527273
mef2-Gal4; FB-Gal4/+	16 h	15	8	0.304348		6	17	0.478261		0.391304		mef2-Gal4; FB-Gal4/+	16 h	32	9	0.560976		16	22	0.157895		0.359435
mef2-Gal4; FB-Gal4/+	16 h	13	6	0.368421		5	22	0.62963		0.499025		mef2-Gal4; FB-Gal4/+	16 h	37	15	0.423077		18	41	0.389831		0.406454
mef2-Gal4; FB-Gal4/+	16 h	15	8	0.304348		14	19	0.151515		0.227931		mef2-Gal4; FB-Gal4/+	16 h	31	21	0.192308		10	15	0.2		0.196154
mef2-Gal4; FB-Gal4/+	16 h	27	20	0.148936		5	12	0.411765		0.28035
							2 M Sucrose							2 M Sucrose					2 M Sucrose
		Reinforced					Reinforced							Reinforced					Reinforced
Genotype	Starvation	3OCT	MCH	AI		3OCT	MCH	AI		LI		Genotype	Starvation	3OCT	MCH	AI		3OCT	MCH	AI		LI
UAS-GlyP-RNAi	16 h	27	16	0.255814		12	18	0.2		0.227907		UAS-GlyS-RNAi	16 h	18	13	0.16129		14	15	0.0344828		0.0978865
UAS-GlyP-RNAi	16 h	19	8	0.407407		14	20	0.176471		0.291939		UAS-GlyS-RNAi	16 h	10	25	-0.428571		12	26	0.368421		-0.0300752
UAS-GlyP-RNAi	16 h	39	25	0.21875		16	28	0.272727		0.245739		UAS-GlyS-RNAi	16 h	21	15	0.166667		4	21	0.68		0.423333
UAS-GlyP-RNAi	16 h	34	24	0.172414		29	45	0.216216		0.194315		UAS-GlyS-RNAi	16 h	15	7	0.363636		9	23	0.4375		0.400568
UAS-GlyP-RNAi	16 h	17	15	0.0625		26	35	0.147541		0.10502		UAS-GlyS-RNAi	16 h	17	4	0.619048		15	15	0		0.309524
UAS-GlyP-RNAi	16 h	25	17	0.190476		10	21	0.354839		0.272657		UAS-GlyS-RNAi	16 h	16	15	0.0322581		7	35	0.666667		0.349462
UAS-GlyP-RNAi	16 h	25	14	0.282051		20	40	0.333333		0.307692		UAS-GlyS-RNAi	16 h	24	8	0.5		16	18	0.0588235		0.279412
UAS-GlyP-RNAi	16 h	15	10	0.2		6	17	0.478261		0.33913		UAS-GlyS-RNAi	16 h	20	17	0.0810811		3	18	0.714286		0.397683
UAS-GlyP-RNAi	16 h	17	14	0.0967742		16	26	0.238095		0.167435		UAS-GlyS-RNAi	16 h	13	9	0.181818		20	27	0.148936		0.165377
UAS-GlyP-RNAi	16 h	12	7	0.263158		13	21	0.235294		0.249226		UAS-GlyS-RNAi	16 h	19	16	0.0857143		5	18	0.565217		0.325466
UAS-GlyP-RNAi	16 h	14	10	0.166667		9	21	0.4		0.283333		UAS-GlyS-RNAi	16 h	17	12	0.172414		20	27	0.148936		0.160675
UAS-GlyP-RNAi	16 h	18	7	0.44		8	27	0.542857		0.491429
							2 M Sucrose							2 M Sucrose					2 M Sucrose
		Reinforced					Reinforced							Reinforced					Reinforced
Genotype	Starvation	3OCT	MCH	AI		3OCT	MCH	AI		LI		Genotype	Starvation	3OCT	MCH	AI		3OCT	MCH	AI		LI
mef2-G4;FB-G4/UAS-GlyP-RNAi	16 h	21	21	0		4	12	0.5		0.25		mef2-G4;FB-G4/UAS-GlyS-RNAi	16 h	17	9	0.307692		9	20	0.37931		0.343501
mef2-G4;FB-G4/UAS-GlyP-RNAi	16 h	10	17	-0.259259		7	11	0.222222		-0.0185185		mef2-G4;FB-G4/UAS-GlyS-RNAi	16 h	16	11	0.185185		5	23	0.642857		0.414021
mef2-G4;FB-G4/UAS-GlyP-RNAi	16 h	19	10	0.310345		25	20	-0.111111		0.0996169		mef2-G4;FB-G4/UAS-GlyS-RNAi	16 h	28	13	0.365854		6	12	0.333333		0.349593
mef2-G4;FB-G4/UAS-GlyP-RNAi	16 h	35	15	0.4		12	9	-0.142857		0.128571		mef2-G4;FB-G4/UAS-GlyS-RNAi	16 h	23	9	0.4375		10	21	0.354839		0.396169
mef2-G4;FB-G4/UAS-GlyP-RNAi	16 h	16	10	0.230769		11	18	0.241379		0.236074		mef2-G4;FB-G4/UAS-GlyS-RNAi	16 h	25	7	0.5625		3	12	0.6		0.58125
mef2-G4;FB-G4/UAS-GlyP-RNAi	16 h	14	6	0.4		18	19	0.027027		0.213514		mef2-G4;FB-G4/UAS-GlyS-RNAi	16 h	24	15	0.230769		5	37	0.761905		0.496337
mef2-G4;FB-G4/UAS-GlyP-RNAi	16 h	10	8	0.111111		12	12	0		0.0555556		mef2-G4;FB-G4/UAS-GlyS-RNAi	16 h	11	7	0.222222		4	13	0.529412		0.375817
mef2-G4;FB-G4/UAS-GlyP-RNAi	16 h	24	19	0.116279		12	18	0.2		0.15814		mef2-G4;FB-G4/UAS-GlyS-RNAi	16 h	17	8	0.36		4	21	0.68		0.52
mef2-G4;FB-G4/UAS-GlyP-RNAi	16 h	19	15	0.117647		13	11	-0.0833333		0.0171569		mef2-G4;FB-G4/UAS-GlyS-RNAi	16 h	30	6	0.666667		6	18	0.5		0.583333
mef2-G4;FB-G4/UAS-GlyP-RNAi	16 h	15	14	0.0344828		12	13	0.04		0.0372414		mef2-G4;FB-G4/UAS-GlyS-RNAi	16 h	24	8	0.5		5	15	0.5		0.5
mef2-G4;FB-G4/UAS-GlyP-RNAi	16 h	13	17	-0.133333		15	17	0.0625		-0.0354167		mef2-G4;FB-G4/UAS-GlyS-RNAi	16 h	21	7	0.5		4	19	0.652174		0.576087

## Sheet: Figure 5 sensory acuity
Genotype	3-Oct [1:100]	MCH [1:80]	Balance	Sucrose preference 2 M	N
w1118; mef-G4	-0.46 ± 0.07*	-0.40 ± 0.13*	0.06 ± 0.05	0.28 ± 0.06*	6 - 8
w1118, UAS-GlyPRNAI	-0.43 ± 0.04*	-0.33 ± 0.08*	-0.10 ± 0.06	0.46 ± 0.06*	8 - 17
w1118; mef-G4; UAS-GlyPRNAI	-0.25 ± 0.06*	-0.28 ± 0.06*	-0.01 ± 0.05*	0.27 ± 0.07*	8 - 9
w1118, UAS-GlySRNAI	-0.37 ± 0.07*	-0.47 ± 0.04*	-0.15 ± 0.10	0.27 ± 0.06*	6 - 10
w1118; mef-G4; UAS-GlySRNAI	-0.19 ± 0.04*	-0.15 ± 0.04*	-0.09 ± 0.08	0.25 ± 0.07*	8
P* < 0.05
Genotype	3-Oct [1:100]	MCH [1:80]	Balance	Sucrose preference 2 M	N
w1118; FB-G4	-0.35 ± 0.06 *	-0.39 ± 0.05*	0.05 ± 0.14	0.20 ± 0.06*	6 - 9
w1118, UAS-GlyPRNAI	-0.43 ± 0.04*	-0.33 ± 0.08*	-0.10 ± 0.06	0.46 ± 0.06*	8 - 17
w1118; FB; UAS-GlyPRNAI	-0.75 ± 0.07*	-0.43 ± 0.09*	0.03 ± 0.09	0.22 ± 0.05*	6 - 8
w1118, UAS-GlySRNAI	-0.37 ± 0.07*	-0.47 ± 0.04*	-0.15 ± 0.10	0.27 ± 0.06*	6 - 10
w1118; FB; UAS-GlySRNAI	-0.22 ± 0.09*	-0.48 ± 0.12*	-0.18 ± 0.18	0.25 ± 0.06*	6 - 8
P* < 0.05
Genotype	3-Oct [1:100]	MCH [1:80]	Balance	Sucrose preference 2 M	N
w1118; mef2-G4;FB-G4	-0.39 ± 0.05 *	-0.43 ± 0.09*	0.06 ± 0.08	0.19 ± 0.09*	7- 18
w1118, UAS-GlyPRNAI	-0.43 ± 0.04*	-0.33 ± 0.08*	-0.10 ± 0.06	0.46 ± 0.06*	8 - 17
w1118; mef2-G4; FB-G4; UAS-GlyPRNAI	-0.52 ± 0.06*	-0.39 ± 0.06*	0.03 ± 0.05	0.31 ± 0.06*	6 - 10
w1118, UAS-GlySRNAI	-0.37 ± 0.07*	-0.47 ± 0.04*	-0.15 ± 0.10	0.27 ± 0.06*	6 - 10
w1118; mef2-G4; FB; UAS-GlySRNAI	-0.71 ± 0.09*	-0.73 ± 0.05*	-0.07 ± 0.08	0.22 ± 0.05*	6 - 13
P* < 0.05

## Sheet: Figure 5- figure suppl.3
Figure S3
Glycogen whole body											Glycogen Thorax					Abdomen
Genotype	Starvation	per mg fly (µg/mg)	Normalized			Genotype	Starvation	per mg fly (µg/mg)	Normalized		Genotype	Starvation	per mg fly (µg/mg)	Normalized		Genotype	Starvation	per mg fly (µg/mg)	Normalized
mef2-Gal4/+	16 h	1.53704	1.03019			mef2-Gal4/+	16 h	2.69305	1		mef2-Gal4/+	16 h	0.384547	1.06641		FB-Gal4/+	16 h	0.324284	1.01023
mef2-Gal4/+	16 h	1.74286	1.16814			mef2-Gal4/+	16 h	3.15599	1.0152		mef2-Gal4/+	16 h	0.373295	1.03521		FB-Gal4/+	16 h	0.320844	0.999515
mef2-Gal4/+	16 h	1.83842	1.23218			mef2-Gal4/+	16 h	3.07145	1.12543		mef2-Gal4/+	16 h	0.372045	1.03174		FB-Gal4/+	16 h	0.332636	1.03625
Mean		1.7061	1.1435			Mean		2.9735	1.04688		Mean		0.376629	1.04445		Mean		0.325921	1.01533
STDEV		0.125753	0.0842846			STDEV		0.201284	0.0558894		STDEV		0.00562183	0.0155902		STDEV		0.00495146	0.0154251
SEM		0.0726033	0.0486618			SEM		0.116211	0.0322678		SEM		0.00324576	0.009001		SEM		0.00285872	0.00890568
Genotype	Starvation	per mg fly (µg/mg)	Normalized			Genotype	Starvation	per mg fly (µg/mg)			Genotype	Starvation	per mg fly (µg/mg)	Normalized		Genotype	Starvation	per mg fly (µg/mg)	Normalized
UAS-GlyP-RNAi	16 h	1.62128	1.08665			UAS-GlyS-RNAi	16 h	3.40709	1.27174		UAS-GlyP-RNAi	16 h	0.363807	1.00889		UAS-GlyS-RNAi	16 h	0.33423	1.04121
UAS-GlyP-RNAi	16 h	1.49208	1.00005			UAS-GlyS-RNAi	16 h	3.55669	1.13504		UAS-GlyP-RNAi	16 h	0.364446	1.01067		UAS-GlyS-RNAi	16 h	0.32546	1.01389
UAS-GlyP-RNAi	16 h	1.62497	1.08912			UAS-GlyS-RNAi	16 h	3.62425	1.27174		UAS-GlyP-RNAi	16 h	0.360611	1.00003		UAS-GlyS-RNAi	16 h	0.338128	1.05336
Mean		1.57944	1.05861			Mean		3.52934	1.22617		Mean		0.362954	1.00653		Mean		0.332606	1.03616
STDEV		0.061794	0.0414169			STDEV		0.0907418	0.0644397		STDEV		0.00167757	0.00465216		STDEV		0.0052975	0.0165031
SEM		0.0356768	0.023912			SEM		0.0523898	0.0372043		SEM		0.000968545	0.00268593		SEM		0.00305851	0.00952808
Genotype	Starvation	per mg fly (µg/mg)	Normalized			Genotype	Starvation	per mg fly (µg/mg)			Genotype	Starvation	per mg fly (µg/mg)	Normalized		Genotype	Starvation	per mg fly (µg/mg)	Normalized
mef2-Gal4/UAS-GlyP-RNAi	16 h	1.65137	1.10681			mef2-Gal4/UAS-GlyS-RNAi	16 h	3.01879	1.0198		mef2-Gal4/UAS-GlyP-RNAi	16 h	0.54076	1.49961		FB-Gal4/UAS-GlyS-RNAi	16 h	0.304927	0.94993
mef2-Gal4/UAS-GlyP-RNAi	16 h	1.52037	1.01901			mef2-Gal4/UAS-GlyS-RNAi	16 h	3.33633	0.999809		mef2-Gal4/UAS-GlyP-RNAi	16 h	0.544527	1.51006		FB-Gal4/UAS-GlyS-RNAi	16 h	0.291355	0.907648
mef2-Gal4/UAS-GlyP-RNAi	16 h	1.51288	1.01399			mef2-Gal4/UAS-GlyS-RNAi	16 h	3.37867	1.04378		mef2-Gal4/UAS-GlyP-RNAi	16 h	0.543586	1.50745		FB-Gal4/UAS-GlyS-RNAi	16 h	0.295879	0.921742
Mean		1.56154	1.04661			Mean		3.2446	1.02113		Mean		0.542958	1.50571		Mean		0.297387	0.92644
STDEV		0.0635926	0.0426224			STDEV		0.160604	0.017977		STDEV		0.00160069	0.00443896		STDEV		0.0056426	0.0175782
SEM		0.0367152	0.024608			SEM		0.0927248	0.010379		SEM		0.000924158	0.00256283		SEM		0.00325776	0.0101488
											Glycogen Thorax
Genotype	Starvation	per mg fly (µg/mg)	Normalized			Genotype	Starvation	per mg fly (µg/mg)	Normalized		Genotype	Starvation	per mg fly (µg/mg)	Normalized
FB-Gal4/+	16 h	1.99485	1.07504			FB-Gal4/+	16 h	1.89248	1.16453		mef2-Gal4/+	16 h	0.264233	1.00088
FB-Gal4/+	16 h	1.89248	1.01988			FB-Gal4/+	16 h	1.53626	0.945327		mef2-Gal4/+	16 h	0.275865	1.04494
FB-Gal4/+	16 h	1.85563	1.00002			FB-Gal4/+	16 h	1.97847	1.21744		mef2-Gal4/+	16 h	0.27676	1.04833
Mean		1.91432	1.03165			FB-Gal4/+	16 h	1.89273	1.16467		Mean		0.272286	1.03139
STDEV		0.058894	0.0317385			FB-Gal4/+	16 h	1.63587	1.00662		STDEV		0.00570614	0.0216142
SEM		0.0340025	0.0183242			FB-Gal4/+	16 h	1.82956	1.12581		SEM		0.00329444	0.012479
						Mean		1.79423	1.10407
Genotype	Starvation	per mg fly (µg/mg)	Normalized			STDEV		0.156084	0.0960451		Genotype	Starvation	per mg fly (µg/mg)
UAS-GlyP-RNAi	16 h	2.06764	1.11427			SEM		0.063721	0.0392103		UAS-GlyS-RNAi	16 h	0.308072	1.16694
UAS-GlyP-RNAi	16 h	2.16444	1.16644								UAS-GlyS-RNAi	16 h	0.310286	1.17532
UAS-GlyP-RNAi	16 h	2.1596	1.16383			Genotype	Starvation	per mg fly (µg/mg)	Normalized		UAS-GlyS-RNAi	16 h	0.329104	1.24661
Mean		2.13056	1.14818			UAS-GlyS-RNAi	16 h	2.1354	1.314		Mean		0.31582	1.19629
STDEV		0.0445349	0.0240003			UAS-GlyS-RNAi	16 h	2.12572	1.30805		STDEV		0.0094364	0.0357439
SEM		0.0257122	0.0138566			UAS-GlyS-RNAi	16 h	2.2564	1.38846		SEM		0.00544811	0.0206368
						UAS-GlyS-RNAi	16 h	1.79932	1.1072
Genotype	Starvation	per mg fly (µg/mg)	Normalized			UAS-GlyS-RNAi	16 h	1.63009	1.00306		Genotype	Starvation	per mg fly (µg/mg)
FB-Gal4/UAS-GlyP-RNAi	16 h	2.39577	1.2911			UAS-GlyS-RNAi	16 h	1.62511	1		mef2-Gal4/UAS-GlyS-RNAi	16 h	0.232717	0.881504
FB-Gal4/UAS-GlyP-RNAi	16 h	2.43312	1.31123			Mean		1.92867	1.1868		mef2-Gal4/UAS-GlyS-RNAi	16 h	0.223807	0.847753
FB-Gal4/UAS-GlyP-RNAi	16 h	2.54516	1.37161			STDEV		0.253971	0.156279		mef2-Gal4/UAS-GlyS-RNAi	16 h	0.230287	0.872299
Mean		2.45801	1.32465			SEM		0.103683	0.0638008		Mean		0.228937	0.867185
STDEV		0.0634767	0.0342082								STDEV		0.00376073	0.0142452
SEM		0.0366483	0.0197501			Genotype	Starvation	per mg fly (µg/mg)	Normalized		SEM		0.00217126	0.00822446
						FB-Gal4/UAS-GlyS-RNAi	16 h	1.80757	1.11227
						FB-Gal4/UAS-GlyS-RNAi	16 h	2.39577	1.47422
						FB-Gal4/UAS-GlyS-RNAi	16 h	3.2314	1.98842
						FB-Gal4/UAS-GlyS-RNAi	16 h	1.90352	1.17132													FB,Mef2-Gal4	GlyS-RNAi	FB, Mef2-GlyS
						FB-Gal4/UAS-GlyS-RNAi	16 h	1.70189	1.04724													1.15506	1.32876	1.00867
						FB-Gal4/UAS-GlyS-RNAi	16 h	1.71629	1.0561													0.0441654	0.0318798	0.0114389
						Mean		2.12607	1.30826													0.0254989	0.0247933	0.00216175
						STDEV		0.546704	0.33641
						SEM		0.223191	0.137339
						Genotype	Starvation	per mg fly (µg/mg)	Normalized
						FB-Gal4;mef2-Gal4/+	16 h	0.848308	1.15212
						FB-Gal4;mef2-Gal4/+	16 h	0.819089	1.11244
						FB-Gal4;mef2-Gal4/+	16 h	0.884019	1.20062
						Mean		0.850472	1.15506
						STDEV		0.0265516	0.0360609
						SEM		0.0153296	0.0208198
						Genotype	Starvation	per mg fly (µg/mg)	Normalized
						UAS-GlyS-RNAi	16 h	0.961326	1.30562
						UAS-GlyS-RNAi	16 h	0.968628	1.31553
						UAS-GlyS-RNAi	16 h	1.00514	1.36512
						Mean		0.978364	1.32876
						STDEV		0.0191657	0.0260297
						SEM		0.0110653	0.0150283
						Genotype	Starvation	per mg fly (µg/mg)	Normalized
						FB-Gal4;mef2-Gal4/UAS-GlyS-RNAi	16 h	0.752236	1.02164
						FB-Gal4;mef2-Gal4/UAS-GlyS-RNAi	16 h	0.736319	1.00003
						FB-Gal4;mef2-Gal4/UAS-GlyS-RNAi	16 h	0.739503	1.00435
						Mean		0.742686	1.00867
						STDEV		0.00687692	0.00933983
						SEM		0.00397039	0.00539236

## Sheet: Figure 5- Figure suppl. 4
Figure S4A
	Training	Test
	STM	2 min
3-Oct[1:80] MCH[1:100] 2M sucrose
	2M sucrose				2M sucrose				2M sucrose	2M sucrose
	reinforced				reinforced				reinforced	reinforced
Genotype	3OCT	MCH	AI		MCH	3-Oct	AI		3OCT	MCH	LI
w1118; MB247-G80; Mef2-G4/+	23	8	0.483871		18	13	0.16129		0.483871	0.16129	0.322581
w1118; MB247-G80; Mef2-G4/+	25	12	0.351351		34	24	0.172414		0.351351	0.172414	0.261883
w1118; MB247-G80; Mef2-G4/+	24	16	0.2		26	21	0.106383		0.2	0.106383	0.153191
w1118; MB247-G80; Mef2-G4/+	19	9	0.357143		28	17	0.244444		0.357143	0.244444	0.300794
w1118; MB247-G80; Mef2-G4/+	19	10	0.310345		34	18	0.307692		0.310345	0.307692	0.309019
w1118; MB247-G80; Mef2-G4/+	15	10	0.2		18	16	0.0588235		0.2	0.0588235	0.129412
w1118; MB247-G80; Mef2-G4/+	34	12	0.478261		13	11	0.0833333		0.478261	0.0833333	0.280797
w1118; MB247-G80; Mef2-G4/+	25	15	0.25		18	12	0.2		0.25	0.2	0.225
w1118; MB247-G80; Mef2-G4/+	43	18	0.409836		38	25	0.206349		0.409836	0.206349	0.308093
w1118; MB247-G80; Mef2-G4/+	22	9	0.419355		18	11	0.241379		0.419355	0.241379	0.330367
										Mean	0.262114
										STDEV	0.0709659
										SEM	0.0224414
	2M sucrose				2M sucrose				2M sucrose	2M sucrose
	reinforced				reinforced				reinforced	reinforced
Genotype	3OCT	MCH	AI		MCH	3-Oct	AI		3OCT	MCH	LI
UAS-GlyS-RNAi	34	21	0.236364		21	16	0.135135		0.236364	0.135135	0.185749
UAS-GlyS-RNAi	31	13	0.409091		34	16	0.36		0.409091	0.36	0.384545
UAS-GlyS-RNAi	27	14	0.317073		31	19	0.24		0.317073	0.24	0.278537
UAS-GlyS-RNAi	44	20	0.375		30	21	0.176471		0.375	0.176471	0.275735
UAS-GlyS-RNAi	29	18	0.234043		55	28	0.325301		0.234043	0.325301	0.279672
UAS-GlyS-RNAi	37	22	0.254237		48	21	0.391304		0.254237	0.391304	0.322771
UAS-GlyS-RNAi	32	11	0.488372		28	21	0.142857		0.488372	0.142857	0.315615
UAS-GlyS-RNAi	32	13	0.422222		41	20	0.344262		0.422222	0.344262	0.383242
UAS-GlyS-RNAi	26	15	0.268293		19	11	0.266667		0.268293	0.266667	0.26748
UAS-GlyS-RNAi	19	6	0.52		54	34	0.227273		0.52	0.227273	0.373636
										Mean	0.306698
										STDEV	0.0627045
										SEM	0.0198289
	2M sucrose				2M sucrose				2M sucrose	2M sucrose
	reinforced				reinforced				reinforced	reinforced
Genotype	3OCT	MCH	AI		MCH	3-Oct	AI		3OCT	MCH	LI
w1118; MB247-G80; Mef2-G4/UAS-GlyS-RNAi	32	10	0.52381		20	4	0.666667		0.52381	0.666667	0.595238
w1118; MB247-G80; Mef2-G4/UAS-GlyS-RNAi	25	12	0.351351		17	8	0.36		0.351351	0.36	0.355676
w1118; MB247-G80; Mef2-G4/UAS-GlyS-RNAi	30	12	0.428571		30	13	0.395349		0.428571	0.395349	0.41196
w1118; MB247-G80; Mef2-G4/UAS-GlyS-RNAi	19	13	0.1875		39	14	0.471698		0.1875	0.471698	0.329599
w1118; MB247-G80; Mef2-G4/UAS-GlyS-RNAi	30	9	0.538462		17	11	0.214286		0.538462	0.214286	0.376374
w1118; MB247-G80; Mef2-G4/UAS-GlyS-RNAi	43	14	0.508772		27	6	0.636364		0.508772	0.636364	0.572568
w1118; MB247-G80; Mef2-G4/UAS-GlyS-RNAi	40	12	0.538462		30	22	0.153846		0.538462	0.153846	0.346154
w1118; MB247-G80; Mef2-G4/UAS-GlyS-RNAi	29	10	0.487179		31	18	0.265306		0.487179	0.265306	0.376243
w1118; MB247-G80; Mef2-G4/UAS-GlyS-RNAi	12	7	0.263158		35	12	0.489362		0.263158	0.489362	0.37626
w1118; MB247-G80; Mef2-G4/UAS-GlyS-RNAi	22	13	0.257143		40	25	0.230769		0.257143	0.230769	0.243956
										Mean	0.398403
										STDEV	0.10743
										SEM	0.0339724
Figure S4B
	Training	Test
	STM	2 min
3-Oct[1:80] MCH[1:100] 2M sucrose
	2M sucrose				2M sucrose				2M sucrose	2M sucrose
	reinforced				reinforced				reinforced	reinforced
Genotype	3OCT	MCH	AI		MCH	3-Oct	AI		3OCT	MCH	LI
w1118; MB247-G4/+	37	16	0.396226		40	25	0.230769		0.396226	0.230769	0.313498
w1118; MB247-G4/+	26	29	-0.0545455		46	17	0.460317		-0.0545455	0.460317	0.202886
w1118; MB247-G4/+	38	36	0.027027		46	22	0.352941		0.027027	0.352941	0.189984
w1118; MB247-G4/+	35	33	0.0294118		33	24	0.157895		0.0294118	0.157895	0.0936533
w1118; MB247-G4/+	45	20	0.384615		34	17	0.333333		0.384615	0.333333	0.358974
w1118; MB247-G4/+	23	28	-0.0980392		43	29	0.194444		-0.0980392	0.194444	0.0482026
w1118; MB247-G4/+	21	13	0.235294		33	24	0.157895		0.235294	0.157895	0.196594
w1118; MB247-G4/+	22	21	0.0232558		54	38	0.173913		0.0232558	0.173913	0.0985844
w1118; MB247-G4/+	18	13	0.16129		35	23	0.206897		0.16129	0.206897	0.184093
w1118; MB247-G4/+	26	30	-0.0714286		28	23	0.0980392		-0.0714286	0.0980392	0.0133053
w1118; MB247-G4/+	36	24	0.2		35	20	0.272727		0.2	0.272727	0.236364
w1118; MB247-G4/+	33	26	0.118644		44	28	0.222222		0.118644	0.222222	0.170433
w1118; MB247-G4/+	28	23	0.0980392		53	50	0.0291262		0.0980392	0.0291262	0.0635827
w1118; MB247-G4/+	36	32	0.0588235		47	25	0.305556		0.0588235	0.305556	0.18219
										Mean	0.168025
										STDEV	0.0979911
										SEM	0.0261892
	2M sucrose				2M sucrose				2M sucrose	2M sucrose
	reinforced				reinforced				reinforced	reinforced
Genotype	3OCT	MCH	AI		MCH	3-Oct	AI		3OCT	MCH	LI
UAS-GlyS-RNAi	20	17	0.0810811		20	15	0.142857		0.0810811	0.142857	0.111969
UAS-GlyS-RNAi	17	10	0.259259		24	10	0.411765		0.259259	0.411765	0.335512
UAS-GlyS-RNAi	24	29	-0.0943396		19	14	0.151515		-0.0943396	0.151515	0.0285878
UAS-GlyS-RNAi	32	24	0.142857		26	14	0.3		0.142857	0.3	0.221429
UAS-GlyS-RNAi	25	27	-0.0384615		21	20	0.0243902		-0.0384615	0.0243902	-0.00703565
UAS-GlyS-RNAi	31	12	0.44186		22	17	0.128205		0.44186	0.128205	0.285033
UAS-GlyS-RNAi	18	19	-0.027027		14	6	0.4		-0.027027	0.4	0.186486
UAS-GlyS-RNAi	27	17	0.227273		14	6	0.4		0.227273	0.4	0.313636
UAS-GlyS-RNAi	23	23	0		19	17	0.0555556		0	0.0555556	0.0277778
UAS-GlyS-RNAi	33	10	0.534884		29	17	0.26087		0.534884	0.26087	0.397877
UAS-GlyS-RNAi	29	23	0.115385		19	25	-0.136364		0.115385	-0.136364	-0.0104895
UAS-GlyS-RNAi	24	13	0.297297		35	20	0.272727		0.297297	0.272727	0.285012
UAS-GlyS-RNAi	40	21	0.311475		22	24	-0.0434783		0.311475	-0.0434783	0.133999
UAS-GlyS-RNAi	13	16	-0.103448		27	12	0.384615		-0.103448	0.384615	0.140584
										Mean	0.175027
										STDEV	0.13549
										SEM	0.0362113
	2M sucrose				2M sucrose				2M sucrose	2M sucrose
	reinforced				reinforced				reinforced	reinforced
Genotype	3OCT	MCH	AI		MCH	3-Oct	AI		3OCT	MCH	LI
w1118; MB247-G4/UAS-GlyS-RNAi	14	10	0.166667		16	11	0.185185		0.166667	0.185185	0.175926
w1118; MB247-G4/UAS-GlyS-RNAi	28	28	0		18	11	0.241379		0	0.241379	0.12069
w1118; MB247-G4/UAS-GlyS-RNAi	21	21	0		41	14	0.490909		0	0.490909	0.245455
w1118; MB247-G4/UAS-GlyS-RNAi	38	31	0.101449		17	5	0.545455		0.101449	0.545455	0.323452
w1118; MB247-G4/UAS-GlyS-RNAi	18	9	0.333333		36	7	0.674419		0.333333	0.674419	0.503876
w1118; MB247-G4/UAS-GlyS-RNAi	24	15	0.230769		31	25	0.107143		0.230769	0.107143	0.168956
w1118; MB247-G4/UAS-GlyS-RNAi	7	10	-0.176471		41	15	0.464286		-0.176471	0.464286	0.143908
w1118; MB247-G4/UAS-GlyS-RNAi	13	17	-0.133333		22	6	0.571429		-0.133333	0.571429	0.219048
w1118; MB247-G4/UAS-GlyS-RNAi	27	19	0.173913		25	13	0.315789		0.173913	0.315789	0.244851
w1118; MB247-G4/UAS-GlyS-RNAi	45	41	0.0465116		20	11	0.290323		0.0465116	0.290323	0.168417
w1118; MB247-G4/UAS-GlyS-RNAi	19	20	-0.025641		28	18	0.217391		-0.025641	0.217391	0.0958751
w1118; MB247-G4/UAS-GlyS-RNAi	36	19	0.309091		17	9	0.307692		0.309091	0.307692	0.308392
w1118; MB247-G4/UAS-GlyS-RNAi	22	17	0.128205		26	16	0.238095		0.128205	0.238095	0.18315
w1118; MB247-G4/UAS-GlyS-RNAi	41	27	0.205882		35	20	0.272727		0.205882	0.272727	0.239305
										Mean	0.224379
										STDEV	0.103811
										SEM	0.0277447

## Sheet: sensory acuity Figure suppl.4
Sensory perception
Genotype	3-Oct	MCH	Balance	Sucrose preference	N
mef2-G4; mb247-G80	- 0.61 ± 0.07*	- 0.61 ± 0.08*	0.1 ± 0.06	0.3± 0.1*	8 - 11
UAS-GlyS RNAi/+	- 0.53 ± 0.07*	- 0.52 ± 0.07*	0.05 ± 0.07	0.22 ± 0.05*	8 - 11
mef2-G4; mb247-G80; UAS-GlyS RNAi	- 0.48 ± 0.07*	- 0.45 ± 0.07*	0.1 ± 0.05	0.32 ± 0.08*	8 - 11
	3-Oct	MCH	Balance	Sucrose preference	N
mb247-G4/+	- 0.31 ± 0.08*	- 0.18 ± 0.03*	- 0.13 ± 0.4	0.15± 0.03*	8 - 10
UAS-GlyS RNAi/+	- 0.37 ± 0.08*	- 0.29 ± 0.05*	0.11 ± 0.16	0.29 ± 0.05*	8 - 10
mb247;UAS-GlyS RNAi	- 0.48 ± 0.1*	- 0.57 ± 0.0*	- 0.09 ± 0.24	0.28 ± 0.07*	8 - 10
	P* < 0.05
