# Supplementary material for: Octopamine integrates the status of internal energy supply into the formation of food-related memories
Source: eLife. 2024 Apr 24;12:RP88247. doi: 10.7554/eLife.88247 (PMC11042807; doi:10.7554/eLife.88247)
Supplement: Figure 6—source data 1. [file elife-88247-fig6-data1.xlsx]

## Sheet: Figure 6
Figure 6A
	Training	Test
	STM	2 min
		2 M Sucrose					2 M Sucrose								2 M Sucrose					2 M Sucrose								2 M Sucrose					2 M Sucrose								2 M Sucrose					2 M Sucrose
		Reinforced					Reinforced								Reinforced					Reinforced								Reinforced					Reinforced								Reinforced					Reinforced
Genotype	Starvation	3OCT	MCH	AI		3OCT	MCH	AI		LI			Genotype	Starvation	3OCT	MCH	AI		3OCT	MCH	AI		LI			Genotype	Starvation	3OCT	MCH	AI		3OCT	MCH	AI		LI			Genotype	Starvation	3OCT	MCH	AI		3OCT	MCH	AI		LI
mef2-Gal4/+	16 h	26	24	0.04		3	18	0.714286		0.377143			Tßh;;mef2-Gal4/+	16 h	17	17	0		7	5	-0.166667		-0.0833333			Tßh;;GlyS-RNAi/+	16 h	7	14	-0.333333		5	15	0.5		0.0833333			Tßh;;GlyS-RNAi/mef2-Gal4	16 h	4	11	-0.466667		3	1	-0.5		-0.483333
mef2-Gal4/+	16 h	19	13	0.1875		8	18	0.384615		0.286058			Tßh;;mef2-Gal4/+	16 h	10	1	0.818182		17	12	-0.172414		0.322884			Tßh;;GlyS-RNAi/+	16 h	18	18	0		9	21	0.4		0.2			Tßh;;GlyS-RNAi/mef2-Gal4	16 h	6	9	-0.2		4	5	0.111111		-0.0444444
mef2-Gal4/+	16 h	13	0	1		11	27	0.421053		0.710526			Tßh;;mef2-Gal4/+	16 h	17	6	0.478261		24	13	-0.297297		0.0904818			Tßh;;GlyS-RNAi/+	16 h	9	18	-0.333333		16	25	0.219512		-0.0569106			Tßh;;GlyS-RNAi/mef2-Gal4	16 h	5	7	-0.166667		15	15	0		-0.0833333
mef2-Gal4/+	16 h	17	11	0.214286		10	29	0.487179		0.350733			Tßh;;mef2-Gal4/+	16 h	10	14	-0.166667		4	23	0.703704		0.268519			Tßh;;GlyS-RNAi/+	16 h	12	21	-0.272727		4	12	0.5		0.113636			Tßh;;GlyS-RNAi/mef2-Gal4	16 h	7	22	-0.517241		14	17	0.0967742		-0.210234
mef2-Gal4/+	16 h	39	8	0.659574		19	28	0.191489		0.425532			Tßh;;mef2-Gal4/+	16 h	7	6	0.0769231		12	12	0		0.0384615			Tßh;;GlyS-RNAi/+	16 h	23	21	0.0454545		21	19	-0.05		-0.00227273			Tßh;;GlyS-RNAi/mef2-Gal4	16 h	8	12	-0.2		16	14	-0.0666667		-0.133333
mef2-Gal4/+	16 h	11	13	-0.0833333		1	6	0.714286		0.315476			Tßh;;mef2-Gal4/+	16 h	18	9	0.333333		7	11	0.222222		0.277778			Tßh;;GlyS-RNAi/+	16 h	8	23	-0.483871		22	19	-0.0731707		-0.278521			Tßh;;GlyS-RNAi/mef2-Gal4	16 h	17	17	0		22	33	0.2		0.1
mef2-Gal4/+	16 h	21	4	0.68		3	17	0.7		0.69			Tßh;;mef2-Gal4/+	16 h	9	11	-0.1		12	9	-0.142857		-0.121429			Tßh;;GlyS-RNAi/+	16 h	24	11	0.371429		14	10	-0.166667		0.102381			Tßh;;GlyS-RNAi/mef2-Gal4	16 h	8	1	0.777778		13	6	-0.368421		0.204678
mef2-Gal4/+	16 h	32	14	0.391304		12	39	0.529412		0.460358			Tßh;;mef2-Gal4/+	16 h	12	9	0.142857		23	14	-0.243243		-0.0501931
mef2-Gal4/+	16 h	18	10	0.285714		3	30	0.818182		0.551948			Tßh;;mef2-Gal4/+	16 h	12	5	0.411765		10	10	0		0.205882
		2 M Sucrose					2 M Sucrose								2 M Sucrose					2 M Sucrose								2 M Sucrose													2 M Sucrose					2 M Sucrose
		Reinforced					Reinforced								Reinforced					Reinforced								Reinforced					Reinforced								Reinforced					Reinforced
Genotype	Starvation	3OCT	MCH	AI		3OCT	MCH	AI		LI			Genotype	Starvation	3OCT	MCH	AI		3OCT	MCH	AI		LI			Genotype	Starvation	3OCT	MCH	AI		3OCT	MCH	AI		LI			Genotype	Starvation	3OCT	MCH	AI		3OCT	MCH	AI		LI
FB-Gal4/+	16 h	16	11	0.185185		3	12	0.6		0.392593			Tßh;FB-Gal4/+	16 h	1	5	-0.666667		4	10	0.428571		-0.119048			Tßh;;GlyS-RNAi/+	16 h	3	14	-0.647059		9	23	0.4375		-0.104779			Tßh;FB-Gal4;GlyS-RNAi	16 h	3	7	-0.4		10	40	0.6		0.1
FB-Gal4/+	16 h	10	10	0		2	20	0.818182		0.409091			Tßh;FB-Gal4/+	16 h	5	1	0.666667		17	12	-0.172414		0.247126			Tßh;;GlyS-RNAi/+	16 h	1	20	-0.904762		6	35	0.707317		-0.0987224			Tßh;FB-Gal4;GlyS-RNAi	16 h	5	15	-0.5		12	20	0.25		-0.125
FB-Gal4/+	16 h	27	20	0.148936		15	32	0.361702		0.255319			Tßh;FB-Gal4/+	16 h	0	11	-1		11	24	0.371429		-0.314286			Tßh;;GlyS-RNAi/+	16 h	1	9	-0.8		3	7	0.4		-0.2			Tßh;FB-Gal4;GlyS-RNAi	16 h	24	12	0.333333		12	6	-0.333333		0
FB-Gal4/+	16 h	15	4	0.578947		7	10	0.176471		0.377709			Tßh;FB-Gal4/+	16 h	25	17	0.190476		28	14	-0.333333		-0.0714286			Tßh;;GlyS-RNAi/+	16 h	3	24	-0.777778		5	6	0.0909091		-0.343434			Tßh;FB-Gal4;GlyS-RNAi	16 h	24	24	0		10	8	-0.111111		-0.0555556
FB-Gal4/+	16 h	14	10	0.166667		23	22	-0.0222222		0.0722222			Tßh;FB-Gal4/+	16 h	8	22	-0.466667		10	25	0.428571		-0.0190476			Tßh;;GlyS-RNAi/+	16 h	14	10	0.166667		12	18	0.2		0.183333			Tßh;FB-Gal4;GlyS-RNAi	16 h	10	7	0.176471		18	18	0		0.0882353
FB-Gal4/+	16 h	12	5	0.411765		3	12	0.6		0.505882			Tßh;FB-Gal4/+	16 h	5	15	-0.5		20	17	-0.0810811		-0.290541			Tßh;;GlyS-RNAi/+	16 h	16	16	0		10	28	0.473684		0.236842			Tßh;FB-Gal4;GlyS-RNAi	16 h	12	10	0.0909091		10	19	0.310345		0.200627
FB-Gal4/+	16 h	11	6	0.294118		6	14	0.4		0.347059			Tßh;FB-Gal4/+	16 h	27	12	0.384615		6	15	0.428571		0.406593			Tßh;;GlyS-RNAi/+	16 h	4	5	-0.111111		2	9	0.636364		0.262626			Tßh;FB-Gal4;GlyS-RNAi	16 h	15	17	-0.0625		25	24	-0.0204082		-0.0414541
FB-Gal4/+	16 h	14	6	0.4		4	18	0.636364		0.518182			Tßh;FB-Gal4/+	16 h	14	28	-0.333333		27	27	0		-0.166667			Tßh;;GlyS-RNAi/+	16 h	10	26	-0.444444		15	12	-0.111111		-0.277778			Tßh;FB-Gal4;GlyS-RNAi	16 h	0	12	-1		12	6	-0.333333		-0.666667
FB-Gal4/+	16 h	28	15	0.302326		14	38	0.461538		0.381932			Tßh;FB-Gal4/+	16 h	19	13	0.1875		15	4	-0.578947		-0.195724
FB-Gal4/+	16 h	26	20	0.130435		17	22	0.128205		0.12932
		2 M Sucrose					2 M Sucrose								2 M Sucrose					2 M Sucrose								2 M Sucrose					2 M Sucrose								2 M Sucrose					2 M Sucrose
		Reinforced					Reinforced								Reinforced					Reinforced								Reinforced					Reinforced								Reinforced					Reinforced
Genotype	Starvation	3OCT	MCH	AI		3OCT	MCH	AI		LI			Genotype	Starvation	3OCT	MCH	AI		3OCT	MCH	AI		LI			Genotype	Starvation	3OCT	MCH	AI		3OCT	MCH	AI		LI			Genotype	Starvation	3OCT	MCH	AI		3OCT	MCH	AI		LI
FB-Gal;mef2-Gal4/+	16 h	13	13	0		14	15	0.0344828		0.0172414			Tßh;FB-Gal4;mef2-Gal4/+	16 h	15	12	0.111111		11	14	0.12		0.115556			Tßh;;GlyS-RNAi/+	16 h	9	33	-0.571429		5	21	0.615385		0.021978			Tßh;FB-Gal4;mef2Gal4/GlyS-RNAi	16 h	40	10	0.6		16	16	0		0.3
FB-Gal;mef2-Gal4/+	16 h	11	11	0		19	30	0.22449		0.112245			Tßh;FB-Gal4;mef2-Gal4/+	16 h	33	16	0.346939		19	18	-0.027027		0.159956			Tßh;;GlyS-RNAi/+	16 h	4	31	-0.771429		3	39	0.857143		0.0428571			Tßh;FB-Gal4;mef2Gal4/GlyS-RNAi	16 h	32	21	0.207547		11	14	0.12		0.163774
FB-Gal;mef2-Gal4/+	16 h	12	8	0.2		9	27	0.5		0.35			Tßh;FB-Gal4;mef2-Gal4/+	16 h	17	15	0.0625		21	16	-0.135135		-0.0363176			Tßh;;GlyS-RNAi/+	16 h	7	35	-0.666667		12	32	0.454545		-0.106061			Tßh;FB-Gal4;mef2Gal4/GlyS-RNAi	16 h	29	17	0.26087		16	25	0.219512		0.240191
FB-Gal;mef2-Gal4/+	16 h	21	18	0.0769231		8	18	0.384615		0.230769			Tßh;FB-Gal4;mef2-Gal4/+	16 h	11	19	-0.266667		6	36	0.714286		0.22381			Tßh;;GlyS-RNAi/+	16 h	12	14	-0.0769231		12	9	-0.142857		-0.10989			Tßh;FB-Gal4;mef2Gal4/GlyS-RNAi	16 h	14	11	0.12		6	18	0.5		0.31
FB-Gal;mef2-Gal4/+	16 h	14	4	0.555556		9	19	0.357143		0.456349			Tßh;FB-Gal4;mef2-Gal4/+	16 h	12	19	-0.225806		14	23	0.243243		0.0087184			Tßh;;GlyS-RNAi/+	16 h	10	12	-0.0909091		14	10	-0.166667		-0.128788			Tßh;FB-Gal4;mef2Gal4/GlyS-RNAi	16 h	21	7	0.5		6	23	0.586207		0.543103
FB-Gal;mef2-Gal4/+	16 h	28	7	0.6		10	13	0.130435		0.365217			Tßh;FB-Gal4;mef2-Gal4/+	16 h	8	12	-0.2		14	14	0		-0.1			Tßh;;GlyS-RNAi/+	16 h	23	8	0.483871		24	17	-0.170732		0.15657			Tßh;FB-Gal4;mef2Gal4/GlyS-RNAi	16 h	28	7	0.6		12	24	0.333333		0.466667
FB-Gal;mef2-Gal4/+	16 h	21	9	0.4		11	17	0.214286		0.307143			Tßh;FB-Gal4;mef2-Gal4/+	16 h	5	11	-0.375		1	14	0.866667		0.245833			Tßh;;GlyS-RNAi/+	16 h	13	18	-0.16129		13	17	0.133333		-0.0139785			Tßh;FB-Gal4;mef2Gal4/GlyS-RNAi	16 h	11	4	0.466667		9	13	0.181818		0.324242
FB-Gal;mef2-Gal4/+	16 h	17	8	0.36		8	19	0.407407		0.383704			Tßh;FB-Gal4;mef2-Gal4/+	16 h	6	18	-0.5		8	22	0.466667		-0.0166667			Tßh;;GlyS-RNAi/+	16 h	14	13	0.037037		22	10	-0.375		-0.168981			Tßh;FB-Gal4;mef2Gal4/GlyS-RNAi	16 h	24	6	0.6		6	11	0.294118		0.447059
FB-Gal;mef2-Gal4/+	16 h	30	5	0.714286		8	20	0.428571		0.571429			Tßh;FB-Gal4;mef2-Gal4/+	16 h	10	3	0.538462		12	15	0.111111		0.324786			Tßh;;GlyS-RNAi/+	16 h	7	10	-0.176471		1	18	0.894737		0.359133			Tßh;FB-Gal4;mef2Gal4/GlyS-RNAi	16 h	19	8	0.407407		7	10	0.176471		0.291939
FB-Gal;mef2-Gal4/+	16 h	28	10	0.473684		14	31	0.377778		0.425731			Tßh;FB-Gal4;mef2-Gal4/+	16 h	20	4	0.666667		20	30	0.2		0.433333			Tßh;;GlyS-RNAi/+	16 h	10	8	0.111111		18	5	-0.565217		-0.227053			Tßh;FB-Gal4;mef2Gal4/GlyS-RNAi	16 h	13	7	0.3		12	29	0.414634		0.357317
FB-Gal;mef2-Gal4/+	16 h	19	6	0.52		14	27	0.317073		0.418537
FB-Gal;mef2-Gal4/+	16 h	21	5	0.615385		13	26	0.333333		0.474359
Figure 6B
	Training	Test
	STM	2 min
	MALES		5% Yeast					5% Yeast								5% Yeast					5% Yeast
			Reinforced					Reinforced								Reinforced					Reinforced
Genotype	Starvation	Reinforcer	3OCT	MCH	AI		3OCT	MCH	AI		LI		Genotype	Starvation	Reinforcer	3OCT	MCH	AI		3OCT	MCH	AI		LI
w1118	16 h	5% Yeast	17	9	0.307692		8	14	0.272727		0.29021		TßhnM18	16 h	5% Yeast	26	10	0.444444		16	17	0.030303		0.237374
w1118	16 h	5% Yeast	30	16	0.304348		22	25	0.0638298		0.184089		TßhnM18	16 h	5% Yeast	9	16	-0.28		8	32	0.6		0.16
w1118	16 h	5% Yeast	13	24	-0.297297		23	33	0.178571		-0.0593629		TßhnM18	16 h	5% Yeast	18	11	0.241379		9	10	0.0526316		0.147005
w1118	16 h	5% Yeast	23	16	0.179487		9	15	0.25		0.214744		TßhnM18	16 h	5% Yeast	18	11	0.241379		9	19	0.357143		0.299261
w1118	16 h	5% Yeast	38	26	0.1875		16	28	0.272727		0.230114		TßhnM18	16 h	5% Yeast	7	6	0.0769231		11	12	0.0434783		0.0602007
w1118	16 h	5% Yeast	29	31	-0.0333333		19	26	0.155556		0.0611111		TßhnM18	16 h	5% Yeast	13	14	-0.037037		8	2	-0.6		-0.318519
w1118	16 h	5% Yeast	13	8	0.238095		5	6	0.0909091		0.164502		TßhnM18	16 h	5% Yeast	14	2	0.75		12	12	0		0.375
w1118	16 h	5% Yeast	35	23	0.206897		20	33	0.245283		0.22609		TßhnM18	16 h	5% Yeast	20	23	-0.0697674		8	14	0.272727		0.10148
w1118	16 h	5% Yeast	21	15	0.166667		14	18	0.125		0.145833		TßhnM18	16 h	5% Yeast	17	6	0.478261		4	12	0.5		0.48913
w1118	16 h	5% Yeast	23	13	0.277778		7	19	0.461538		0.369658		TßhnM18	16 h	5% Yeast	21	14	0.2		6	13	0.368421		0.284211
w1118	16 h	5% Yeast	21	16	0.135135		6	15	0.428571		0.281853		TßhnM18	16 h	5% Yeast	14	10	0.166667		8	14	0.272727		0.219697
Figure 6C
	Training	Test
	STM	2 min		2 M Sucrose					2 M Sucrose									2 M Sucrose					2 M Sucrose
				Reinforced					Reinforced									Reinforced					Reinforced
Genotype	Starvation	Reinforcer	Females	3OCT	MCH	AI		3OCT	MCH	AI		LI		Genotype	Starvation	Reinforcer	Females	3OCT	MCH	AI		3OCT	MCH	AI		LI
w1118	16 h	2 M sucrose	virgin	13	8	0.238095		8	11	0.157895		0.197995		w1118	16 h	2 M sucrose	mated	25	22	0.0638298		5	16	0.52381		0.29382
w1118	16 h	2 M sucrose	virgin	15	10	0.2		2	5	0.428571		0.314286		w1118	16 h	2 M sucrose	mated	12	15	-0.111111		11	15	0.153846		0.0213675
w1118	16 h	2 M sucrose	virgin	12	5	0.411765		13	14	0.037037		0.224401		w1118	16 h	2 M sucrose	mated	10	10	0		21	19	-0.05		-0.025
w1118	16 h	2 M sucrose	virgin	9	7	0.125		11	11	0		0.0625		w1118	16 h	2 M sucrose	mated	13	5	0.444444		7	10	0.176471		0.310458
w1118	16 h	2 M sucrose	virgin	15	10	0.2		9	13	0.181818		0.190909		w1118	16 h	2 M sucrose	mated	17	11	0.214286		7	17	0.416667		0.315476
w1118	16 h	2 M sucrose	virgin	12	6	0.333333		6	23	0.586207		0.45977		w1118	16 h	2 M sucrose	mated	40	36	0.0526316		17	23	0.15		0.101316
w1118	16 h	2 M sucrose	virgin	16	5	0.52381		9	12	0.142857		0.333333		w1118	16 h	2 M sucrose	mated	21	26	-0.106383		21	11	-0.3125		-0.209441
w1118	16 h	2 M sucrose	virgin	21	10	0.354839		7	15	0.363636		0.359238		w1118	16 h	2 M sucrose	mated	24	25	-0.0204082		29	34	0.0793651		0.0294785
w1118	16 h	2 M sucrose	virgin	12	9	0.142857		12	14	0.0769231		0.10989		w1118	16 h	2 M sucrose	mated	11	10	0.047619		36	48	0.142857		0.0952381
w1118	16 h	2 M sucrose	virgin	13	3	0.625		14	28	0.333333		0.479167		w1118	16 h	2 M sucrose	mated	36	24	0.2		14	18	0.125		0.1625
w1118	16 h	2 M sucrose	virgin	17	6	0.478261		6	20	0.538462		0.508361		w1118	16 h	2 M sucrose	mated	20	20	0		11	9	-0.1		-0.05
w1118	16 h	2 M sucrose	virgin	7	5	0.166667		4	6	0.2		0.183333		w1118	16 h	2 M sucrose	mated	29	23	0.115385		24	24	0		0.0576923
w1118	16 h	2 M sucrose	virgin	14	6	0.4		6	16	0.454545		0.427273		w1118	16 h	2 M sucrose	mated	36	26	0.16129		26	28	0.037037		0.0991637
														w1118	16 h	2 M sucrose	mated	18	19	-0.027027		35	35	0		-0.0135135
				2 M Sucrose					2 M Sucrose									2 M Sucrose					2 M Sucrose
				Reinforced					Reinforced									Reinforced					Reinforced
Genotype	Starvation	Reinforcer	Females	3OCT	MCH	AI		3OCT	MCH	AI		LI		Genotype	Starvation	Reinforcer	Females	3OCT	MCH	AI		3OCT	MCH	AI		LI
TßhnM18	16 h	2 M sucrose	virgin	13	8	0.238095		15	15	0		0.119048		TßhnM18	16 h	2 M sucrose	mated	9	14	-0.217391		9	15	0.25		0.0163043
TßhnM18	16 h	2 M sucrose	virgin	8	9	-0.0588235		5	8	0.230769		0.0859729		TßhnM18	16 h	2 M sucrose	mated	8	16	-0.333333		7	10	0.176471		-0.0784314
TßhnM18	16 h	2 M sucrose	virgin	15	7	0.363636		12	11	-0.0434783		0.160079		TßhnM18	16 h	2 M sucrose	mated	9	11	-0.1		9	13	0.181818		0.0409091
TßhnM18	16 h	2 M sucrose	virgin	16	15	0.0322581		7	9	0.125		0.078629		TßhnM18	16 h	2 M sucrose	mated	5	6	-0.0909091		13	20	0.212121		0.0606061
TßhnM18	16 h	2 M sucrose	virgin	8	10	-0.111111		14	18	0.125		0.00694444		TßhnM18	16 h	2 M sucrose	mated	10	12	-0.0909091		9	8	-0.0588235		-0.0748663
TßhnM18	16 h	2 M sucrose	virgin	16	11	0.185185		5	11	0.375		0.280093		TßhnM18	16 h	2 M sucrose	mated	10	8	0.111111		5	3	-0.25		-0.0694444
TßhnM18	16 h	2 M sucrose	virgin	14	15	-0.0344828		12	20	0.25		0.107759		TßhnM18	16 h	2 M sucrose	mated	20	18	0.0526316		13	29	0.380952		0.216792
TßhnM18	16 h	2 M sucrose	virgin	17	13	0.133333		5	7	0.166667		0.15		TßhnM18	16 h	2 M sucrose	mated	16	24	-0.2		15	11	-0.153846		-0.176923
TßhnM18	16 h	2 M sucrose	virgin	22	17	0.128205		19	27	0.173913		0.151059		TßhnM18	16 h	2 M sucrose	mated	29	12	0.414634		36	48	0.142857		0.278746
TßhnM18	16 h	2 M sucrose	virgin	15	14	0.0344828		8	10	0.111111		0.0727969		TßhnM18	16 h	2 M sucrose	mated	17	25	-0.190476		11	10	-0.047619		-0.119048
TßhnM18	16 h	2 M sucrose	virgin	12	2	0.714286		11	9	-0.1		0.307143		TßhnM18	16 h	2 M sucrose	mated	9	12	-0.142857		10	17	0.259259		0.0582011
														TßhnM18	16 h	2 M sucrose	mated	14	14	0		11	11	0		0
														TßhnM18	16 h	2 M sucrose	mated	15	13	0.0714286		8	9	0.0588235		0.0651261

## Sheet: sensory acuity
Genotype	3-Oct [1:100]	MCH [1:80]	Balance	Sucrose preference 2 M	N
w1118, TbhnM18; UAS-GlySRNAI	-0.56 ± 0.05*	-0.49 ± 0.06*	-0.23 ± 0.17	0.25 ± 0.06*	8 - 9
w1118;TbhnM18; mef-G4;	-0.37 ± 0.1*	-0.38 ± 0.08*	-0.10 ± 0.06	0.31 ± 0.05*	6 - 8
w1118;TbhnM18; mef-G4; UAS-GlySRNAI	-0.33 ± 0.06*	-0.2 ± 0.05*	-0.03 ± 0.02	0.38 ± 0.09*	6 - 9
w1118;TbhnM18; FB-G4;	-0.62 ± 0.06 *	-0.60 ± 0.08*	-0.20 ± 0.13	0.23 ± 0.07*	8 - 9
w1118;TbhnM18; FB-G4; UAS-GlySRNAI	-0.58 ± 0.08 *	-0.54 ± 0.11*	-0.12 ± 0.25	0.31 ± 0.07*	6 - 7
w1118;TbhnM18; FB-G4; mef2-G4	-0.20 ± 0.03*	-0.35 ± 0.07*	-0.28 ± 0.21	0.23 ± 0.05*	6 - 8
w1118;TbhnM18; FB-G4;mef2-G4; UAS-GlySRNAI	-0.19 ± 0.08 *	-0.3 ± 0.05*	-0.08 ± 0.08	0.26 ± 0.07*	6 - 9
P* < 0.05

## Sheet: Figure 6- figure suppl. 5 
Figure S5
	Body weight	mg/fly
	w1118	Tbhnm18	w1118	Tbhnm18
	sated	sated	starved 16h	starved 16h
	0.712	0.657	0.65	0.596
Food intake:
yeast [5%]	µl/mg fly
24h	w1118	Tbhnm18	w1118	Tbhnm18
	sated	sated	starved 16h	starved 16h
	0.203872	0.327796	0.913769	1.52523
	0.0939307	0.0536243	1.59964	1.01348
	0.139668	0.215651	0.872014	1.11407
	0.27925	0.372568	1.22826	1.52649
	0.227509	0.561654	0.829338	1.97884
	0.270918	0.203886	1.43208	1.37336
	0.0763814	0.431731	0.80014	1.53779
	0.122011	0.171428	0.649412	1.83666
	0.318837	0.411197	1.34955	1.10574
	0.151833	0.318683	0.0376566	0.343076
	0.325451	0.140044	0.639586	0.340632
	0.0501233	0.321659	0.0107507	0.493396
	0.108323	0.160808	0.00277234	0.141473
	0.638825	0.086901	0.0154172	0.530602
	0.204842	0.463546	0.203694	0.915732
	0.0381987	0.33052	0.366416	0.192386
	0.0825902	0.154249	0.212299	0.325387
	0.441911	0.231872	1.28295	1.81045
	0.0532698	0.115067	1.16433	1.40209
	0.508889	0.550968	1.69617	1.57933
	0.136241	0.613743	1.46979	1.50521
	0.169309	0.672943	1.74903	2.11475
	0.148266	0.702263	1.13453	1.12841
	0.320581	0.72976	1.69674	1.99966
	0.244103	0.722723	1.85388	1.82598
	0.532526	0.649747	1.72875	1.19492
Mean	0.226448	0.373655	0.959191	1.18674
STDEV	0.159494	0.217599	0.622407	0.611242
SEM	0.0312793	0.0426748	0.122064	0.119874
