# Supplementary material for: Octopamine integrates the status of internal energy supply into the formation of food-related memories
Source: eLife. 2024 Apr 24;12:RP88247. doi: 10.7554/eLife.88247 (PMC11042807; doi:10.7554/eLife.88247)
Supplement: Figure 7—source data 1. [file elife-88247-fig7-data1.xlsx]

## Sheet: Figure 7
Figure 7B
	Training	Test										Figure7C
	STM	2 min											Training	Test
													STM	2 min
		2 M Sucrose					2 M Sucrose								2 M Sucrose					2 M Sucrose								2 M Sucrose					2 M Sucrose								2 M Sucrose					2 M Sucrose
		Reinforced					Reinforced								Reinforced					Reinforced								Reinforced					Reinforced								Reinforced					Reinforced
Genotype	Starvation	3OCT	MCH	AI		3OCT	MCH	AI		LI			Genotype	Starvation	3OCT	MCH	AI		3OCT	MCH	AI		LI			Genotype	Starvation	3OCT	MCH	AI		3OCT	MCH	AI		LI			Genotype	Starvation	3OCT	MCH	AI		3OCT	MCH	AI		LI
Tdc2-Gal4/+	16 h	13	11	0.0833333		5	14	0.473684		0.278509			UAS-InRDn	16 h	8	4	0.333333		6	10	0.25		0.291667			Tßh;Tdc2-G4/+	16 h	4	10	-0.428571		1	11	0.833333		0.202381			Tßh;UAS-InRDN	16 h	12	14	-0.0769231		18	18	0		-0.0384615
Tdc2-Gal4/+	16 h	20	20	0		11	22	0.333333		0.166667			UAS-InRDn	16 h	19	7	0.461538		7	16	0.391304		0.426421			Tßh;Tdc2-G4/+	16 h	13	12	0.04		10	28	0.473684		0.256842			Tßh;UAS-InRDN	16 h	9	6	0.2		5	2	-0.428571		-0.114286
Tdc2-Gal4/+	16 h	17	15	0.0625		18	50	0.470588		0.266544			UAS-InRDn	16 h	11	9	0.1		2	17	0.789474		0.444737			Tßh;Tdc2-G4/+	16 h	30	19	0.22449		5	10	0.333333		0.278912			Tßh;UAS-InRDN	16 h	14	12	0.0769231		15	13	-0.0714286		0.00274725
Tdc2-Gal4/+	16 h	23	14	0.243243		11	29	0.45		0.346622			UAS-InRDn	16 h	18	12	0.2		7	25	0.5625		0.38125			Tßh;Tdc2-G4/+	16 h	11	12	-0.0434783		12	23	0.314286		0.135404			Tßh;UAS-InRDN	16 h	10	15	-0.2		15	3	-0.666667		-0.433333
Tdc2-Gal4/+	16 h	11	6	0.294118		1	12	0.846154		0.570136			UAS-InRDn	16 h	18	10	0.285714		14	28	0.333333		0.309524			Tßh;Tdc2-G4/+	16 h	9	15	-0.25		13	13	0		-0.125			Tßh;UAS-InRDN	16 h	21	6	0.555556		32	8	-0.6		-0.0222222
Tdc2-Gal4/+	16 h	24	11	0.371429		13	3	-0.625		-0.126786			UAS-InRDn	16 h	7	3	0.4		8	11	0.157895		0.278947			Tßh;Tdc2-G4/+	16 h	8	22	-0.466667		8	10	0.111111		-0.177778			Tßh;UAS-InRDN	16 h	11	17	-0.214286		13	21	0.235294		0.0105042
Tdc2-Gal4/+	16 h	31	20	0.215686		20	24	0.0909091		0.153298			UAS-InRDn	16 h	11	12	-0.0434783		6	24	0.6		0.278261			Tßh;Tdc2-G4/+	16 h	8	5	0.230769		5	7	0.166667		0.198718			Tßh;UAS-InRDN	16 h	7	24	-0.548387		25	20	-0.111111		-0.329749
Tdc2-Gal4/+	16 h	37	3	0.85		15	21	0.166667		0.508333			UAS-InRDn	16 h	20	16	0.111111		14	22	0.222222		0.166667			Tßh;Tdc2-G4/+	16 h	6	13	-0.368421		7	6	-0.0769231		-0.222672
Tdc2-Gal4/+	16 h	41	9	0.64		25	15	-0.25		0.195			UAS-InRDn	16 h	18	16	0.0588235		5	21	0.615385		0.337104			Tßh;Tdc2-G4/+	16 h	2	8	-0.6		4	8	0.333333		-0.133333
Tdc2-Gal4/+	16 h	32	15	0.361702		11	24	0.371429		0.366565			UAS-InRDn	16 h	9	7	0.125		3	8	0.454545		0.289773			Tßh;Tdc2-G4/+	16 h	13	19	-0.1875		12	10	-0.0909091		-0.139205
Tdc2-Gal4/+	16 h	38	18	0.357143		25	23	-0.0416667		0.157738			UAS-InRDn	16 h	14	8	0.272727		12	14	0.0769231		0.174825			Tßh;Tdc2-G4/+	16 h	11	12	-0.0434783		12	24	0.333333		0.144928
Tdc2-Gal4/+	16 h	17	3	0.7		13	24	0.297297		0.498649			UAS-InRDn	16 h	18	13	0.16129		12	15	0.111111		0.136201
Tdc2-Gal4/+	16 h	9	8	0.0588235		11	9	-0.1		-0.0205882			UAS-InRDn	16 h	28	23	0.0980392		25	36	0.180328		0.139184
Tdc2-Gal4/+	16 h	22	18	0.1		18	35	0.320755		0.210377
Tdc2-Gal4/+	16 h	24	20	0.0909091		12	23	0.314286		0.202597
Tdc2-Gal4/+	16 h	12	16	-0.142857		22	30	0.153846		0.00549451
		2 M Sucrose					2 M Sucrose
		Reinforced					Reinforced
Genotype	Starvation	3OCT	MCH	AI		3OCT	MCH	AI		LI
InRdn/+	16 h	21	16	0.135135		10	16	0.230769		0.182952
InRdn/+	16 h	22	8	0.466667		9	20	0.37931		0.422989
InRdn/+	16 h	10	11	-0.047619		5	8	0.230769		0.0915751
InRdn/+	16 h	16	7	0.391304		7	16	0.391304		0.391304
InRdn/+	16 h	15	11	0.153846		4	6	0.2		0.176923
InRdn/+	16 h	18	5	0.565217		14	18	0.125		0.345109
InRdn/+	16 h	35	20	0.272727		14	16	0.0666667		0.169697
InRdn/+	16 h	28	18	0.217391		17	40	0.403509		0.31045
InRdn/+	16 h	38	25	0.206349		27	36	0.142857		0.174603
InRdn/+	16 h	14	11	0.12		13	22	0.257143		0.188571
InRdn/+	16 h	16	10	0.230769		8	20	0.428571		0.32967
InRdn/+	16 h	17	13	0.133333		14	17	0.0967742		0.115054
		2 M Sucrose					2 M Sucrose
		Reinforced					Reinforced
Genotype	Starvation time	3OCT	MCH	AI		3OCT	MCH	AI		LI
Tdc2-Gal4/InRdn	16 h	19	17	0.0555556		3	10	0.538462		0.297009
Tdc2-Gal4/InRdn	16 h	13	13	0		7	7	0		0
Tdc2-Gal4/InRdn	16 h	23	22	0.0222222		18	33	0.294118		0.15817
Tdc2-Gal4/InRdn	16 h	11	8	0.157895		6	4	-0.2		-0.0210526
Tdc2-Gal4/InRdn	16 h	28	26	0.037037		16	31	0.319149		0.178093
Tdc2-Gal4/InRdn	16 h	27	18	0.2		13	22	0.257143		0.228571
Tdc2-Gal4/InRdn	16 h	43	30	0.178082		8	29	0.567568		0.372825
Tdc2-Gal4/InRdn	16 h	14	14	0		31	14	-0.377778		-0.188889
Tdc2-Gal4/InRdn	16 h	32	15	0.361702		25	35	0.166667		0.264184
Tdc2-Gal4/InRdn	16 h	31	12	0.44186		11	15	0.153846		0.297853
Tdc2-Gal4/InRdn	16 h	55	15	0.571429		29	26	-0.0545455		0.258442
Tdc2-Gal4/InRdn	16 h	11	10	0.047619		19	29	0.208333		0.127976
Tdc2-Gal4/InRdn	16 h	21	12	0.272727		15	11	-0.153846		0.0594406
Tdc2-Gal4/InRdn	16 h	14	18	-0.125		15	10	-0.2		-0.1625
Tdc2-Gal4/InRdn	16 h	12	18	-0.2		14	29	0.348837		0.0744186
Tdc2-Gal4/InRdn	16 h	31	28	0.0508475		15	15	0		0.0254237
Tdc2-Gal4/InRdn	16 h	39	16	0.418182		13	14	0.037037		0.227609
Figure 7D
	Training	Cold shock	Test
	STM	yes/ no	3h min
			2 M Sucrose					2 M Sucrose
			Reinforced					Reinforced
Genotype	Starvation	Cold-shock	3OCT	MCH	AI		3OCT	MCH	AI		LI
InRdn/+	16 h	NO	16	9	0.28		9	10	0.0526316		0.166316
InRdn/+	16 h	NO	12	11	0.0434783		7	14	0.333333		0.188406
InRdn/+	16 h	NO	14	8	0.272727		8	17	0.36		0.316364
InRdn/+	16 h	NO	11	14	-0.12		12	26	0.368421		0.124211
InRdn/+	16 h	NO	15	24	-0.230769		26	9	-0.485714		-0.358242
InRdn/+	16 h	NO	7	6	0.0769231		10	18	0.285714		0.181319
InRdn/+	16 h	NO	18	14	0.125		12	12	0		0.0625
InRdn/+	16 h	NO	13	24	-0.297297		16	15	-0.0322581		-0.164778
InRdn/+	16 h	NO	13	21	-0.235294		11	24	0.371429		0.0680672
InRdn/+	16 h	NO	27	21	0.125		18	30	0.25		0.1875
InRdn/+	16 h	NO	13	12	0.04		8	14	0.272727		0.156364
InRdn/+	16 h	NO	18	20	-0.0526316		20	42	0.354839		0.151104
InRdn/+	16 h	NO	19	18	0.027027		13	29	0.380952		0.20399
InRdn/+	16 h	NO	15	7	0.363636		14	15	0.0344828		0.19906
InRdn/+	16 h	NO	28	26	0.037037		4	18	0.636364		0.3367
InRdn/+	16 h	NO	16	4	0.6		10	24	0.411765		0.505882
InRdn/+	16 h	NO	26	10	0.444444		9	23	0.4375		0.440972
InRdn/+	16 h	NO	32	18	0.28		12	13	0.04		0.16
			2 M Sucrose					2 M Sucrose
			Reinforced					Reinforced
Genotype	Starvation	Cold-shock	3OCT	MCH	AI		3OCT	MCH	AI		LI
Tßh;Tdc2/+	16 h	NO	7	2	0.555556		5	7	0.166667		0.361111
Tßh;Tdc2/+	16 h	NO	17	8	0.36		3	8	0.454545		0.407273
Tßh;Tdc2/+	16 h	NO	14	5	0.473684		9	21	0.4		0.436842
Tßh;Tdc2/+	16 h	NO	11	30	-0.463415		7	22	0.517241		0.0269134
Tßh;Tdc2/+	16 h	NO	7	1	0.75		5	16	0.52381		0.636905
Tßh;Tdc2/+	16 h	NO	9	13	-0.181818		6	14	0.4		0.109091
Tßh;Tdc2/+	16 h	NO	11	12	-0.0434783		2	15	0.764706		0.360614
Tßh;Tdc2/+	16 h	NO	10	32	-0.52381		4	30	0.764706		0.120448
Tßh;Tdc2/+	16 h	NO	7	6	0.0769231		12	17	0.172414		0.124668
Tßh;Tdc2/+	16 h	NO	6	16	-0.454545		8	7	-0.0666667		-0.260606
Tßh;Tdc2/+	16 h	NO	10	10	0		12	14	0.0769231		0.0384615
Tßh;Tdc2/+	16 h	NO	14	14	0		4	31	0.771429		0.385714
Tßh;Tdc2/+	16 h	NO	15	7	0.363636		3	19	0.727273		0.545455
Tßh;Tdc2/+	16 h	NO	20	13	0.212121		18	19	0.027027		0.119574
Tßh;Tdc2/+	16 h	NO	12	15	-0.111111		11	35	0.521739		0.205314
Tßh;Tdc2/+	16 h	NO	12	14	-0.0769231		5	13	0.444444		0.183761
Tßh;Tdc2/+	16 h	NO	16	13	0.103448		3	16	0.684211		0.393829
Tßh;Tdc2/+	16 h	NO	11	4	0.466667		3	37	0.85		0.658333
			2 M Sucrose					2 M Sucrose
			Reinforced					Reinforced
Genotype	Starvation	Cold-shock	3OCT	MCH	AI		3OCT	MCH	AI		LI
Tßh/InRdn	16 h	NO	6	15	-0.428571		3	5	0.25		-0.0892857
Tßh/InRdn	16 h	NO	21	21	0		3	10	0.538462		0.269231
Tßh/InRdn	16 h	NO	11	9	0.1		5	12	0.411765		0.255882
Tßh/InRdn	16 h	NO	18	19	-0.027027		5	18	0.565217		0.269095
Tßh/InRdn	16 h	NO	6	17	-0.478261		5	16	0.52381		0.0227743
Tßh/InRdn	16 h	NO	10	10	0		17	10	-0.259259		-0.12963
Tßh/InRdn	16 h	NO	12	11	0.0434783		13	25	0.315789		0.179634
Tßh/InRdn	16 h	NO	5	18	-0.565217		10	16	0.230769		-0.167224
Tßh/InRdn	16 h	NO	4	16	-0.6		15	16	0.0322581		-0.283871
Tßh/InRdn	16 h	NO	26	13	0.333333		16	21	0.135135		0.234234
Tßh/InRdn	16 h	NO	22	28	-0.12		6	10	0.25		0.065
Tßh/InRdn	16 h	NO	19	9	0.357143		2	5	0.428571		0.392857
Tßh/InRdn	16 h	NO	5	3	0.25		7	10	0.176471		0.213235
Tßh/InRdn	16 h	NO	13	6	0.368421		12	22	0.294118		0.331269
Tßh/InRdn	16 h	NO	15	27	-0.285714		6	17	0.478261		0.0962733
Tßh/InRdn	16 h	NO	20	12	0.25		14	15	0.0344828		0.142241
			2 M Sucrose					2 M Sucrose
			Reinforced					Reinforced
Genotype	Starvation	Cold-shock	3OCT	MCH	AI		3OCT	MCH	AI		LI
Tßh;Tdc2-Gal4/InRdn	16 h	NO	5	4	0.111111		1	11	0.833333		0.472222
Tßh;Tdc2-Gal4/InRdn	16 h	NO	18	17	0.0285714		3	20	0.73913		0.383851
Tßh;Tdc2-Gal4/InRdn	16 h	NO	17	13	0.133333		2	25	0.851852		0.492593
Tßh;Tdc2-Gal4/InRdn	16 h	NO	18	26	-0.181818		9	22	0.419355		0.118768
Tßh;Tdc2-Gal4/InRdn	16 h	NO	11	20	-0.290323		11	13	0.0833333		-0.103495
Tßh;Tdc2-Gal4/InRdn	16 h	NO	17	10	0.259259		20	16	-0.111111		0.0740741
Tßh;Tdc2-Gal4/InRdn	16 h	NO	21	10	0.354839		18	20	0.0526316		0.203735
Tßh;Tdc2-Gal4/InRdn	16 h	NO	11	6	0.294118		4	11	0.466667		0.380392
Tßh;Tdc2-Gal4/InRdn	16 h	NO	3	10	-0.538462		4	13	0.529412		-0.00452489
Tßh;Tdc2-Gal4/InRdn	16 h	NO	12	6	0.333333		9	17	0.307692		0.320513
Tßh;Tdc2-Gal4/InRdn	16 h	NO	6	5	0.0909091		4	3	-0.142857		-0.025974
Tßh;Tdc2-Gal4/InRdn	16 h	NO	29	13	0.380952		4	18	0.636364		0.508658
Tßh;Tdc2-Gal4/InRdn	16 h	NO	3	8	-0.454545		3	9	0.5		0.0227273
Tßh;Tdc2-Gal4/InRdn	16 h	NO	41	9	0.64		18	13	-0.16129		0.239355
Tßh;Tdc2-Gal4/InRdn	16 h	NO	18	4	0.636364		4	20	0.666667		0.651515
Tßh;Tdc2-Gal4/InRdn	16 h	NO	39	19	0.344828		16	21	0.135135		0.239981
			2 M Sucrose					2 M Sucrose
			Reinforced					Reinforced
Genotype	Starvation time	Cold-shock	3OCT	MCH	AI		3OCT	MCH	AI		LI
InRdn/+	16 h	YES	26	22	0.0833333		17	27	0.227273		0.155303
InRdn/+	16 h	YES	24	24	0		19	29	0.208333		0.104167
InRdn/+	16 h	YES	21	28	-0.142857		12	20	0.25		0.0535714
InRdn/+	16 h	YES	21	13	0.235294		21	16	-0.135135		0.0500795
InRdn/+	16 h	YES	29	14	0.348837		13	30	0.395349		0.372093
InRdn/+	16 h	YES	13	21	-0.235294		10	17	0.259259		0.0119826
InRdn/+	16 h	YES	20	16	0.111111		21	14	-0.2		-0.0444444
InRdn/+	16 h	YES	35	19	0.296296		18	16	-0.0588235		0.118736
InRdn/+	16 h	YES	6	19	-0.52		16	16	0		-0.26
InRdn/+	16 h	YES	19	19	0		8	9	0.0588235		0.0294118
InRdn/+	16 h	YES	16	12	0.142857		19	18	-0.027027		0.0579151
InRdn/+	16 h	YES	10	18	-0.285714		7	22	0.517241		0.115764
InRdn/+	16 h	YES	31	30	0.0163934		11	17	0.214286		0.11534
InRdn/+	16 h	YES	15	9	0.25		9	8	-0.0588235		0.0955882
InRdn/+	16 h	YES	14	12	0.0769231		6	21	0.555556		0.316239
InRdn/+	16 h	YES	23	24	-0.0212766		13	15	0.0714286		0.025076
InRdn/+	16 h	YES	19	22	-0.0731707		19	17	-0.0555556		-0.0643631
InRdn/+	16 h	YES	17	12	0.172414		13	14	0.037037		0.104725
			2 M Sucrose					2 M Sucrose
			Reinforced					Reinforced
Genotype	Starvation time	Cold-shock	3OCT	MCH	AI		3OCT	MCH	AI		LI
Tßh;Tdc2/+	16 h	YES	3	8	-0.454545		4	7	0.272727		-0.0909091
Tßh;Tdc2/+	16 h	YES	18	10	0.285714		7	18	0.44		0.362857
Tßh;Tdc2/+	16 h	YES	12	7	0.263158		5	15	0.5		0.381579
Tßh;Tdc2/+	16 h	YES	15	2	0.764706		12	9	-0.142857		0.310924
Tßh;Tdc2/+	16 h	YES	12	7	0.263158		5	8	0.230769		0.246964
Tßh;Tdc2/+	16 h	YES	8	10	-0.111111		12	5	-0.411765		-0.261438
Tßh;Tdc2/+	16 h	YES	13	26	-0.333333		9	17	0.307692		-0.0128205
Tßh;Tdc2/+	16 h	YES	12	36	-0.5		8	16	0.333333		-0.0833333
Tßh;Tdc2/+	16 h	YES	11	9	0.1		13	20	0.212121		0.156061
Tßh;Tdc2/+	16 h	YES	48	12	0.6		3	14	0.647059		0.623529
Tßh;Tdc2/+	16 h	YES	8	28	-0.555556		9	58	0.731343		0.0878939
Tßh;Tdc2/+	16 h	YES	3	16	-0.684211		7	20	0.481481		-0.101365
Tßh;Tdc2/+	16 h	YES	12	12	0		9	20	0.37931		0.189655
Tßh;Tdc2/+	16 h	YES	24	14	0.263158		12	36	0.5		0.381579
Tßh;Tdc2/+	16 h	YES	11	13	-0.0833333		5	18	0.565217		0.240942
Tßh;Tdc2/+	16 h	YES	10	8	0.111111		14	19	0.151515		0.131313
Tßh;Tdc2/+	16 h	YES	11	12	-0.0434783		9	15	0.25		0.103261
Tßh;Tdc2/+	16 h	YES	14	11	0.12		9	16	0.28		0.2
			2 M Sucrose					2 M Sucrose
			Reinforced					Reinforced
Genotype	Starvation time	Cold-shock	3OCT	MCH	AI		3OCT	MCH	AI		LI
Tßh/InRdn	16 h	YES	14	5	0.473684		6	9	0.2		0.336842
Tßh/InRdn	16 h	YES	16	8	0.333333		3	12	0.6		0.466667
Tßh/InRdn	16 h	YES	3	4	-0.142857		4	3	-0.142857		-0.142857
Tßh/InRdn	16 h	YES	5	7	-0.166667		15	31	0.347826		0.0905797
Tßh/InRdn	16 h	YES	18	30	-0.25		16	43	0.457627		0.103814
Tßh/InRdn	16 h	YES	4	7	-0.272727		11	6	-0.294118		-0.283422
Tßh/InRdn	16 h	YES	15	15	0		10	18	0.285714		0.142857
Tßh/InRdn	16 h	YES	6	4	0.2		2	12	0.714286		0.457143
Tßh/InRdn	16 h	YES	21	47	-0.382353		10	22	0.375		-0.00367647
Tßh/InRdn	16 h	YES	28	14	0.333333		9	16	0.28		0.306667
Tßh/InRdn	16 h	YES	14	6	0.4		9	12	0.142857		0.271429
Tßh/InRdn	16 h	YES	9	5	0.285714		12	16	0.142857		0.214286
Tßh/InRdn	16 h	YES	6	8	-0.142857		7	18	0.44		0.148571
Tßh/InRdn	16 h	YES	14	18	-0.125		10	26	0.444444		0.159722
Tßh/InRdn	16 h	YES	18	12	0.2		11	18	0.241379		0.22069
Tßh/InRdn	16 h	YES	21	20	0.0243902		4	40	0.818182		0.421286
			2 M Sucrose					2 M Sucrose
			Reinforced					Reinforced
Genotype	Starvation time	Cold-shock	3OCT	MCH	AI		3OCT	MCH	AI		LI
Tßh;Tdc2-Gal4/InRdn	16 h	YES	8	9	-0.0588235		6	23	0.586207		0.263692
Tßh;Tdc2-Gal4/InRdn	16 h	YES	10	8	0.111111		6	19	0.52		0.315556
Tßh;Tdc2-Gal4/InRdn	16 h	YES	13	26	-0.333333		8	4	-0.333333		-0.333333
Tßh;Tdc2-Gal4/InRdn	16 h	YES	9	8	0.0588235		5	9	0.285714		0.172269
Tßh;Tdc2-Gal4/InRdn	16 h	YES	8	6	0.142857		10	10	0		0.0714286
Tßh;Tdc2-Gal4/InRdn	16 h	YES	6	1	0.714286		16	7	-0.391304		0.161491
Tßh;Tdc2-Gal4/InRdn	16 h	YES	9	8	0.0588235		11	12	0.0434783		0.0511509
Tßh;Tdc2-Gal4/InRdn	16 h	YES	13	7	0.3		13	32	0.422222		0.361111
Tßh;Tdc2-Gal4/InRdn	16 h	YES	7	10	-0.176471		7	5	-0.166667		-0.171569
Tßh;Tdc2-Gal4/InRdn	16 h	YES	12	12	0		5	17	0.545455		0.272727
Tßh;Tdc2-Gal4/InRdn	16 h	YES	18	9	0.333333		4	10	0.428571		0.380952
Tßh;Tdc2-Gal4/InRdn	16 h	YES	19	20	-0.025641		6	60	0.818182		0.39627
Tßh;Tdc2-Gal4/InRdn	16 h	YES	9	12	-0.142857		15	30	0.333333		0.0952381
Tßh;Tdc2-Gal4/InRdn	16 h	YES	5	9	-0.285714		2	10	0.666667		0.190476
Tßh;Tdc2-Gal4/InRdn	16 h	YES	18	8	0.384615		17	22	0.128205		0.25641
Tßh;Tdc2-Gal4/InRdn	16 h	YES	18	9	0.333333		59	6	-0.815385		-0.241026
Tßh;Tdc2-Gal4/InRdn	16 h	YES	24	12	0.333333		3	29	0.8125		0.572917

## Sheet: Sensory acuity
Genotype	3-Oct [1:100]	MCH [1:80]	Balance	Sucrose preference 2 M	N
w1118, Tdc2-G4	0.23 ± 0.06*	-0.23 ± 0.09*	0.02 ± 0.09	-0.23 ± 0.08	7 - 13
w1118;UAS-InRDN	0.20 ± 0.05*	-0.29 ± 0.08 *	0.02 ± 0.06	-0.25 ± 0.04	6 - 13
w1118;Tdc2-G4; UAS-inRDN	0.18 ± 0.05*	-0.27 ± 0.08*	0.05 ± 0.06	-0.32 ± 0.07	6 - 10
Genotype	3-Oct [1:100]	MCH [1:80]	Balance	Sucrose preference 2 M	N
w1118, TbhnM18; Tdc2-G4	-0.69 ± 0.05*	-0.43 ± 0.08*	-0.02 ± 0.04	0.43 ± 0.08*	7 - 11
w1118;TbhnM18;UAS-InRDN	-0.26 ± 0.11*	-0.47 ± 0.09*	-0.12 ± 0.14	0.29 ± 0.1*	7 - 10
w1118;TbhnM18; Tdc2-G4; UAS-InRDN	-0.7 ± 0.05*	-0.41 ± 0.09*	-0.14 ± 0.11	0.25 ± 0.08*	6 - 11
P* < 0.05
