# Supplementary material for: Octopamine integrates the status of internal energy supply into the formation of food-related memories
Source: eLife. 2024 Apr 24;12:RP88247. doi: 10.7554/eLife.88247 (PMC11042807; doi:10.7554/eLife.88247)
Supplement: Figure 8—source data 1. [file elife-88247-fig8-data1.xlsx]

## Sheet: Figure 8
Figure 8B
	Body weight
	w1118	w1118	Tbhnm18	Tbhnm18
	Straved 16h	starved 40h	Straved 16h	starved 40h
	0.65	0.55608	0.596	0.499
Food intake:
sucrose [5%]	µl/mg fly
	w1118	Tbhnm18	w1118	Tbhnm18
Starved	16h	16h	40h	40h
	0.598788	0.731771	0.782363	1.38482
	0.857967	0.770292	1.05933	1.11427
	0.908061	0.386798	1.0876	1.23737
	0.908546	0.237675	0.968606	0.972096
	0.906322	0.616552	1.16937	1.04639
	0.76496	0.278645	1.06251	1.11512
	0.779528	0.528096	1.09122	1.10287
	1.08634	0.766127	0.845779	1.17009
	0.760204	0.583825	0.825003	1.15544
	0.832596	0.54804	0.666142	1.34671
	0.75288	0.553112	0.702098	1.34087
	0.774482	0.585307	0.956698	1.32721
	0.967896	0.597045	1.05726	1.55709
	0.785869	0.47552	0.673627	1.10054
	0.835148	0.683792	0.626275	1.00008
	0.707482	0.627835	0.653699	1.16514
	0.784668	0.225711	0.737939	1.43206
	0.791412	0.142115	0.726649	0.736198
	0.688725	0.650082	0.784171	0.831724
	0.852088	0.541734	0.822125	0.899127
MEAN	0.817198	0.526504	0.864923	1.15176
STDEV	0.106484	0.182916	0.175176	0.208084
SEM	0.0238104	0.0409012	0.0391706	0.046529
Food intake:
sucrose [5%]+ yeast [5%]	µl/mg fly
	w1118	Tbhnm18	w1118	Tbhnm18
Starved	16h	16h	40h	40h
	1.75413	1.37365	3.20246	3.46629
	1.82407	1.88016	3.54413	2.15774
	2.24622	1.47176	1.89869	2.73172
	1.70724	1.24608	2.6876	1.25319
	1.81801	1.75102	1.89314	2.75551
	1.75623	1.2593	2.672	1.54418
	2.16825	1.26375	2.30207	2.68734
	1.83632	1.5275	2.27709	2.67576
	1.89572	1.58683	2.55581	3.55689
	1.99833	1.68355	1.89735	2.37999
	1.43779	1.25389	0.371567	2.16415
	1.94701	1.86326	1.66938	3.76994
	1.38576	1.74001	0.291095	3.08555
	1.87614	1.56561	2.51475	2.18702
	1.72849	1.62796	3.05732	3.22243
	1.95662	1.81715	3.20697	3.54758
	2.08821	1.19384	1.30898	2.82849
	1.92079	0.890976	2.16768	2.48656
	1.44209	1.2784	2.24391	2.76043
	1.33566	1.28343	1.78927	2.40033
	1.28258	1.13447	2.42566	3.43244
	1.29917	1.11665		2.67811
	1.09923	1.54057		3.5272
	1.1585	0.956194		2.79433
	1.26058	0.921143		3.01553
	1.07367	1.04108
MEAN	1.66526	1.39493	2.18938	2.76435
STDEV	0.344497	0.297533	0.831339	0.624787
SEM	0.0675613	0.058351	0.181413	0.124957
Figure 8C
Food intake:
sucrose [5%]
	µl/mg fly
	UAS-InRDN/+	Tbhnm18; UAS-InRDN	Tbhnm18; Tdc2-G4/+	Tbhnm18; Tdc2-G4/UAS-InRDN
	1.00045	0.407908	0.817044	1.13505
	1.57517	0.421964	0.833329	1.14095
	1.97244	0.463204	0.846827	1.14138
	1.48276	0.46483	0.904403	1.14539
	1.50519	0.51761	0.907986	1.16418
	1.54884	0.523418	0.908942	1.17677
	1.39122	0.612339	0.923316	1.17828
	1.647	0.743635	0.930562	1.27462
	1.25244	0.790335	0.931518	1.28327
	1.27205	0.795795	0.937822	1.315
	0.941549	0.81171	0.940238	1.328
	1.23254	0.830646	0.993752	1.35469
	1.1566	0.912196	1.02138	1.42213
	0.874922	1.08637	1.02242	1.42472
	1.29267	1.16184	1.03305	1.4319
	1.2437	1.22097	1.04802	1.50554
	1.27002	1.22283	1.07319	1.54377
	0.984991	1.22818	1.10018	1.55309
	1.28779	1.23875	1.1005	1.60689
	1.25442	1.2856	1.11018	1.63405
	0.896517		1.1334
	1.40624		1.14376
	0.932701		1.17281
	1.33365		1.17428
	1.56387		1.23313
	1.22077		1.34291
			1.38814
			1.54159
MEAN	1.29002	0.837007	1.0541	1.33798
STDEV	0.261544	0.314896	0.173006	0.169435
SEM	0.051293	0.0704128	0.0326951	0.0378868
