# Supplementary material for: Octopamine integrates the status of internal energy supply into the formation of food-related memories
Source: eLife journal article supplement (doi:10.7554/elife.88247), 2023-07-03
Supplement: figures [file elife-88247-figures-v1.pdf]

---

## Figures and figure supplements

Octopamine integrates the status of internal energy supply into the formation of food-related memories

**Michael Berger *et al.***

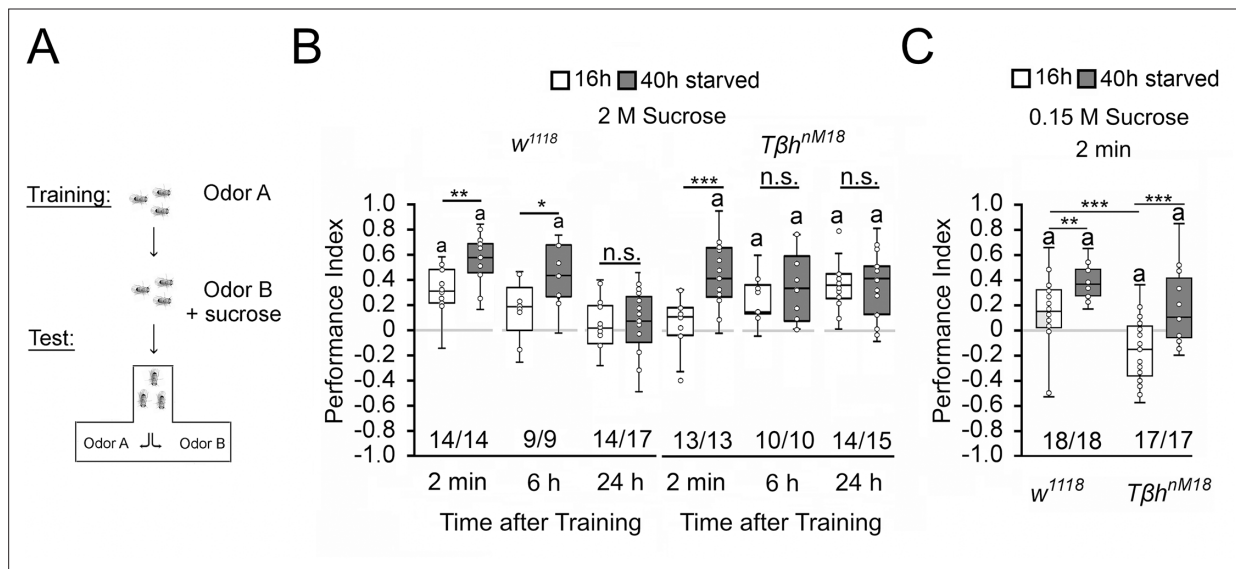

**Figure 1.** Starvation influences the strength of memory. **(A)** Appetitive olfactory learning and memory paradigm. **(B)** Appetitive 2 min short-term memory (STM), 6 hr and 24 hr memory of  $w^{1118}$  or  $T\beta h^{NM18}$  that were starved either for 16 hr (white bars) or 40 hr (dark gray bars) before the training. 2 M sucrose was used as reward. **(C)** 0.15 M sucrose was used as reinforcer. Prolonged starvation increases memory performance. Prolonged starvation from 16 hr to 40 hr leads to the formation of STM in  $T\beta h^{NM18}$ . Independent of the duration of starvation, 6 hr after training, memory appeared in the mutants. **(C)**  $T\beta h^{NM18}$  mutants starved for 16 hr developed an aversive STM to 0.15 M sucrose. After 40 hr of starvation, the mutants developed an appetitive STM. Numbers below box plots indicate pairs of reciprocally trained independent groups of male flies. The letter 'a' marks a significant difference from random choice as determined by a one-sample sign test ( $p < 0.05$ ). Student's t-tests were used to determine differences between two groups. For differences between more than two groups, one-way ANOVA with Tukey's post hoc Honest Significant Difference (HSD) test was used. (\* $p < 0.05$ ; \*\* $p < 0.01$ ; \*\*\* $p < 0.001$ ).

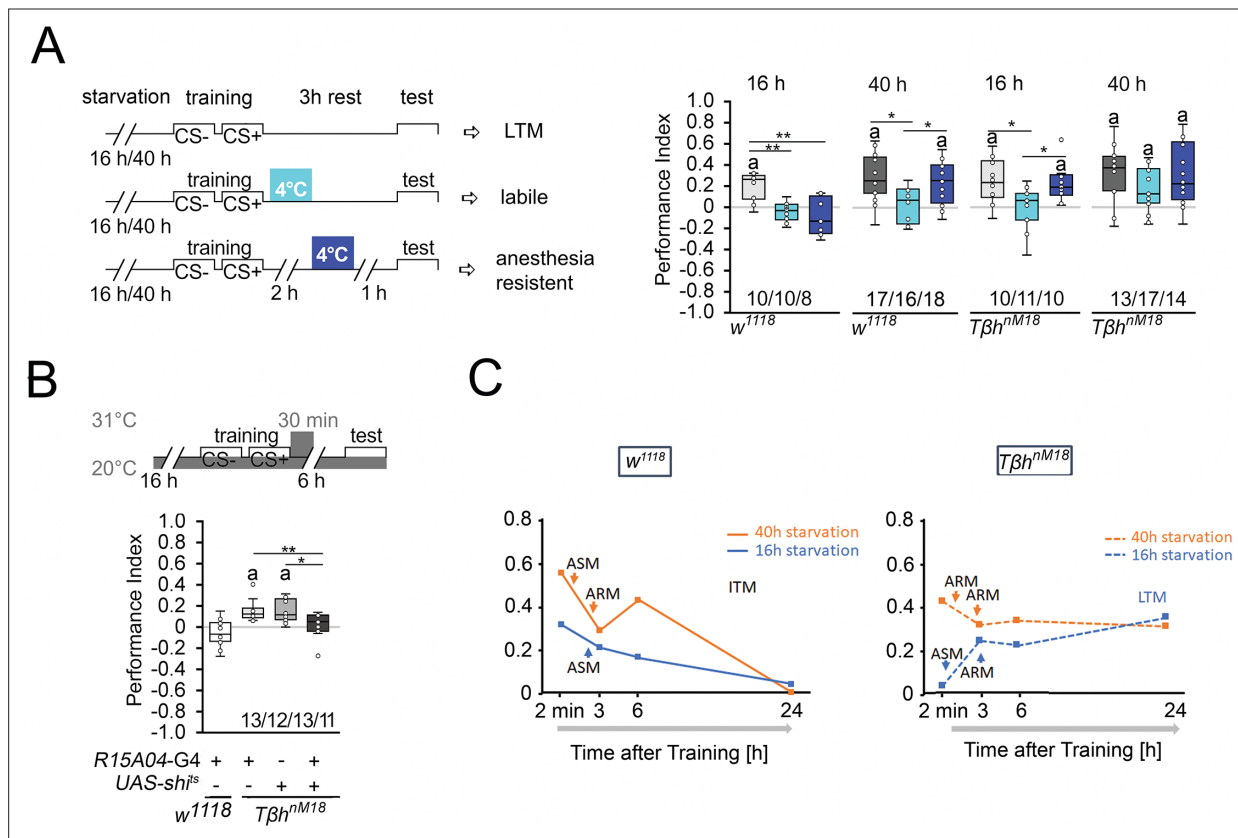

**Figure 2.** Starvation influences the type of memory. **(A)** Appetitive short-term memory (STM) training with 2 M sucrose and cold shock directly or 2 hr after training. Mildly starved control flies exhibit an appetitive memory sensitive to cold shock 3 hr after training. Severely starved control flies develop a memory that is initially sensitive to cold shock, but becomes insensitive after 2 hr. This phenotype is shared with mildly starved  $T\beta h^{NM18}$  mutants. Prolonged starvation in the mutants shifts memory to cold-shock-insensitive memory. **(B)** To block neuronal activity and the formation of LTM, a 30 min heat shift was applied immediately after training to flies expressing a temperature-sensitive *shibire* transgene under the control of the R1504-Gal4 driver. The block results in  $T\beta h^{NM18}$  mutants losing LTM. Numbers below box plots indicate pairs of reciprocally trained independent groups of male flies. The letter 'a' marks a significant difference from random choice as determined by a one-sample sign test ( $p < 0.05$ ). One-way ANOVA with Tukey's post hoc Honest Significant Difference (HSD) test or for data in **(A)** and Kruskal–Wallis followed by post hoc Dunn's test and Bonferroni correction was used to determine differences in **(B)**. \* $p < 0.05$ ; \*\* $p < 0.01$ . **(C)** Model summarizing memory performance of control and mutant flies that were either starved for 16 hr (blue line) or 40 hr (orange line). The dots present the average of the data presented in **Figures 1** and **Figure 2**. ASM: anesthesia-sensitive memory; ARM: anesthesia-resistant memory; ITM: intermediate memory; LTM: long-term memory. Source data see **Figure 2—source data 1**.

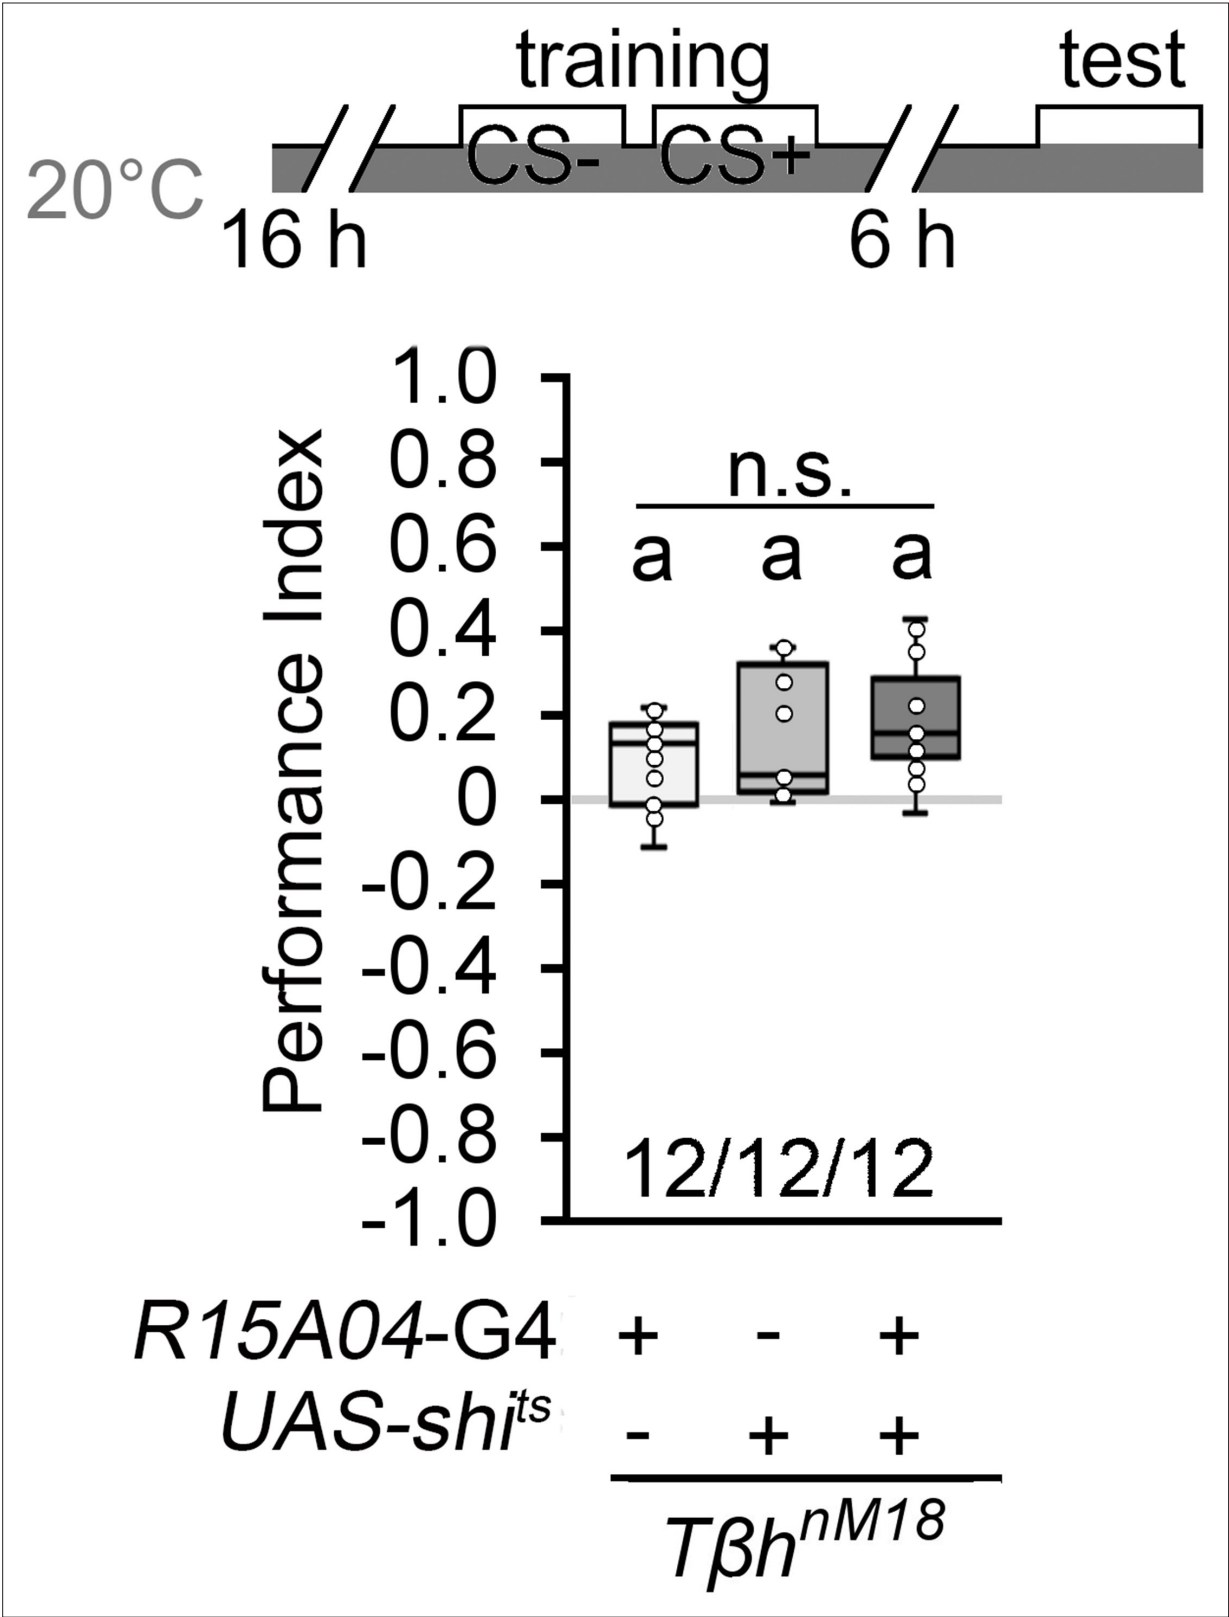

**Figure 2—figure supplement 1.** Controls for heat shift experiment in **Figure 2B**. To control for memory performance without a heat shift, flies expressing a temperature-sensitive *shibire* transgene under the control of the R1504-Gal4 driver were trained and tested at the permissive temperature and compared to the respective controls. The tested groups showed memory 6 hr after the training and did not differ from each other. Flies were starved for 16 hr and 2 M sucrose was used as reinforcer. The behavior differed from random choice as determined using a one-sample sign test and **Figure 2—figure supplement 1 continued on next page**



*Figure 2—figure supplement 1 continued*

marked with the letter 'a' ( $p < 0.05$ ). The one-way ANOVA with post hoc Tukey's Honest Significant Difference (HSD) was used to analyze difference between groups. n.s = no significant differences.

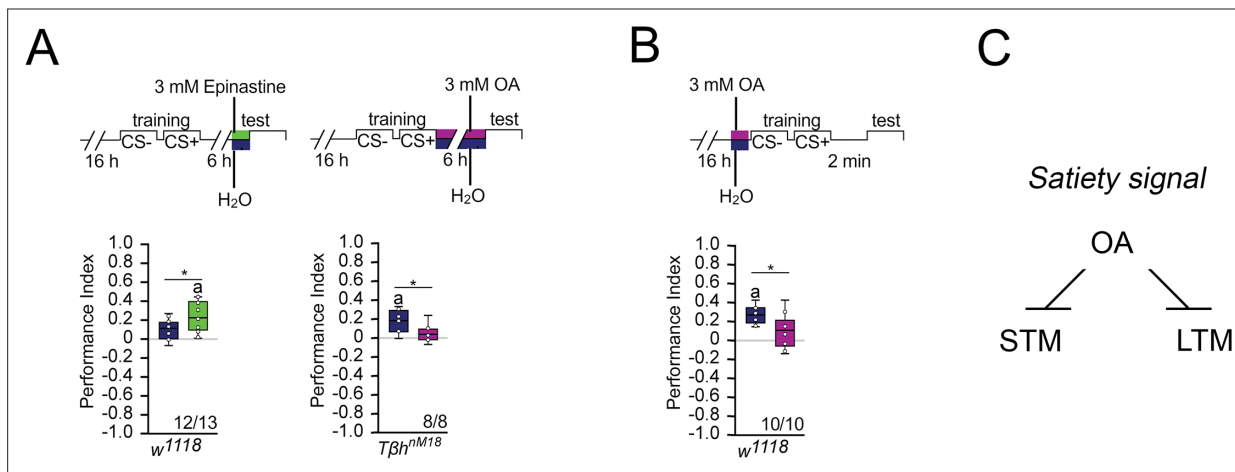

**Figure 3.** Octopamine suppresses memory. **(A)** Feeding 3 mM of the octopamine receptor antagonist epinastine for 1 hr after training resulted in memory 6 hr later in *w<sup>1118</sup>* flies. Feeding 3 mM octopamine for 6 hr after training suppresses long-term memory (LTM) in *Tβh<sup>NM18</sup>*. **(B)** A 3 mM octopamine feeding pulse 30 min before training inhibits short-term memory (STM) in *Tβh<sup>NM18</sup>* mutants. Controls were water-fed. **(A, B)** Flies were starved for 16 hr and 2 M sucrose was used as reinforcer. The letter 'a' marks a significant difference from random choice as determined by a one-sample sign test ( $p < 0.05$ ). Student's *t*-tests were used to determine differences between two groups ( $*p < 0.05$ ). Numbers below box plots indicate pairs of reciprocally trained independent groups of male flies. **(C)** Model for memory suppression.

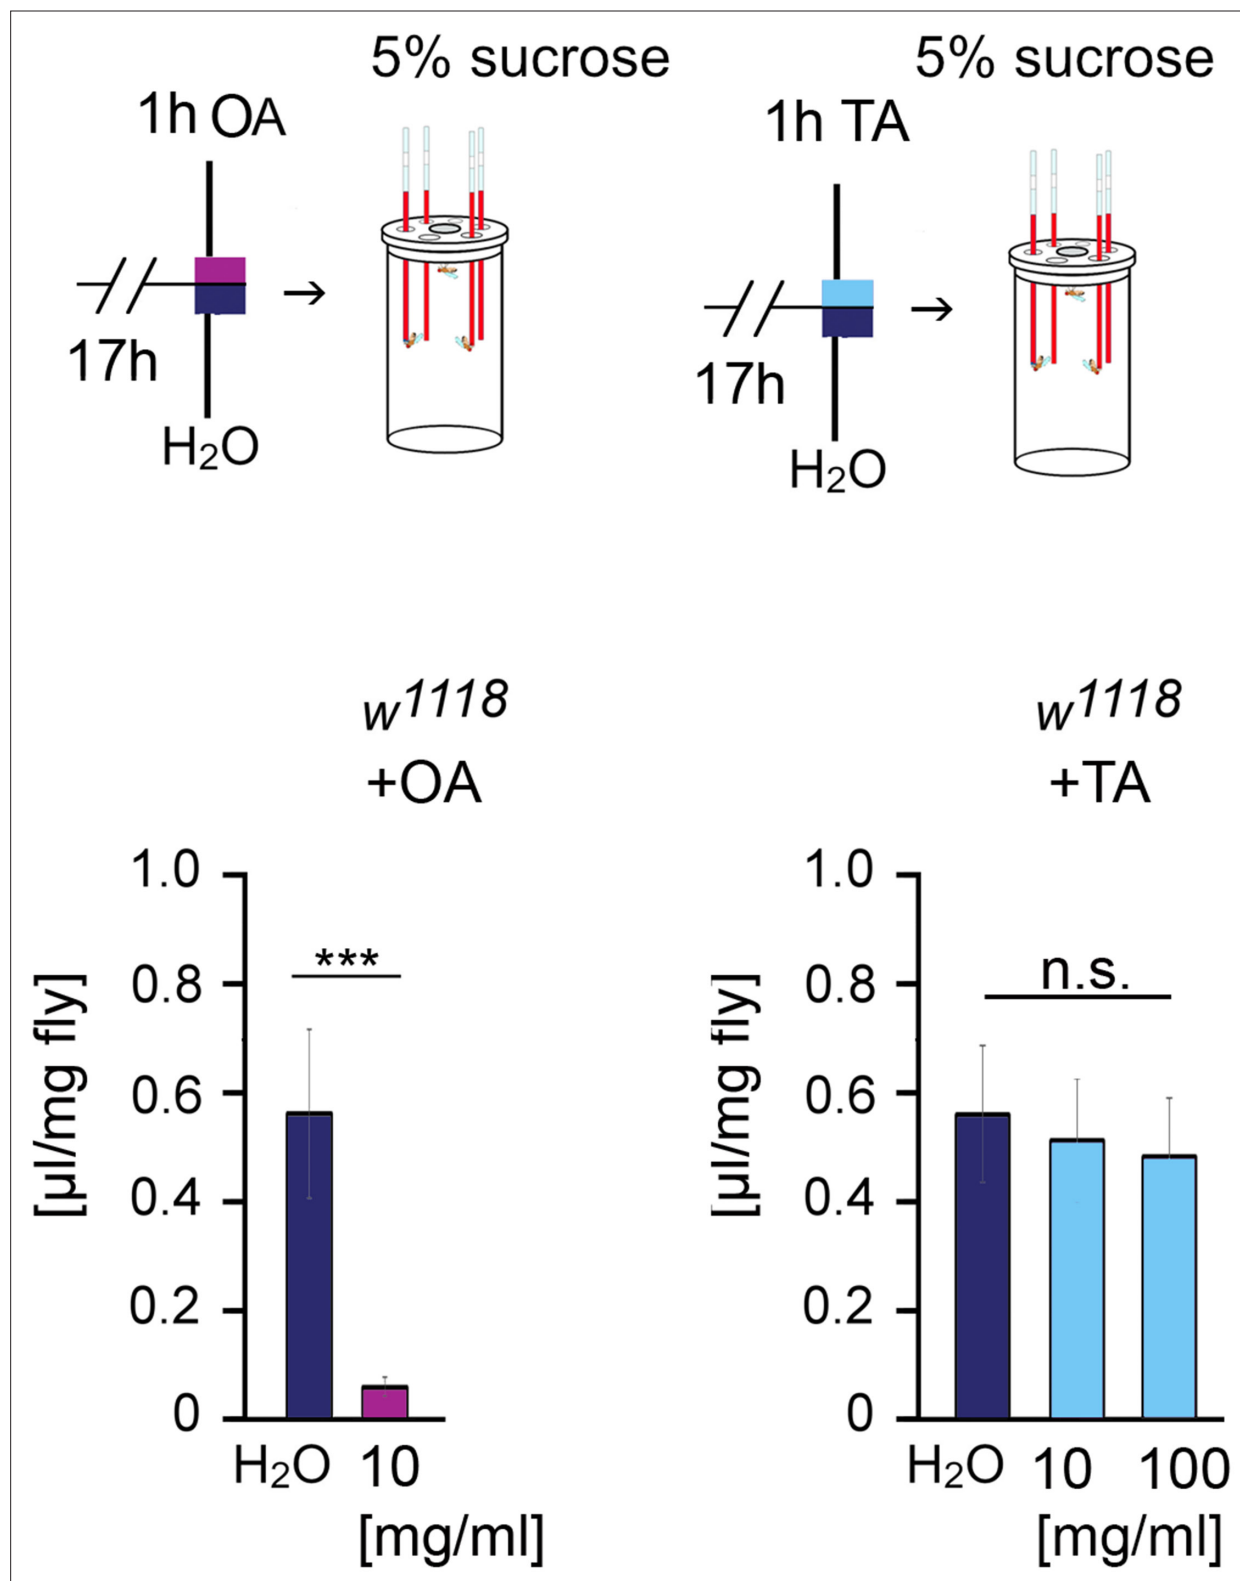

**Figure 3—figure supplement 1.** Octopamine but not tyramine suppresses food intake. The *w<sup>1118</sup>* flies were starved for 17 hr followed by feeding 1 hr octopamine (10 mg/ml), tyramine (10 or 100 mg/ml), or water. The intake of 5% sucrose after 3 hr was determined using the CAFÉ assay. Student's *t*-tests were used to determine differences between two groups and one-way ANOVA with Tukey's post hoc Honest Significant Difference (HSD) test between three groups. \*\*\**p*<0.001; n.s. = non-significant. N = 13–20 groups of 20 male flies.

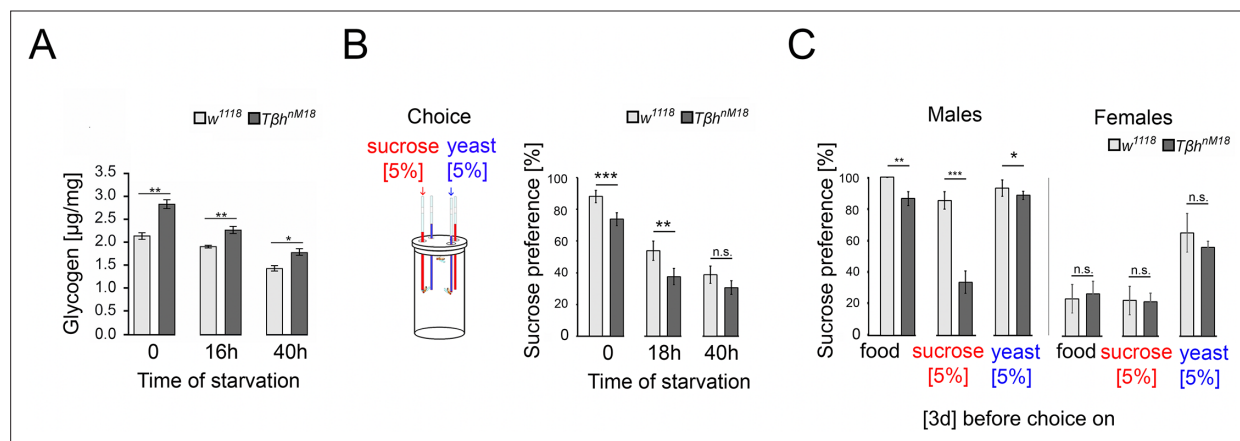

**Figure 4.** Elevated glycogen levels correlate with reduced sucrose preference. **(A)** Analysis of whole-body glycogen levels in *w<sup>1118</sup>* and *Tβh<sup>nm18</sup>* flies. In *Tβh<sup>nm18</sup>* flies, glycogen content is significantly higher than those in *w<sup>1118</sup>* flies under similar starvation conditions. N = 3 groups of five male flies. **(B)** Flies were starved 18 hr or 40 hr before food intake was measured for 24 hr. Flies chose between 5% sucrose and 5% yeast. The preference was determined. All flies showed a significant preference for sucrose consumption. Starvation reduced the preference. *Tβh<sup>nm18</sup>* showed a significantly reduced preference for sucrose in comparison to control flies, but not after 40 hr starvation. N = 20–26 groups of eight flies. **(C)** Feeding male flies for 3 d on standard fly food (food), 5% sucrose, or 5% yeast resulted in control flies preferring to consume sucrose. Male *Tβh<sup>nm18</sup>* mutants fed normal food, sucrose, and yeast showed a significant reduction in sucrose preference. Female flies of controls and mutants did not differ in their preferences. N = 14–28 groups of eight flies. To determine differences between two groups, the Mann–Whitney *U* test was used. \**p*<0.05; \*\**p*<0.01; \*\*\**p*<0.001.

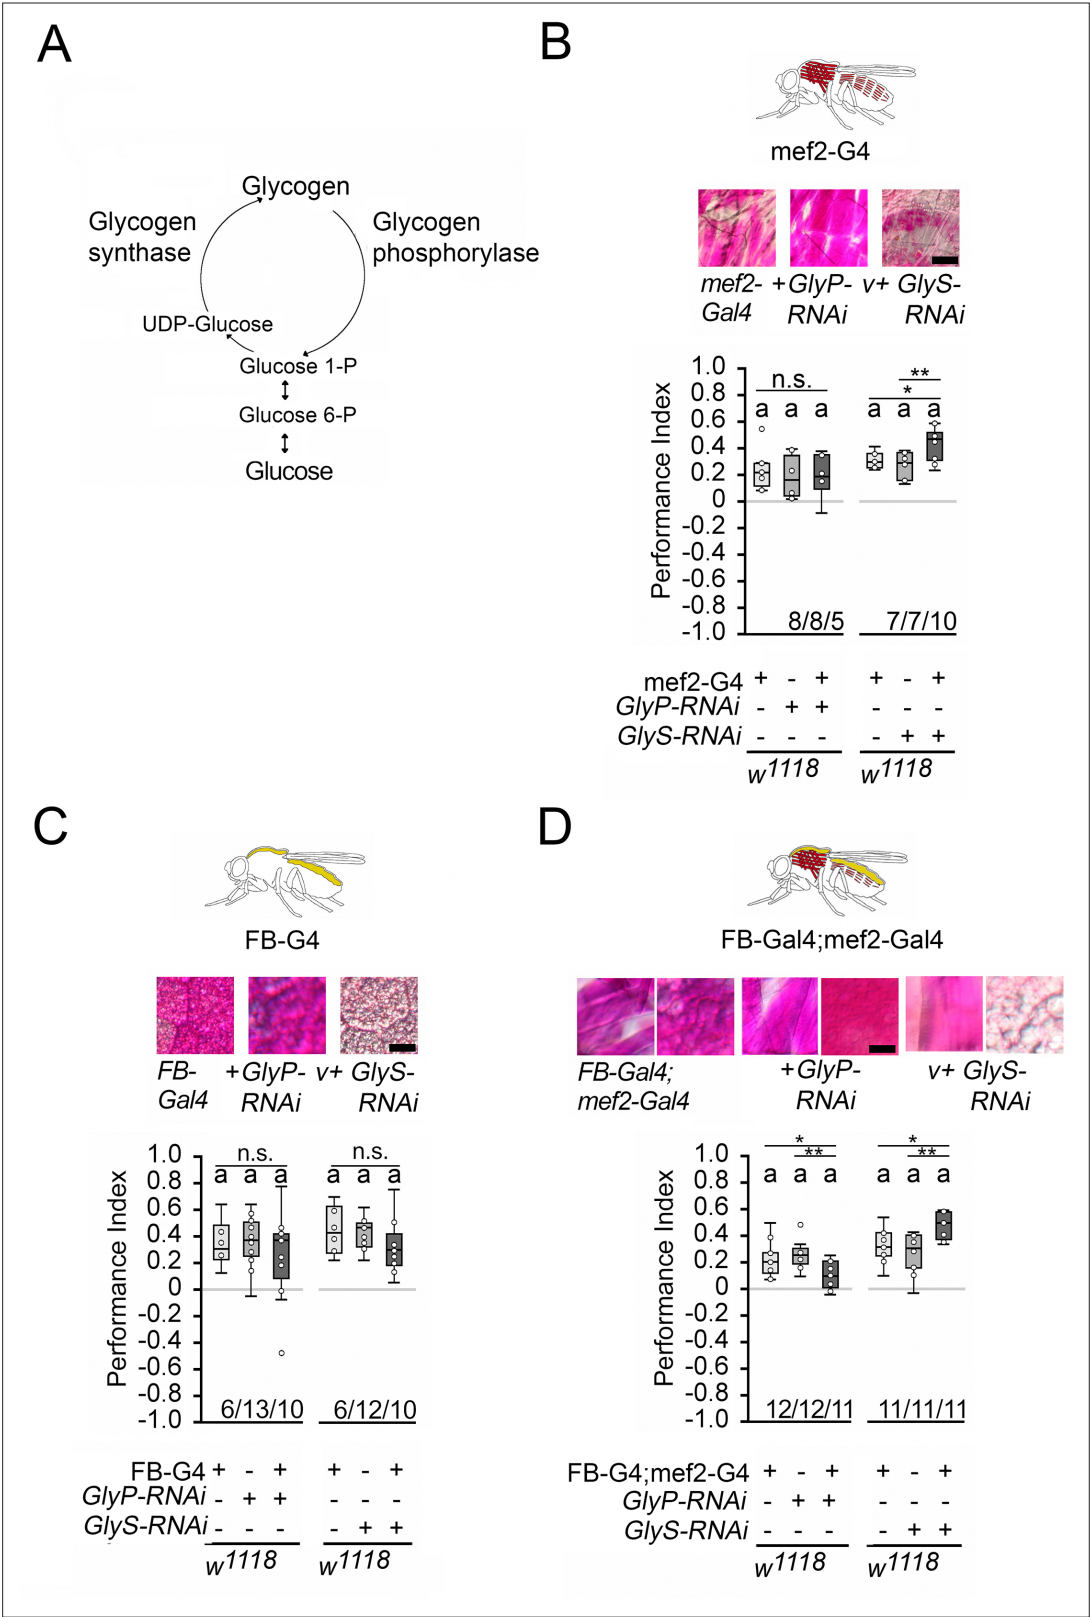

*Figure 5 continued*

interfere with STM. **(D)** A combined increase in glycogen in muscles and fat bodies reduced STM, and a decrease in glycogen increased STM. Flies were starved for 16 hr and 2 M sucrose was used as reinforcer. Numbers below box plots indicate one pair of reciprocally trained independent fly groups. The letter 'a' marks a significant difference from random choice as determined by a one-sample sign test ( $p < 0.05$ ). The one-way ANOVA with post hoc Tukey's Honest Significant Difference (HSD) was used to determine differences between three groups ( $*p < 0.05$ ;  $**p < 0.01$ ).

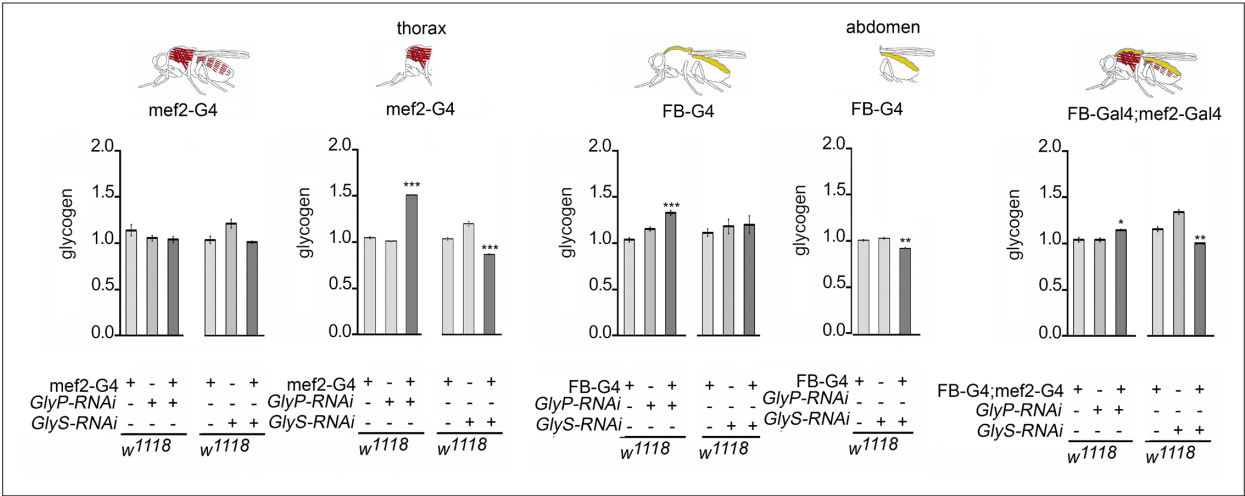

**Figure 5—figure supplement 1.** Glycogen level in adult flies with reduced GlyP and GlyS. The relative glycogen content in flies with altered GlyP and GlyS in muscles, fat bodies, or both. The expression of *GlyP-RNAi* and *GlyS-RNAi* under the control of *mef2-Gal4* did not significantly change the relative glycogen level in whole animals, but in the thorax. The expression of *GlyP-RNAi* under the control of *FB-Gal4* increased significantly glycogen levels in whole animals, and the expression of *GlyS-RNAi* decreased glycogen in the abdomen. When both drivers are combined, the expression of *GlyP-RNAi* increases glycogen in whole animals and the expression of *GlyS-RNAi* decreases the glycogen levels. Glycogen was measured in three groups of five male flies and normalized to the protein levels and to the glycogen levels of flies of the Gal4 driver. ANOVA with post hoc Tukey's Honest Significant Difference (HSD) was used to determine the differences between three groups. \*p<0.05; \*\*p<0.01, \*\*\*p<0.001.



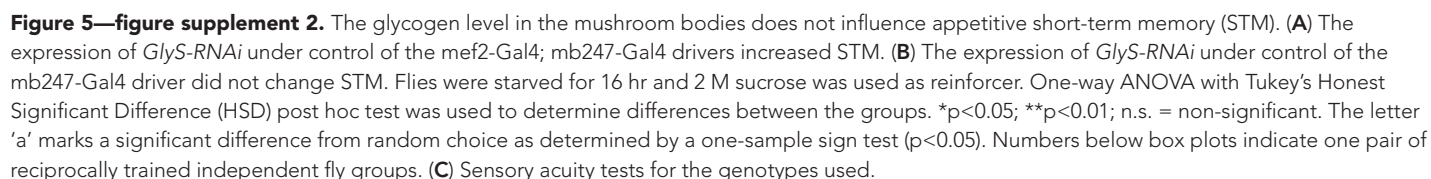



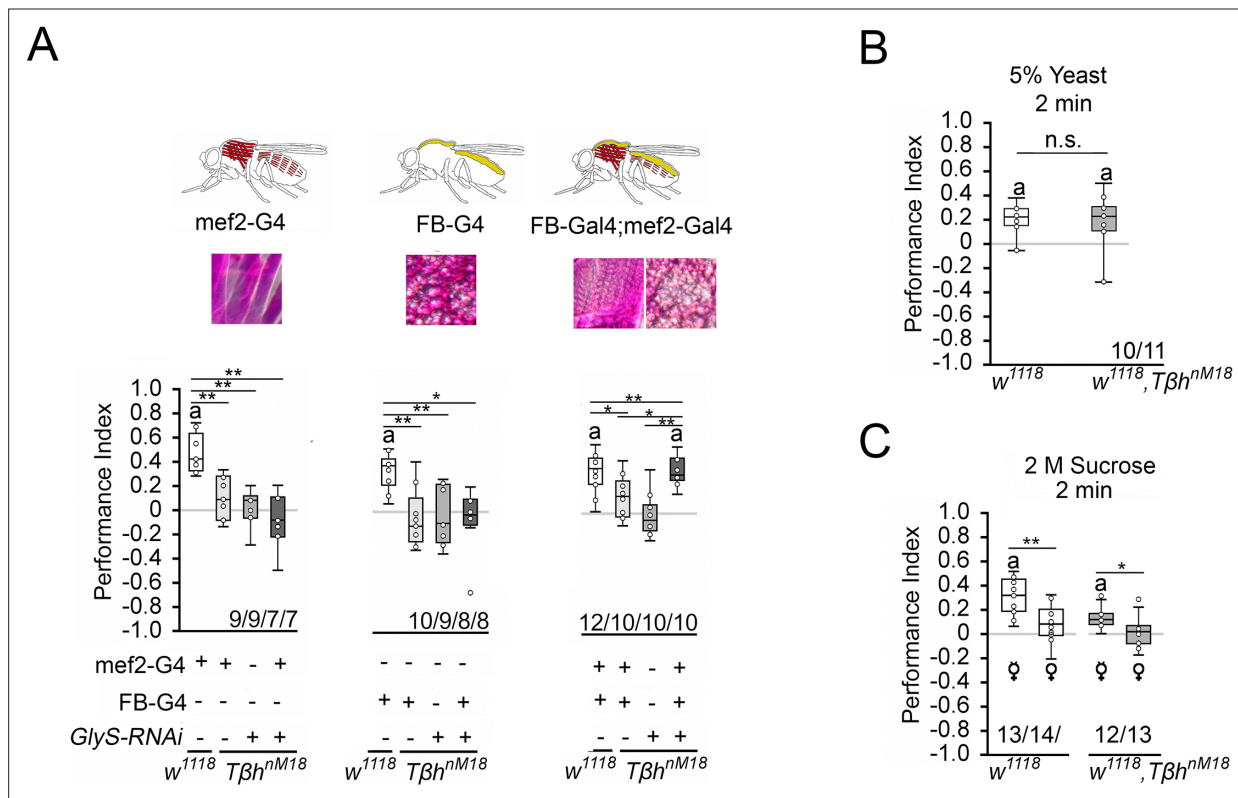

**Figure 6.** Reducing glycogen in  $T\beta h^{nm18}$  improves appetitive short-term memory (STM). **(A)** Decreasing glycogen concentration using UAS-GlyS<sup>RNAi</sup> in the muscles or fat bodies in  $T\beta h^{nm18}$  mutants did not improve STM, but decreasing glycogen in both tissues improved STM to control levels. Flies were starved for 16 hr and 2 M sucrose was used as reinforcer. **(B)** 16 hr-starved  $w^{1118}$  and  $T\beta h^{nm18}$  flies formed similar levels of appetitive STM when 5% yeast was used as a reinforcer. **(C)** 16 hr-starved virgin females of  $w^{1118}$  and  $T\beta h^{nm18}$  displayed STM, whereas mated females of both genotypes did not. Differences from random choice were determined using a one-sample sign test and marked with the letter 'a' ( $p < 0.05$ ). Differences between two groups were determined using Student's *t*-tests, and differences among four groups were determined with one-way ANOVA with Tukey's Honest Significant Difference (HSD) post hoc test. \* $p < 0.05$ ; \*\* $p < 0.01$ . Numbers below box plots indicate one pair of reciprocally trained independent fly groups.

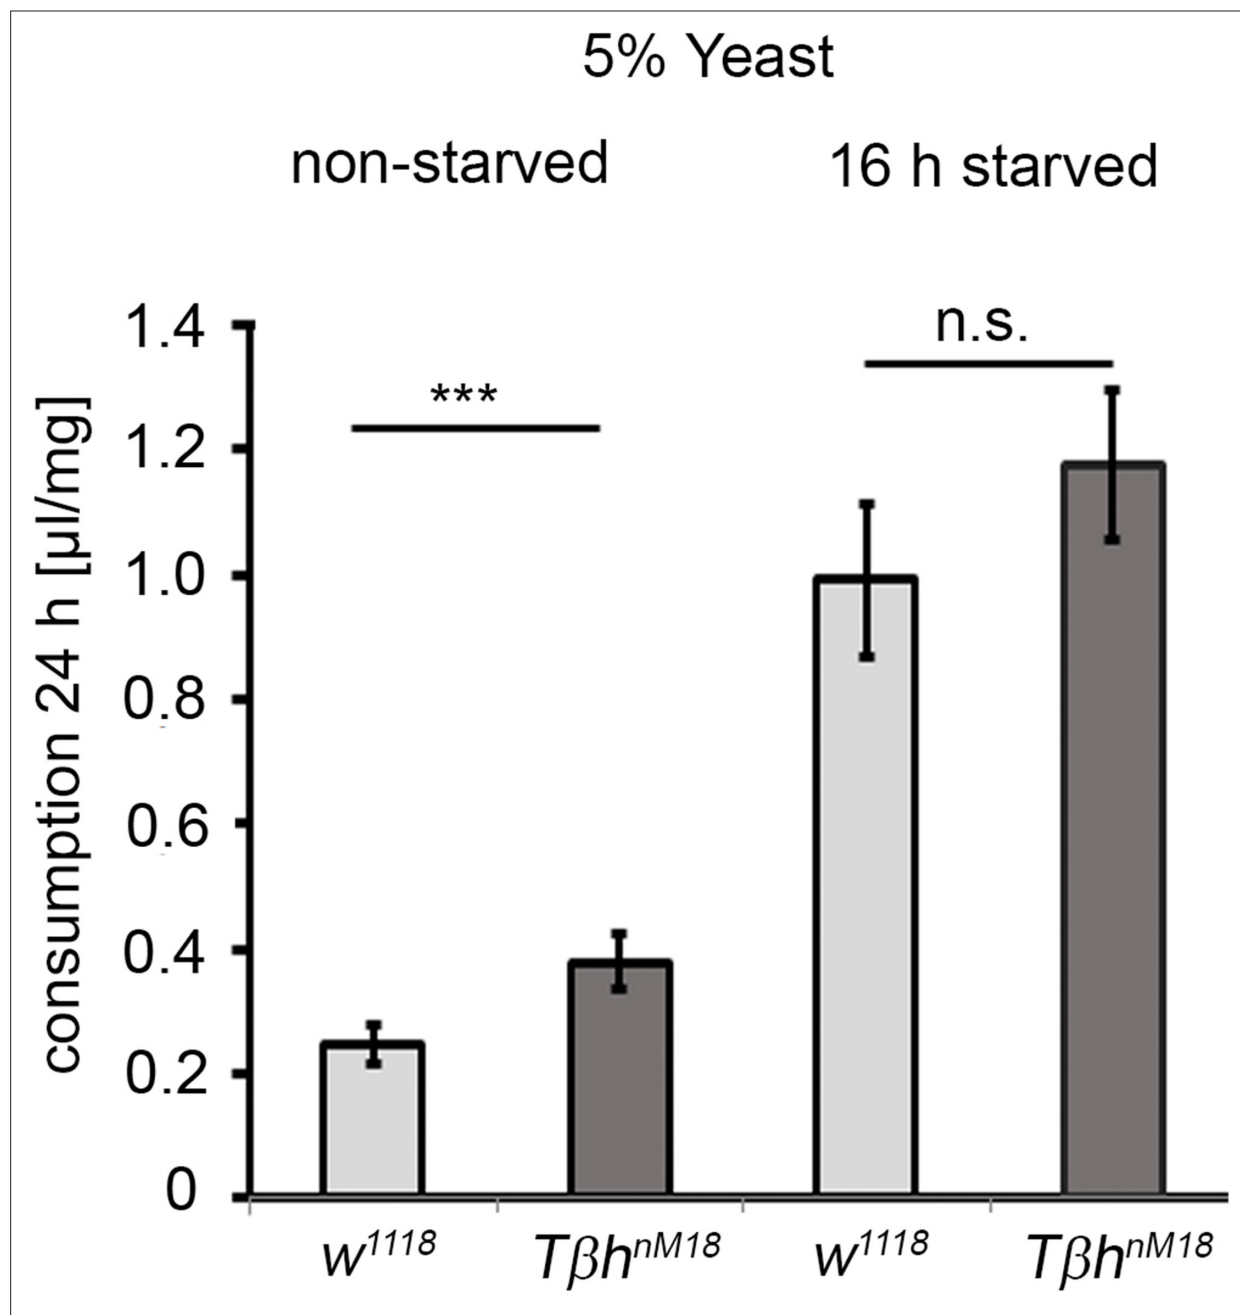

**Figure 6—figure supplement 1.** Starvation influences yeast consumption of  $T\beta h^{nm18}$  flies. Non-starved  $T\beta h^{nm18}$  male flies consumed significantly more yeast within 24 hr. Starved  $T\beta h^{nm18}$  mutants consumed similar amounts of yeast. N = 26 groups of eight flies. To determine differences between both groups, Student's t-test was used. \*\*\* $p < 0.001$ ; n.s. = non-significant difference.

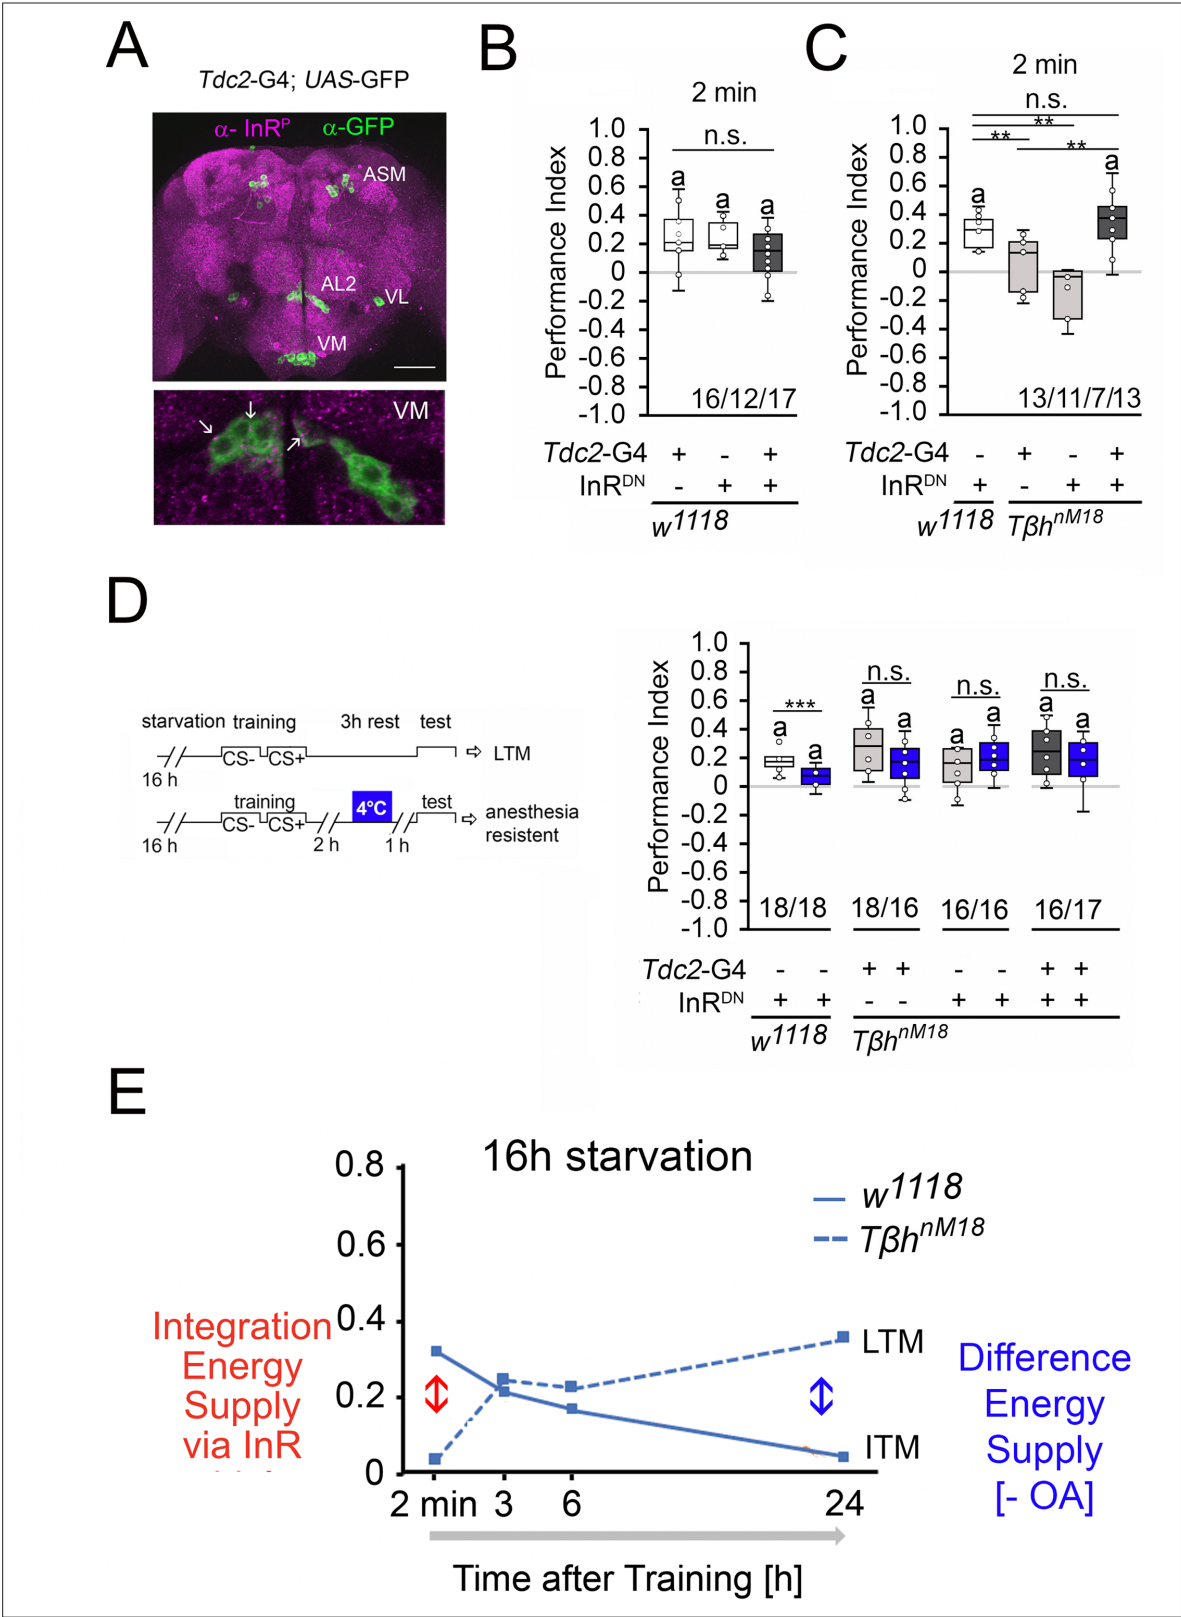

**Figure 7.** Insulin signaling in reward neurons regulates short-term memory (STM). **(A)** The activated form of the InR is expressed in punctuate manner throughout the brain (in magenta) and is also detected in octopaminergic reward neurons visualized by using the UAS-mCD8::GFP transgene under the control of the *Tdc2-Gal4* driver (in green). **(B)** Blocking InR signaling in *Tdc2-Gal4*-targeted octopaminergic neurons does not change appetitive STM in 16 hr-starved flies using 2 M as reinforcer. **(C)** Blocking InR signaling in *Tdc2-Gal4*-targeted octopaminergic neurons in *Tβh<sup>nM18</sup>* mutants restored

Figure 7 continued on next page

## Figure 7 continued

STM to control levels. **(D)** A cold shock did not disrupt emerging memory in  $T\beta h^{nM18}$  mutants with blocked InR under the control of the Tdc2-Gal4 driver. Student's t-test was used to determine differences between two groups, and one-way ANOVA with Tukey's post hoc Honest Significant Difference (HSD) test to determine differences between three or more groups. n.s. = not significant; \* $p < 0.05$ ; \*\* $p < 0.01$ ; \*\*\* $p < 0.001$ . The letter 'a' marks a significant difference from random choice as determined by a one-sample sign test ( $p < 0.05$ ). **(E)** Model of memory regulation in  $T\beta h^{nM18}$  mutants. LTM: long-term memory ; ITM: intermediate-term memory.

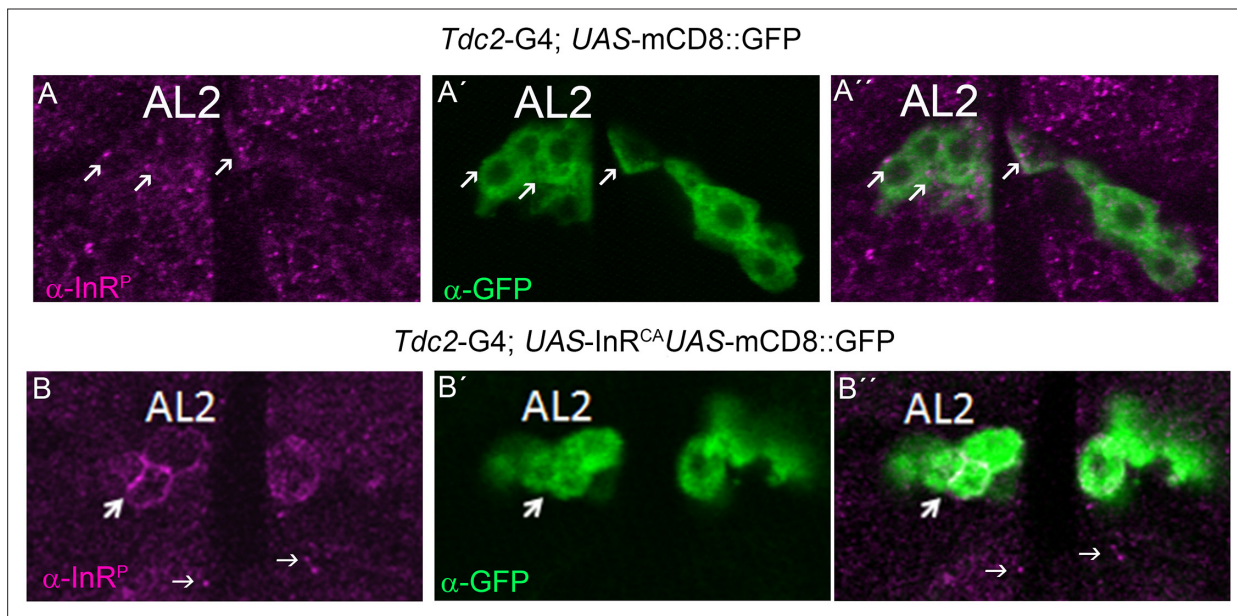

**Figure 7—figure supplement 1.** The antibody against phosphorylated InR recognizes activated InR. **(A, B)** In the antennal lobes (AL) of the male adult brain, the immunoreactivity recognized by the anti-InR<sup>P</sup> antibody is shown in magenta, and GFP expression is shown in green. The Gal4 expression of the *Tdc2*-Gal4 driver targeting octopaminergic neurons is visualized using the UAS-mCD8::GFP transgene. **(B)** The expression of the constitutively active insulin receptor results in increased immunoreactivity detected by the anti-InR<sup>P</sup> antibody.

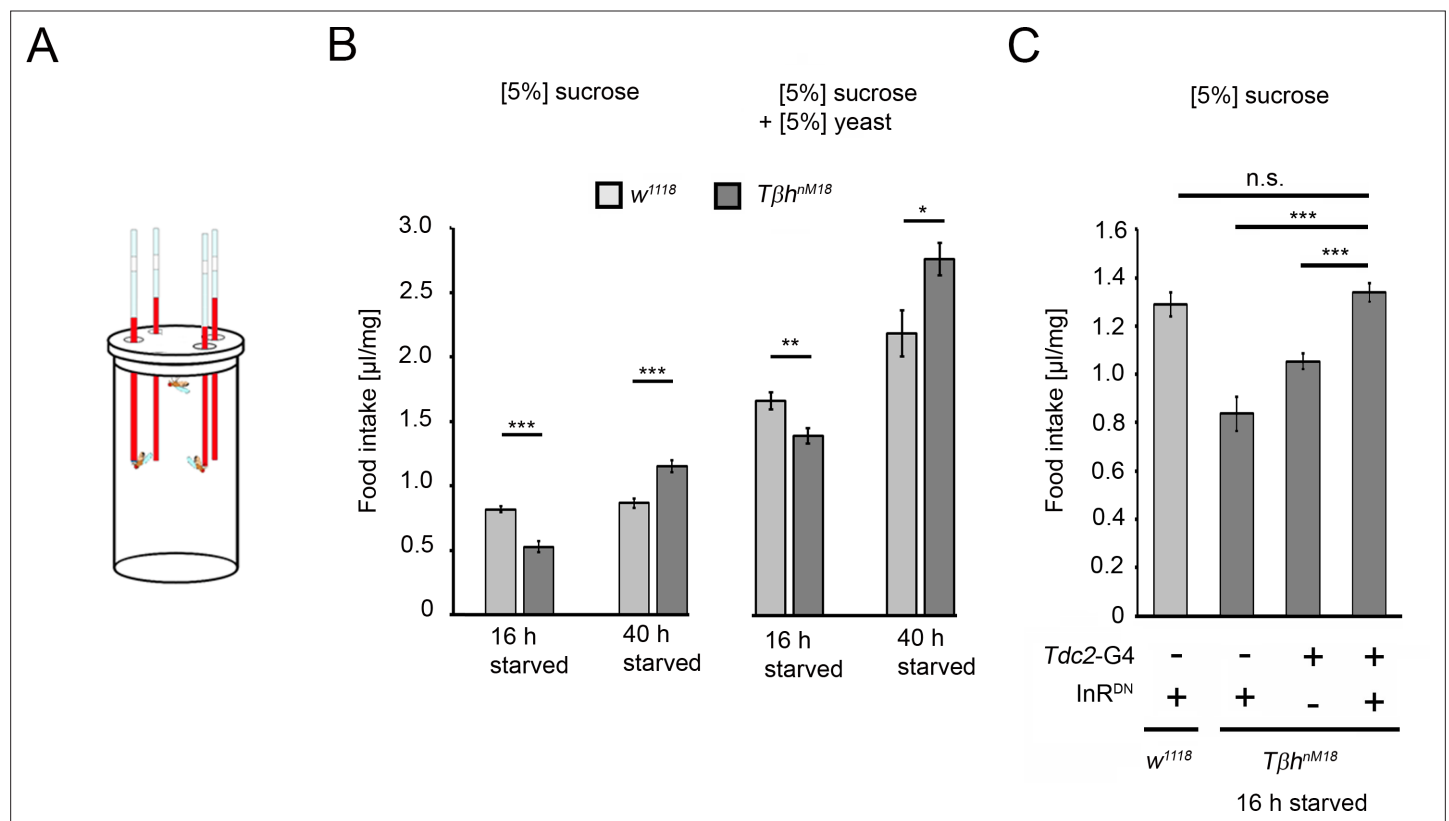

**Figure 8.** Prolonged starvation results in rebound sucrose intake in hyperglycemic  $T\beta h^{nM18}$  mutants. **(A)** Capillary feeder assay used to determine food intake. **(B)** Flies were starved 16 hr or 40 hr before 24 hr food intake was measured. After 16 hr of starvation,  $T\beta h^{nM18}$  mutants significantly consumed less 5% sucrose or 5% sucrose with 5% yeast. After 40 hr of starvation,  $T\beta h^{nM18}$  mutants significantly consumed more sucrose and sucrose with yeast.  $N = 20\text{--}26$  groups of eight flies. **(C)** Blocking  $InR$  signaling in  $Tdc2\text{-}Gal4$ -targeted octopaminergic neurons in  $T\beta h^{nM18}$  mutants significantly increased 5% sucrose consumption.  $N = 20\text{--}28$  groups of eight flies. To determine differences between two groups, Student's  $t$ -test was used, and to determine differences between three or more groups, one-way ANOVA with post hoc Tukey's Honest Significant Difference (HSD) was used. n.s. = non-significant; \* $p < 0.05$ ; \*\* $p < 0.01$ ; \*\*\* $p < 0.001$ .
